# Supplementary material for: High adherence to the ‘Wise List’ treatment recommendations in Stockholm: a 15-year retrospective review of a multifaceted approach promoting rational use of medicines
Source: PubMed Central journal article supplement — BMJ Open. 2017 May 2;7(4):e014345. doi: 10.1136/bmjopen-2016-014345 (PMC5775463; doi:10.1136/bmjopen-2016-014345), 2017-05-02
Supplement: bmjopen-2016-014345.draft_revisions.pdf [file bmjopen-2016-014345.draft_revisions.pdf]

# BMJ Open

## High adherence to the "Wise List" treatment recommendations in Stockholm: a 15-year retrospective review of a multifaceted approach promoting rational use of medicines

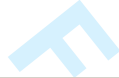

|                                 |                                                                                                                                                                                                                                                                                                                                                                                                                                                                                                                                                                                                                                                                                                                                                                                                                                                                                                                                                                                                                                                                                                                                                                                                                                                                                                                                                                                                                        |
|---------------------------------|------------------------------------------------------------------------------------------------------------------------------------------------------------------------------------------------------------------------------------------------------------------------------------------------------------------------------------------------------------------------------------------------------------------------------------------------------------------------------------------------------------------------------------------------------------------------------------------------------------------------------------------------------------------------------------------------------------------------------------------------------------------------------------------------------------------------------------------------------------------------------------------------------------------------------------------------------------------------------------------------------------------------------------------------------------------------------------------------------------------------------------------------------------------------------------------------------------------------------------------------------------------------------------------------------------------------------------------------------------------------------------------------------------------------|
| Journal:                        | <i>BMJ Open</i>                                                                                                                                                                                                                                                                                                                                                                                                                                                                                                                                                                                                                                                                                                                                                                                                                                                                                                                                                                                                                                                                                                                                                                                                                                                                                                                                                                                                        |
| Manuscript ID                   | bmjopen-2016-014345                                                                                                                                                                                                                                                                                                                                                                                                                                                                                                                                                                                                                                                                                                                                                                                                                                                                                                                                                                                                                                                                                                                                                                                                                                                                                                                                                                                                    |
| Article Type:                   | Research                                                                                                                                                                                                                                                                                                                                                                                                                                                                                                                                                                                                                                                                                                                                                                                                                                                                                                                                                                                                                                                                                                                                                                                                                                                                                                                                                                                                               |
| Date Submitted by the Author:   | 05-Oct-2016                                                                                                                                                                                                                                                                                                                                                                                                                                                                                                                                                                                                                                                                                                                                                                                                                                                                                                                                                                                                                                                                                                                                                                                                                                                                                                                                                                                                            |
| Complete List of Authors:       | Eriksen, Jaran; Karolinska Institutet, Division of Clinical Pharmacology, Department of Laboratory Medicine; Karolinska University Hospital, Clinical Pharmacology<br>Gustafsson, Lars; Division of Clinical Pharmacology, Department of Laboratory Medicine, Karolinska Institute<br>Ateva, Kristina; Stockholm Drug and Therapeutics Committee, Public Healthcare Services Committee<br>Rahmner, Pia; Medical Management Centre, Department of Learning, Informatics, Management and Economics (LIME), Karolinska Institutet<br>Håkanson.Ovesjö, Marie-Louise; Karolinska Institutet, Division of Clinical Pharmacology, Department of Laboratory Medicine; Södersjukhuset, Department of Quality and Development<br>Jirlow, Malena; Public Healthcare Services Committee<br>Juhász-Haverinen, Maria; Public Healthcare Services Committee<br>Lärfars, Gerd; Karolinska Institutet, Department of Clinical Science and Education, Internal Medicine, Södersjukhuset<br>Malmstrom, Rickard; Karolinska Institutet, Department of Medicine Solna; Karolinska University Hospital, Department of Clinical Pharmacology<br>Wettermarik, Björn; Karolinska Institutet, Division of Clinical Pharmacology, Department of Laboratory Medicines; Stockholm Drug and Therapeutics Committee<br>Andersén Karlsson, Eva; Karolinska Institutet, Department of Clinical Science and Education, Internal Medicine, Södersjukhuset |
| <b>Primary Subject Heading</b>: | Health services research                                                                                                                                                                                                                                                                                                                                                                                                                                                                                                                                                                                                                                                                                                                                                                                                                                                                                                                                                                                                                                                                                                                                                                                                                                                                                                                                                                                               |
| Secondary Subject Heading:      | Pharmacology and therapeutics, Health policy, Health economics, Evidence based practice                                                                                                                                                                                                                                                                                                                                                                                                                                                                                                                                                                                                                                                                                                                                                                                                                                                                                                                                                                                                                                                                                                                                                                                                                                                                                                                                |
| Keywords:                       | Adherence, Drug and therapeutics committee, Essential medicines, prescribing, Rational Use of Medicines, Health systems                                                                                                                                                                                                                                                                                                                                                                                                                                                                                                                                                                                                                                                                                                                                                                                                                                                                                                                                                                                                                                                                                                                                                                                                                                                                                                |
|                                 |                                                                                                                                                                                                                                                                                                                                                                                                                                                                                                                                                                                                                                                                                                                                                                                                                                                                                                                                                                                                                                                                                                                                                                                                                                                                                                                                                                                                                        |

SCHOLARONE™  
Manuscripts

1  
2  
3  
4  
5  
6  
7  
8  
9  
10  
11  
12  
13  
14  
15  
16  
17  
18  
19  
20  
21  
22  
23  
24  
25  
26  
27  
28  
29  
30  
31  
32  
33  
34  
35  
36  
37  
38  
39  
40  
41  
42  
43  
44  
45  
46  
47  
48  
49  
50  
51  
52  
53  
54  
55  
56  
57  
58  
59  
60

For peer review only

1  
2  
3 **High adherence to the "Wise List" treatment recommendations in Stockholm: a 15-year**  
4 **retrospective review of a multifaceted approach promoting rational use of medicines**  
5  
6

7 Jaran Eriksen\*, researcher and specialty registrar, Division of Clinical Pharmacology,  
8 Department of Laboratory Medicine, Karolinska Institutet and Department of Clinical  
9 Pharmacology, Karolinska University Hospital, SE-14186 Stockholm, Sweden

10 Lars L Gustafsson, professor MD, Division of Clinical Pharmacology, Department of  
11 Laboratory Medicine, Karolinska Institutet and Department of Clinical Pharmacology,  
12 Karolinska University Hospital, SE-14186 Stockholm, Sweden

13 Kristina Ateva, pharmacist, Stockholm Drug and Therapeutics Committee, Public Healthcare  
14 Services Committee, Box 17533, SE-118 91 Stockholm

15 Pia Bastholm-Rahmner, behavioural scientist, Medical Management Centre, Department of  
16 Learning, Informatics, Management and Ethics (LIME), Karolinska Institutet, SE-171 77  
17 Stockholm

18 Marie-Louise Ovesjö, consultant clinical pharmacologist, Division of Clinical Pharmacology,  
19 Department of Laboratory Medicine, Karolinska Institutet and Department of Quality and  
20 Development, Södersjukhuset, SE-118 83 Stockholm, Sweden.

21 Malena Jirlow, communication strategist, Public Healthcare Services Committee, Box 17533,  
22 SE-118 91 Stockholm

23 Maria Juhasz-Haverinen, pharmacist, Public Healthcare Services Committee, Box 17533, SE-  
24 118 91 Stockholm

25 Gerd Lärfars, associate professor, senior consultant, Department of Clinical Science and  
26 Education, Södersjukhuset, Internal Medicine, Karolinska Institutet, SE-118 83 Stockholm,  
27 Sweden

28 Rickard Malmström, associate professor, senior consultant, Department of Clinical  
29 Pharmacology, Karolinska University Hospital & Department of Medicine Solna, Karolinska  
30 Institutet, SE-17176 Stockholm, Sweden

31 Björn Wettermark, pharmacist, associate professor, Division of Clinical Pharmacology,  
32 Department of Laboratory Medicine, Karolinska Institutet at Karolinska University Hospital,  
33 Stockholm and Drug and Therapeutics Committee, SE-102 39 Stockholm

34 Eva Andersén-Karlsson, associate professor, senior consultant, Department of Clinical  
35 Science and Education, Södersjukhuset, Internal Medicine, Karolinska Institutet, SE-118 83  
36 Stockholm, Sweden

37  
38  
39  
40  
41  
42  
43  
44  
45  
46  
47  
48 On behalf of the Stockholm Drug and Therapeutics Committee: Tareq Alsaody, Peter  
49 Aspelin, Peter Bárány, Harry Beitner, Johan Bratt, Torkel B Brismar, Marja-Liisa Dahl,  
50 Ulrika Dahnell, Paulina Dalemo, Christine Fransson, Stina Fransson Sellgren, Jan  
51 Hasselström, Roger Henriksson, Rose Marie Hallin, Paul Hjemdahl, Margareta Holmström,  
52 Charlotte Höybye, Thomas Kahan, Inga Klarin, Angelica Lindén Hirschberg, Synnöve  
53 Lindemalm, Mikael Lördal, Mussie Msghina, Ricard Nergårdh, Christer Norman, Åke  
54 Örtqvist, Peter Persson, Magnus Røjvall, Michael Runold, Carl-Olav Stiller, Marie Almvik  
55 (Sundström), Leif Tallstedt, Inga Tjäder, Mia von Euler, Rumiana Zlatewa.  
56  
57  
58  
59  
60

1  
2  
3  
4  
5  
6  
7  
8  
9  
10  
11  
12  
13  
14  
15  
16  
17  
18  
19  
20  
21  
22  
23  
24  
25  
26  
27  
28  
29  
30  
31  
32  
33  
34  
35  
36  
37  
38  
39  
40  
41  
42  
43  
44  
45  
46  
47  
48  
49  
50  
51  
52  
53  
54  
55  
56  
57  
58  
59  
60

\*Corresponding author: Jaran Eriksen, Division of Clinical Pharmacology, Department of Laboratory Medicine, Karolinska Institutet at Karolinska University Hospital, SE-141 86 Stockholm, Sweden. E-mail: [jaran.eriksen@ki.se](mailto:jaran.eriksen@ki.se)

**Key words:**

Adherence, drug and therapeutics committee. essential medicines, prescribing, guidelines, health systems, rational use of medicines

For peer review only

## Abstract

**Objectives:** To present the “Wise List” (a formulary of essential medicines for primary and specialised care in Stockholm Healthcare Region) and assess adherence to the recommendations over a 15-year period.

**Design:** Retrospective analysis of all prescription data in the Stockholm Healthcare Region between 2000 and 2015 in relation to the Wise List recommendations in the same time period.

**Setting:** All outpatient care in the Stockholm Healthcare Region.

**Participants:** All prescribers in the Stockholm Healthcare Region

**Main outcome measures:** The number of substances included in the Wise List, the adherence to recommendations by Anatomic Therapeutic Chemical (ATC) 1<sup>st</sup> level using Defined Daily Doses (DDDs) adjusted to the DDD for 2015, adherence to recommendations over time measured by dispensed prescriptions yearly between 2001 and 2015.

**Results:** The number of recommended core substances was stable (175 to 212). Overall adherence to the recommendations for core medicines for all prescribers increased from 77% to 84% (2001 to 2015). The adherence to recommendations in primary care for core medicines increased from 80% to 90% (2005 to 2015) with decreasing range in practice variation (32% to 13%). Hospital prescriber adherence to core medicine recommendations was stable but increased for the combination core and complementary medicines from 77% to 88% (2007 to 2015). Adherence varied between the four therapeutic areas studied.

**Conclusions:** High and increasing adherence to the Wise List recommendations was seen for all prescriber categories. The transparent process for developing recommendations involving key opinion leaders and prescribers using strict criteria for handling potential conflicts of interests, feedback to prescribers, continuous medical education and financial incentives are possible contributing factors. High quality evidence based recommendations to prescribers, such as the Wise List, disseminated through a multifaceted approach, will become increasingly important and should be developed further to include recommendations and introduction protocols for new expensive medicines.

**Strengths of the study:**

- The study data covers all prescriptions for the Stockholm Healthcare Region (population 2.2 million)
- The study includes all care providers in the Stockholm Healthcare Region

**Limitations of the study:**

- The study does not include a control group
- A causal relationship between the guidelines and the seemingly high adherence cannot be determined

For peer review only

## Background

Inappropriate use of medicines increases the risk of therapeutic failure, adverse events, antimicrobial resistance, and is a waste of resources.<sup>1-6</sup> This recognition was a driving force behind the establishment of Drug and Therapeutics Committees (DTC)<sup>7-9</sup> and the Essential Medicines concept<sup>10</sup> introduced by the World Health Organization (WHO) in the 1970s. DTCs select medicines based on scientific evidence and influence physician prescribing to achieve rational use of medicines (RUM).<sup>8 10 11</sup> As part of their strategies, DTCs develop treatment guidelines and formularies but changing behaviour takes time and adherence to recommendations varies among prescribers and is surprisingly poor in most cases.<sup>12 13</sup> Consequently, new models need to be developed and evaluated to provide trust and adherence to recommendations of essential medicines throughout the healthcare system.

In 1996 a new Swedish law stipulated that each healthcare region should have at least one DTC to issue guidelines/recommendations and promote RUM.<sup>8</sup> This law has been essential as a platform and base for gaining trust in and assuring resources for DTCs in Stockholm. Six years after introduction of the law medicines budgets were devolved from the national to the regional level.<sup>14</sup> These changes prompted new ways to communicate independent prescribing recommendations such as the “Wise List” concept of essential medicines for common diseases introduced in Stockholm (Box 1).<sup>15</sup> The concept was designed based on the understanding that prescribing recommendations should be issued in one version for the whole region irrespective of whether patients were treated in primary or in specialised care in public or private facilities. Furthermore, a key consideration was that the recommendations have to be based on evidence and should be issued jointly by respected experts and clinicians with an aim to enhance quality of care.<sup>8 11 15-18</sup> The Wise List concept was developed knowing that multifaceted contextualized methods are needed to implement recommendations. Such strategies may include professional ownership, continuous medical education, active dissemination, “point-of-care” access to independent information about medicines as well as feedback of prescribing patterns to physicians using modern Information Communication Technology (ICT).<sup>17 19</sup> These concepts were all applied in what was introduced as the “Stockholm Model for Wise Use of Medicines” (Box 2). The Stockholm Healthcare Region had five local DTCs with their own formularies from 1980s to 1999, but a joint formulary for the entire Stockholm Healthcare Region was first issued by the regional coordinating DTC in 2000.<sup>15</sup> The Wise List concept has since then continuously improved to reach a mature design and work process.<sup>15</sup> In 2008 a minor financial incentive was introduced for primary health care centres (PHCs) achieving high adherence. Since its launch the Wise List concept has been further refined to address the increasing challenge to manage the introduction of new expensive medicines as well as to reduce the negative environmental impact of medicines.

Due to increasing costs for developing medicines, generic competition and the strained global healthcare budgets, pharmaceutical companies have changed their focus from blockbuster medicines to niched orphan drugs that have a potential to generate more revenue.<sup>20</sup> At the same time, there is growing evidence that the pharmaceutical industry influences prescriber practices,<sup>21 22</sup> but healthcare funders and medical professionals are increasingly implementing

measures to minimise negative consequences of this.<sup>23</sup> In the context of the changing medicines market the need for independent, evidence-based information for prescribers becomes increasingly important. To our knowledge there have been no scientific evaluations of health system wide interventions aiming to tackle this challenge. It is therefore important to evaluate the effects of such work done to further refine strategies for optimising use of medicines. The objective of this paper is to describe the content of the “Wise List” since its launch and to assess prescribers’ adherence to the recommendations over a 15-year period.

**Box 1: The Wise List concept ([www.janusinfo.se/In-English/The-Wise-List-2015-in-English/](http://www.janusinfo.se/In-English/The-Wise-List-2015-in-English/))<sup>24</sup>**

- The Wise List (“Kloka Listan” in Swedish) was developed for the whole Stockholm Healthcare Region in 2000 (the name “Wise List” was launched in 2001)
- Includes around 200 recommended core medicines for the treatment of common diseases in primary and hospital care
- Includes 100 complementary medicines for common diseases in specialised care (since 2007)
- Covers 24 therapeutic areas
- Is a pocket-sized booklet and also available in a web-version
- Trusted medical colleagues and pharmacotherapeutic experts together with clinical pharmacologists, pharmacists and nurses agree on recommendations based on review of scientific evidence using clear transparent criteria, including cost-effectiveness evaluation
- Includes non-pharmacological advice for several therapeutic areas. For some therapeutic areas there are step-wise recommendations linked to disease severity and concomitant diseases
- This joint effort across disciplines and institutions including a policy for conflict of interest with annually renewed declarations has been a prerequisite in achieving trust in and adherence to recommendations
- The Wise List also includes around 10 “Wise piece of advice” (short, focussed messages) selected yearly to improve certain pharmacotherapeutic practices for which there are potential for improvement in quality of medicine use, e.g. “*Do not treat uncomplicated acute bronchitis with antibiotics*”
- The Wise List is communicated through a comprehensive communication, branding and marketing strategy with experts in a key role and integrated with a program for continuous medical education<sup>15 18</sup> (Box 2)

**Definitions used in this paper**

*Core medicines* = Essential medicines for common illnesses, recommended both for primary and specialised care.

*Complementary medicines* = Additional essential medicines to be recommended primarily for specialised care.

These definitions are based on the WHO model list of essential medicines.<sup>25</sup>



**Box 2: The Stockholm model for wise use of medicines**

The core part of the model is The Wise List (central part of figure). The outer circle represents the Key Strategies and the Organisational Unit, which are a pre-requisite for the collaborative work for a wise use of medicines. Since 1996 a new Swedish law stipulated that each healthcare region should have at least one Drug and Therapeutics Committee (DTC). This has provided mandate and organisational stability to issued recommendations by DTCs.<sup>8</sup> The jigsaw puzzle shows key elements necessary for producing the Wise List and implementing its guidelines in medical practice in the Stockholm Healthcare region.

**Material and methods*****Study area***

This study was conducted in Stockholm Healthcare Region with approximately 2.2 million inhabitants served by more than 200 PHCs, seven emergency hospitals as well as geriatric clinics, psychiatric services, private specialists, nursing homes and other healthcare providers (e.g. occupational health, school health, rehabilitation). Swedish healthcare is financed through public taxation with limited patient co-payment for prescribed medicines and health care visits.<sup>26</sup>

***Data sources***

The number of different substances recommended as core or complementary medicines was collected from a database of the contents of the “Wise List” from 2000 to 2015. Data are presented by therapeutic area ATC 1st level and year.<sup>27</sup> The year 2000 was chosen as the initial year of observation as the first joint list of recommendations for the whole region was launched that year.

We also compiled all “Wise pieces of advice” (short messages aimed at improving pharmacotherapy (Box 1)), from each edition of the “Wise List”.

Data on dispensed prescriptions were collected from the Swedish Prescribed Drug Register. In addition to the prescriptions, the register contains patient demographic data as well as information about the unit where the prescription was issued.<sup>28</sup>

***Data analysis******Number of substances and the Wise pieces of advice***

The number of substances included in the Wise List each year was calculated and presented according to their classification as core or complementary medicines.

The Wise pieces of advice were grouped within four areas, i.e.: (i) choice of medicine – i.e.

1  
2  
3 preferred choice of substance within a group of medicines used for a specific disease, (ii)  
4 overtreatment – i.e. avoid using medicines unnecessarily, (iii) under treatment – i.e. reminders  
5 to test for and treat conditions that are under diagnosed and/or under treated in the Stockholm  
6 region, or (iv) any other type of general advice related to RUM.  
7  
8

### 9 Adherence to recommendations

10 Data were analysed by ATC using Defined Daily Doses (DDD) adjusted to correspond to the  
11 DDD for the year 2015.<sup>27 29</sup> The year 2002 was chosen as baseline since a national regulation  
12 for mandatory generic substitution resulting in substantial price reductions for generics was  
13 introduced in October that year, thus changing the pharmaceutical market substantially.<sup>14 30</sup>  
14 Separate analyses on the overall adherence were also made for each individual PHC in 2005,  
15 2010 and 2015 to assess to what extent variation between practices had changed over time.  
16  
17  
18

19 Data on prescriptions were analysed with respect to the overall adherence to the Wise List  
20 recommendations – both for all caregivers together and by category of caregiver. Caregiver  
21 categories were primary care, outpatient hospital care and others. The latter included  
22 psychiatry, geriatrics, rehabilitation, school health, occupational health and private  
23 practitioners of various specialities. Data on category of caregiver was available from 2003.  
24  
25

### 26 Change over time in adherence to recommendations

27 Adherence to recommendations was measured based on all dispensed prescriptions in  
28 Stockholm Healthcare Region each year between 2002 (when prescriber work place ID was  
29 added to the Swedish Prescribed Drug Register) and 2015. We also studied adherence to the  
30 guidelines in four different pharmacotherapeutic areas: (1) proton pump inhibitors (PPIs), (2)  
31 COX-inhibitors, (3) statins and (4) selective serotonin receptor uptake inhibitors (SSRI) or  
32 serotonin-noradrenaline reuptake inhibitors (SNRI). These medicines were selected as there  
33 were specific “Wise pieces of advice” relating to these groups of medicines during the study  
34 period. The Wise pieces of advice concerning these pharmacotherapeutic areas were  
35 warranted either because of safety concerns or because there was a need to counteract  
36 commercial pressure on physicians to prescribe new, less cost-effective treatments.<sup>31 32</sup>  
37  
38  
39  
40  
41  
42

### 43 **Statistical analyses**

44 Descriptive statistics were used including numbers and proportions expressed in percentages  
45 for different groups. The adherence to the Wise List was measured using the Drug Utilization  
46 90% (DU 90%) method.<sup>33</sup> This method is recommended by the WHO for drug utilization  
47 studies and defines the number of different substances (ATC 5th level) constituting 90% of  
48 the volume expressed in DDDs and the adherence to recommendations within this segment.<sup>33</sup>  
49 This method is routinely used in the Stockholm region to monitor the adherence to the Wise  
50 List recommendations as well as to provide feedback to prescribers forming the basis for local  
51 quality assessment and continuous medical education.<sup>19 34</sup>  
52  
53  
54

55 Variation between practices was calculated using the extremal quotient (ratio of maximum to  
56 minimum value).  
57  
58  
59  
60

1  
2  
3  
4 All data were analysed using the statistical package SAS version 9.4 (SAS Institute, Cary,  
5 NC) and Microsoft Excel 2010.  
6  
7

### 8 **Ethical considerations**

9 This work was based on routinely available aggregate prescribing information from databases  
10 used for monitoring healthcare with no possibility to identify individual patients or  
11 prescribers. The analyses were part of ongoing quality improvement work at Stockholm  
12 Healthcare Region. All data analyses complied with Swedish Personal Data Act and no  
13 application for approval by the Regional Institutional Review Board was therefore needed.  
14  
15  
16

### 17 **Results**

#### 18 *Number of substances included as recommendations in the Wise List over time*

19 The number of recommended core medicines in the Wise List was relatively stable over the  
20 years, fluctuating between 175 and 212 substances. Complementary medicines were included  
21 in the Wise List from 2007 and have remained at around 100 substances since then (fig. 1).  
22  
23  
24

#### 25 *Categories of Wise pieces of advice*

26 The concept of Wise pieces of advice was introduced in 2003. There have been around 10  
27 individual pieces of advice every year, comprising in total 55 unique messages. Some advice  
28 were only included in the list for one year, whereas 20 of the advice have been included for 3  
29 years or more. Most advice (n=19) addressed choice of medicine within a class, the remaining  
30 concerned general advice (n=14), over treatment (n=12) or under treatment (n=10). The  
31 pharmacotherapeutic areas with the highest number of Wise pieces of advice were  
32 cardiovascular diseases (n=9), infectious diseases (n=8), general/geriatric (n=7), psychiatry  
33 and pain treatment (both n=7). Examples of advice are listed in table 1.  
34  
35  
36  
37

#### 38 *Overall adherence to the Wise List*

39 The overall adherence to the Wise List recommendations for core medicines for all  
40 prescribers (primary and specialised care) in the region increased steadily from 77% in 2001  
41 to 84% in 2015. The adherence rates differed between prescriber categories, but increased for  
42 all of them.  
43  
44  
45

46 The adherence to recommendations in primary care for core medicines increased from 80% in  
47 2005 to 90% in 2015 (fig 2) and showed a decreasing range in variation between practices  
48 over time from 32% (57% to 89%) in 2005, 26% (69% to 95%) in 2010 to 13% (84% to 97%)  
49 in 2015. The extremal quotient showed a significant reduction from 1.6 in 2005, 1.4 in 2010  
50 to 1.3 in 2015.  
51  
52

53 For prescribers at hospitals the adherence to core medicine recommendations was stable from  
54 2003 to 2015 (71% to 73%) but increased for the combination core plus complementary  
55 medicines between 2007 and 2015 from 77% to 88%. For all other prescriber categories the  
56  
57  
58  
59  
60

1  
2  
3 adherence increased over the time periods both for core (65% to 72%) and for the  
4 combination core plus complementary medicines (71% to 83%) (fig 2).  
5  
6

#### 7 *Adherence to specific pharmacotherapeutic areas in the Wise List*

8 Statins: Wise pieces of advice for statins have been included in the Wise List most years since  
9 its launch. The recommendation has been both to increase the use of statins in high-risk  
10 patients, as well as to choose simvastatin. Simvastatin had good documentation and low price  
11 due to patent expiry already in 2003 and was, before patent expiry of atorvastatin, considered  
12 more cost-effective than the other statins.<sup>35</sup> The volumes of statins increased throughout the  
13 period and simvastatin was the dominating substance. Prescribing of other statins remained at  
14 a low level but when the patent for atorvastatin expired and less expensive generics became  
15 available, the Wise List included this substance among the recommended ones (from 2013),  
16 which is also reflected in higher volumes of atorvastatin prescriptions dispensed (fig 3).  
17  
18  
19

20 PPIs: There have been several Wise pieces of advice related to the use of PPIs in the Wise  
21 List over the study period. These have aimed to decrease unnecessary use of PPIs, as well as  
22 recommending omeprazole (and pantoprazole and lansoprazole in 2002-2003) instead of other  
23 less cost-effective PPIs. Despite this, volumes of PPIs more than doubled between 2002 and  
24 2015 to the equivalent of 4.5% of the population constantly treated with PPIs with the vast  
25 majority of prescriptions for omeprazole (fig 4).  
26  
27  
28

29 SSRI/SNRI: Due to strong marketing pressure from the industry to prescribe the S-  
30 enantiomer of citalopram (escitalopram),<sup>36</sup> a Wise piece of advice was introduced in 2011  
31 recommending the prescriber to use either citalopram or sertraline for patients in need of  
32 pharmacological treatment of depression. Citalopram and sertraline dominated the treatment  
33 throughout the period, but prescriptions for all other antidepressants have also increased (fig  
34 5).  
35  
36  
37

38 COX-inhibitors: In 2012 the Wise List changed its recommendation from diclofenac to  
39 naproxen based on accumulated evidence indicating an increased risk for cardiovascular  
40 events in patients using diclofenac.<sup>37</sup> A rapid change in prescribing patterns was observed  
41 with a marked decrease in diclofenac prescribing with a corresponding increase for naproxen  
42 (figure 6).  
43  
44  
45

#### 46 **Discussion**

47  
48 This study demonstrates high adherence to the Wise List recommendations in the Stockholm  
49 Healthcare Region. The overall adherence rate increased steadily over time, but with  
50 variations between therapeutic areas. Additionally the number of recommended core  
51 substances has been kept stable (around 200 substances) for the 15 years since the  
52 introduction of the Wise List despite the number of substances with market authorisation in  
53 Sweden increasing from 1235 to 1554 in the same time period. A limited number of  
54 recommendations is critical to make it feasible for prescribers to choose the best therapies for  
55  
56  
57  
58  
59  
60

1  
2  
3 their patients, keeping knowledge up to date among prescribers about the clinical  
4 pharmacology and pharmacotherapeutic characteristics of each recommended medicine.<sup>8 9 15</sup>  
5  
6

7 High adherence to the Wise List recommendations was seen across all therapeutic areas both  
8 in primary and hospital care. There could be several reasons for this. We consider that the  
9 transparent development process of recommendations involving key opinion leaders and  
10 prescribers within different therapeutic areas and strict criteria for handling potential conflicts  
11 of interests are essential for the high success rates to recommendations.<sup>15 38</sup> Financial  
12 incentives were introduced in Stockholm healthcare region in 2008<sup>14</sup> and have also been  
13 shown to contribute to the high adherence.<sup>34</sup> Originally, these incentives were introduced in  
14 primary care where PHCs received a small bonus linked to their adherence to the Wise List if  
15 the adherence was more than 80% and if they reflected on their prescribing patterns in a  
16 “quality report”.<sup>34</sup> Since 2008 core Wise List medicines (about 200) are free of charge for all  
17 hospitals whereas they have to fund 50% of the cost of all other prescribed medicines.  
18 Previously the healthcare region covered all costs for prescriptions across hospitals and  
19 healthcare institutions centrally. Sound and trusted evidence based guidelines in combination  
20 with a communication strategy consisting of a branding and marketing strategy for both  
21 prescribers and the public, integrated with a program for continuous medical education, are  
22 major factors for successful adherence to DTC recommendations. Multifaceted interventions,  
23 academic detailing and reminders have all been found to be effective.<sup>16 39 40</sup> In Stockholm the  
24 communication strategy, including an active continuous medical education programme is an  
25 ongoing, continuously evolving important part of the Wise List strategy.<sup>18</sup> Prescriber  
26 ownership of the strategy has strengthened the Wise List work in developing and adopting  
27 state-of-the-art recommendations.<sup>11-13 15 16</sup>  
28  
29  
30  
31  
32  
33  
34

35 Our findings from the specific therapeutic areas demonstrate that the prescribers switched  
36 substances within a therapeutic area and reduced under treatment in accordance with the Wise  
37 List and Wise pieces of advice. However, the list has not been successful in reducing  
38 overtreatment. The failure in reducing PPI use is in concordance with other European  
39 countries where prescribing of PPI has also increased several-fold.<sup>31</sup> In contrast, there was a  
40 marked switch in COX-inhibitor prescriptions from diclofenac to naproxen after a change of  
41 recommendations in the 2012 Wise List edition. An important explanation for the difference  
42 in adherence between these therapeutic areas may be the fact that using omeprazole has no  
43 clear medical disadvantage. The reason for switching from diclofenac to naproxen was  
44 accumulated evidence showing increased risk of cardiovascular disease with diclofenac,<sup>37</sup>  
45 which was clearly accepted by clinicians. Another factor that might have contributed is the  
46 difference in pressure from the pharmaceutical industry. Similar to the findings for COX-  
47 inhibitors the prescribers followed the recommendations for statins and SSRI/SNRI to a high  
48 degree and the prescribing of non-recommended escitalopram was low despite high marketing  
49 pressure similar to that of esomeprazole.<sup>36</sup> The adherence to the recommendation to use  
50 simvastatin instead of atorvastatin or rosuvastatin resulted in substantial economical savings  
51 for the Stockholm Health Care Region in contrast to other countries where rosuvastatin was  
52 the most prescribed statin.<sup>41</sup> To illustrate this, if just 10% of the simvastatin DDD had been  
53 replaced by rosuvastatin in 2008 this would have increased costs by 14.4 million SEK (1 SEK  
54  
55  
56  
57  
58  
59  
60



1  
2  
3 ~ 0.1 € in 2008). This is similar to a Canadian study of publically funded outpatient  
4 medicines where implementing harmonised prescribing recommendations could save  
5 pharmaceutical cost.<sup>42</sup> Regional differences in medicine costs within the Medicare system in  
6 the US have been shown to depend on the medicines selected for the formulary.<sup>43</sup>  
7  
8

9 Although we can relate prescribing data to the content of the Wise List and the Wise pieces of  
10 advice, without a control group we cannot know whether the seemingly high adherence is in  
11 fact due to a causal relationship between these factors. However, a major strength of the study  
12 is that we have data for a whole region, including all prescriptions from all care providers.  
13  
14

15 New niche medicines, soaring medicine costs and limited budgets pose new challenges to  
16 health care systems globally. Furthermore, the large number of new expensive biological  
17 medicines in pipeline has highlighted the importance of priority setting and development of  
18 methods to monitor the adherence to the recommendations,<sup>44</sup> and high quality evidence based  
19 recommendations to prescribers, such as the Wise List, become increasingly important. In our  
20 view, it is of critical importance that trusted recommendations and introduction protocols are  
21 developed for the use of new expensive medicines. A DTC/Wise List with focus on and with  
22 recommendations for specialised healthcare is necessary to ensure cost-effective and  
23 egalitarian use of medicines in the future. New multifaceted methods for safe and successful  
24 evidence-based introduction of medicines must be developed. This will be a major challenge  
25 for the future but could build on components in the Wise List concept that has led to high  
26 adherence to recommendations sustained for 15 years.  
27  
28  
29  
30  
31  
32

### 33 **Acknowledgments**

34 The authors would like to thank Stockholm Healthcare Region for providing time for experts  
35 to evaluate the data making completion of this study possible.  
36  
37  
38  
39

### 40 **Competing Interest Statement**

41 All authors have completed the ICMJE uniform disclosure form at  
42 [http://www.icmje.org/coi\\_disclosure.pdf](http://www.icmje.org/coi_disclosure.pdf) and declare: no support from any organisation for  
43 the submitted work and no financial relationships with any organisations that might have an  
44 interest in the submitted work in the previous three years. Jaran Eriksen is member of an  
45 expert panel of the Stockholm DTC since 2013. Kristina Ateva, Pia Bastholm-Rahmner,  
46 Maria Juhasz-Haverinen, Malena Jirlow, Marie-Louise Ovesjö, Björn Wettermark are  
47 employed by Stockholm Healthcare Region that finances the Drug and Therapeutics  
48 Committee (DTC) issuing the “Wise List” in Stockholm. Eva Andersén-Karlsson served as  
49 chair-woman of Stockholm DTC 2010-2016, Lars L Gustafsson as chairman 2000-2009 and  
50 Gerd Lärfars is chair woman since 2016 and Rickard Malmström deputy chairman since  
51 2016.  
52  
53  
54  
55

56 The co-authors and collaborators: Tareq Alsaody, Peter Aspelin, Peter Bárány, Harry Beitner,  
57 Johan Bratt, Torkel B Brismar, Marja-Liisa Dahl, Ulrika Dahnell, Paulina Dalemo, Christine  
58  
59  
60

1  
2  
3 Fransson, Stina Fransson Sellgren, Jan Hasselström, Roger Henriksson, Rose Marie Hallin,  
4 Paul Hjemdahl, Margareta Holmström, Charlotte Höybye, Thomas Kahan, Inga Klarin,  
5 Angelica Lindén Hirschberg, Synnöve Lindemalm, Mikael Lördal, Mussie Msghina, Ricard  
6 Nergårdh, Christer Norman, Åke Örtqvist, Peter Persson, Magnus Røjvall, Michael Runold,  
7 Carl-Olav Stiller, Marie Almvik (Sundström), Leif Tallstedt, Inga Tjäder, Mia von Euler,  
8 Rumiana Zlatewa are either present member of Stockholm DTC or chairing one of the 21  
9 expert panels of Stockholm DTC. None of the authors or collaborators listed here have  
10 received any salary or economic support for the research presented in this work.  
11  
12

### 13 14 15 16 **Data sharing**

17 We have used routinely available prescribing data for a selected group of therapeutic classes.  
18 More analyses can be made for these medicines as well as for other medicines prescribed in  
19 Sweden.  
20

### 21 22 **Contributorship statement**

23 JE contributed to the conception and design of the study, analysis and interpretation of the  
24 data, drafted and revised the manuscript. LLG contributed to the conception and design of the  
25 study, analysis and interpretation of the data, and revised the manuscript. KA contributed to  
26 data acquisition, analysis and interpretation, and revised the manuscript. PBR contributed to  
27 data analysis and interpretation, and revised the manuscript. BW contributed to the conception  
28 and design of the study, data acquisition, analysis and interpretation of the data, and revised  
29 the manuscript. MJ contributed to data analysis and interpretation, and revised the manuscript.  
30 MJH contributed to the data acquisition, analysis and interpretation of the data, and revised  
31 the manuscript. RM contributed to the conception and design of the study, analysis and  
32 interpretation of the data, and revised the manuscript. MLHO contributed to the conception  
33 and design of the study, analysis and interpretation of the data, and revised the manuscript.  
34 GL contributed to data analysis and interpretation, and revised the manuscript. EAK  
35 contributed to the conception and design of the study, analysis and interpretation of the data,  
36 and revised the manuscript. All authors critically revised and approved the final manuscript.  
37  
38  
39  
40  
41  
42  
43

### 44 **Funding statement**

45 This study was in part supported by grants from Karolinska Institutet, Stockholm, Sweden.  
46  
47  
48  
49

### 50 **References**

- 51  
52  
53 1. Bergman U, Wiholm BE. Drug-related problems causing admission to a medical clinic. *Eur J Clin*  
54 *Pharmacol* 1981;**20**(3):193-200.  
55 2. Davies EC, Green CF, Taylor S, et al. Adverse drug reactions in hospital in-patients: a prospective  
56 analysis of 3695 patient-episodes. *PLoS One* 2009;**4**(2):e4439.  
57  
58  
59  
60

3. Molstad S, Erntell M, Hanberger H, et al. Sustained reduction of antibiotic use and low bacterial resistance: 10-year follow-up of the Swedish Strama programme. *Lancet Infect Dis* 2008;**8**(2):125-32.
4. WHO. The rational use of drugs - report of the conference of experts Nairobi, 25-29 November 1985. <http://apps.who.int/medicinedocs/documents/s17054e/s17054epdf>. Geneva, Switzerland: World Health Organization, 1987.
5. McGinn D, Godman B, Lonsdale J, et al. Initiatives to enhance the quality and efficiency of statin and PPI prescribing in the UK: impact and implications. *Expert Rev Pharmacoecon Outcomes Res* 2010;**10**(1):73-85.
6. Norman C, Zarrinkoub R, Hasselstrom J, et al. Potential savings without compromising the quality of care. *Int J Clin Pract* 2009;**63**(9):1320-6.
7. Fijn R, Brouwers JR, Knaap RJ, et al. Drug and Therapeutics (D & T) committees in Dutch hospitals: a nation-wide survey of structure, activities, and drug selection procedures. *Br J Clin Pharmacol* 1999;**48**(2):239-46.
8. Sjöqvist F, Bergman U, Dahl M, et al. Drug and therapeutics committees: a Swedish experience. *WHO Drug Information* 2002;**16**(3).
9. Birkett D, Brosen K, Cascorbi I, et al. Clinical pharmacology in research, teaching and health care: Considerations by IUPHAR, the International Union of Basic and Clinical Pharmacology. *Basic Clin Pharmacol Toxicol* 2010;**107**(1):531-59.
10. WHO. The Selection of Essential Drugs: Report of a WHO Expert Committee. Technical Report Series no 615. Geneva, Switzerland: World Health Organization, 1977.
11. Schiff GD, Galanter WL, Duhig J, et al. A prescription for improving drug formulary decision making. *PLoS Med* 2012;**9**(5):1-7.
12. Grol R, Grimshaw J. From best evidence to best practice: effective implementation of change in patients' care. *Lancet* 2003;**362**(9391):1225-30.
13. Grol R. Successes and failures in the implementation of evidence-based guidelines for clinical practice. *Med Care* 2001;**39**(8 Suppl 2):II46-54.
14. Godman B, Wettermark B, Hoffmann M, et al. Multifaceted national and regional drug reforms and initiatives in ambulatory care in Sweden: global relevance. *Expert Rev Pharmacoecon Outcomes Res* 2009;**9**(1):65-83.
15. Gustafsson LL, Wettermark B, Godman B, et al. The 'wise list'- a comprehensive concept to select, communicate and achieve adherence to recommendations of essential drugs in ambulatory care in Stockholm. *Basic Clin Pharmacol Toxicol* 2011;**108**(4):224-33.
16. Grimshaw JM, Thomas RE, MacLennan G, et al. Effectiveness and efficiency of guideline dissemination and implementation strategies. *Health Technol Assess* 2004;**8**(6):iii-iv, 1-72.
17. Grol R, Dalhuijsen J, Thomas S, et al. Attributes of clinical guidelines that influence use of guidelines in general practice: observational study. *BMJ* 1998;**317**(7162):858-61.
18. Bjorkhem-Bergman L, Andersen-Karlsson E, Laing R, et al. Interface management of pharmacotherapy. Joint hospital and primary care drug recommendations. *Eur J Clin Pharmacol* 2013;**69** Suppl 1:73-8.
19. Wettermark B, Haglund K, Gustafsson LL, et al. A study of adherence to drug recommendations by providing feedback of outpatient prescribing patterns to hospital specialists. *Pharmacoepidemiol Drug Saf* 2005;**14**(8):579-88.
20. Kumar Kakkar A, Dahiya N. The evolving drug development landscape: from blockbusters to niche busters in the orphan drug space. *Drug Dev Res* 2014;**75**(4):231-4.
21. Yeh JS, Franklin JM, Avorn J, et al. Association of Industry Payments to Physicians With the Prescribing of Brand-name Statins in Massachusetts. *JAMA Intern Med* 2016;**176**(6):763-8.
22. Lieb K, Scheurich A. Contact between doctors and the pharmaceutical industry, their perceptions, and the effects on prescribing habits. *PLoS One* 2014;**9**(10):e110130.
23. Abbasi K, Smith R. No more free lunches. *BMJ* 2003;**326**(7400):1155-6.
24. The Stockholm Drug and Therapeutics Committee. The Wise List 2015 in English. <http://www.janusinfo.se/In-English/The-Wise-List-2015-in-English/>. Stockholm, Sweden: Stockholm Healthcare Region, 2015.



25. WHO. WHO Model List of Essential Medicines - 19th List. In: <http://www.who.int/medicines/publications/essentialmedicines/en/>, ed. Geneva, Switzerland: World Health Organization, 2015.
26. Anell A. The public-private pendulum--patient choice and equity in Sweden. *N Engl J Med* 2015;**372**(1):1-4.
27. WHO. WHO Collaborating Centre for Drug Statistics Methodology, Guidelines for ATC classification and DDD assignment, 2015. Oslo: World Health Organization, 2014.
28. Wettermark B, Hammar N, Fored CM, et al. The new Swedish Prescribed Drug Register--opportunities for pharmacoepidemiological research and experience from the first six months. *Pharmacoepidemiol Drug Saf* 2007;**16**(7):726-35.
29. Vlahovic-Palcevski V, Gantumur M, Radosevic N, et al. Coping with changes in the Defined Daily Dose in a longitudinal drug consumption database. *Pharm World Sci* 2010;**32**(2):125-9.
30. Andersson K, Bergstrom G, Petzold MG, et al. Impact of a generic substitution reform on patients' and society's expenditure for pharmaceuticals. *Health Policy* 2007;**81**(2-3):376-84.
31. Godman B, Shrank W, Andersen M, et al. Comparing policies to enhance prescribing efficiency in Europe through increasing generic utilization: changes seen and global implications. *Expert Rev Pharmacoecon Outcomes Res* 2010;**10**(6):707-22.
32. Godman B, Malmstrom RE, Diogene E, et al. Are new models needed to optimize the utilization of new medicines to sustain healthcare systems? *Expert Rev Clin Pharmacol* 2015;**8**(1):77-94.
33. Bergman U, Popa C, Tomson Y, et al. Drug utilization 90%--a simple method for assessing the quality of drug prescribing. *Eur J Clin Pharmacol* 1998;**54**(2):113-8.
34. Wettermark B, Pehrsson A, Juhasz-Haverinen M, et al. Financial incentives linked to self-assessment of prescribing patterns: a new approach for quality improvement of drug prescribing in primary care. *Qual Prim Care* 2009;**17**(3):179-89.
35. Hjemdahl P, Allhammar A, Heaton C, et al. [SBU should investigate what is an evidence-based and cost-effective use of statins]. *Lakartidningen* 2009;**106**(32-33):1992-4.
36. Gellad WF, Choi P, Mizah M, et al. Assessing the chiral switch: approval and use of single-enantiomer drugs, 2001 to 2011. *Am J Manag Care* 2014;**20**(3):e90-7.
37. Fosbol EL, Folke F, Jacobsen S, et al. Cause-specific cardiovascular risk associated with nonsteroidal antiinflammatory drugs among healthy individuals. *Circ Cardiovasc Qual Outcomes* 2010;**3**(4):395-405.
38. Stammen LA, Stalmeijer RE, Paternotte E, et al. Training Physicians to Provide High-Value, Cost-Conscious Care: A Systematic Review. *JAMA* 2015;**314**(22):2384-400.
39. Dreischulte T, Donnan P, Grant A, et al. Safer Prescribing--A Trial of Education, Informatics, and Financial Incentives. *N Engl J Med* 2016;**374**(11):1053-64.
40. Oxman AD, Thomson MA, Davis DA, et al. No magic bullets: a systematic review of 102 trials of interventions to improve professional practice. *CMAJ* 1995;**153**(10):1423-31.
41. Wolfe S. Rosuvastatin: winner in the statin wars, patients' health notwithstanding. *BMJ* 2015;**350**:h1388.
42. Lapointe-Shaw L, Fischer HD, Newman A, et al. Potential savings of harmonising hospital and community formularies for chronic disease medications initiated in hospital. *PLoS One* 2012;**7**(6):e39737.
43. Donohue JM, Morden NE, Gellad WF, et al. Sources of regional variation in Medicare Part D drug spending. *N Engl J Med* 2012;**366**(6):530-8.
44. Wettermark B, Persson ME, Wilking N, et al. Forecasting drug utilization and expenditure in a metropolitan health region. *BMC Health Serv Res* 2010;**10**:128.

**Table 1.** Some examples of the 55 individual Wise pieces of advice included in the Wise List since 2005. Categories: (i) choice of medicine – i.e. preferred choice of substance within a group of medicines used for a specific diagnosis, (ii) overtreatment – i.e. avoid using medicines unnecessarily, (iii) under treatment – i.e. reminders to look for and treat conditions that are often inadequately diagnosed and/or treated, or (iv) any other type of general advice related to drug therapy.

| Example of advice                                                                                                                                                          | Category of advice |
|----------------------------------------------------------------------------------------------------------------------------------------------------------------------------|--------------------|
| Use naproxen as first choice when prescribing cox-inhibitors                                                                                                               | Choice of medicine |
| Choose simvastatin for prevention of cardiovascular disease in high-risk patients with normal to medium increased levels of cholesterol.                                   | Choice of medicine |
| Do not use quinolones for treatment of uncomplicated Urinary Tract Infection (UTI) in women                                                                                | Choice of medicine |
| Always give the patient an updated medication list.                                                                                                                        | General advice     |
| Estimate and consider renal function in the selection and dosing of medicines.                                                                                             | General advice     |
| Verify the diagnosis before treating according to the “heart failure treatment ladder” and seek to establish good heart rate control (below 70 beats/min in sinus rhythm). | General advice     |
| Do not treat uncomplicated acute bronchitis with antibiotics.                                                                                                              | Over treatment     |
| Do not treat asymptomatic bacteriuria in the elderly and only culture from urine if the patient is experiencing urinary tract symptoms.                                    | Over treatment     |
| Treatment with proton pump inhibitors is not advisable in the case of stomach pain of unknown cause.                                                                       | Over treatment     |
| Improve antihypertensive treatment: determine a target blood pressure together with the patient, combine medicines more often and follow up.                               | Under treatment    |
| Treat depression to complete remission.                                                                                                                                    | Under treatment    |
| Increase the use of medicines to prevent relapse in alcohol dependence and follow up treatment outcome.                                                                    | Under treatment    |

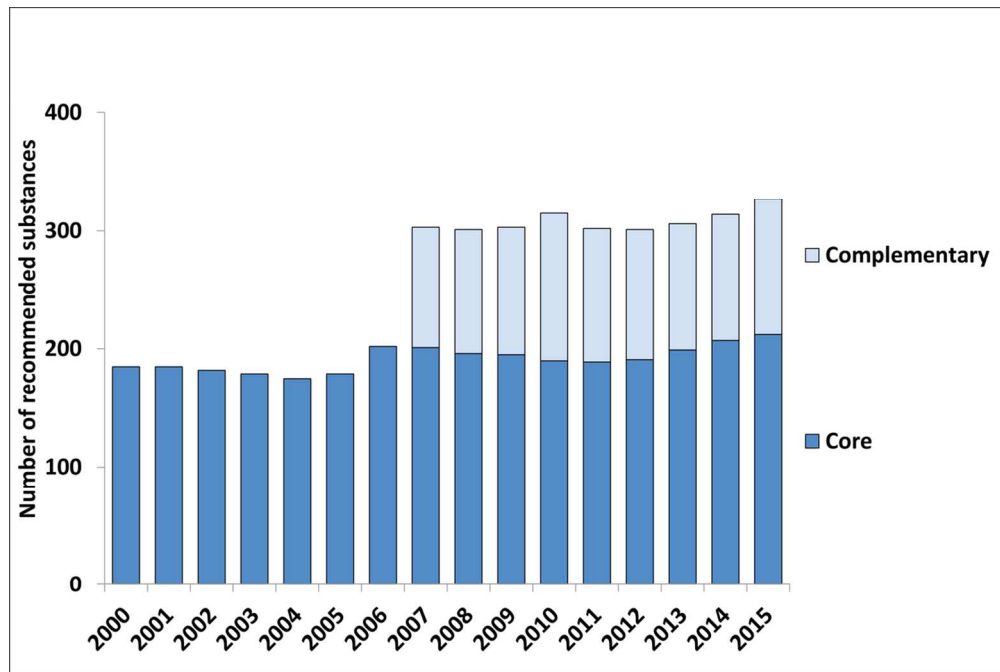

Figure 1. Number of substances included in the Wise List over time. Core medicines = Essential medicines for common illnesses, used both in primary and hospital care. Complementary medicines = Additional essential medicines to be used primarily for specialised care 25.

116x77mm (300 x 300 DPI)

Review only

1  
2  
3  
4  
5  
6  
7  
8  
9  
10  
11  
12  
13  
14  
15  
16  
17  
18  
19  
20  
21  
22  
23  
24  
25  
26  
27  
28  
29  
30  
31  
32  
33  
34  
35  
36  
37  
38  
39  
40  
41  
42  
43  
44  
45  
46  
47  
48  
49  
50  
51  
52  
53  
54  
55  
56  
57  
58  
59  
60

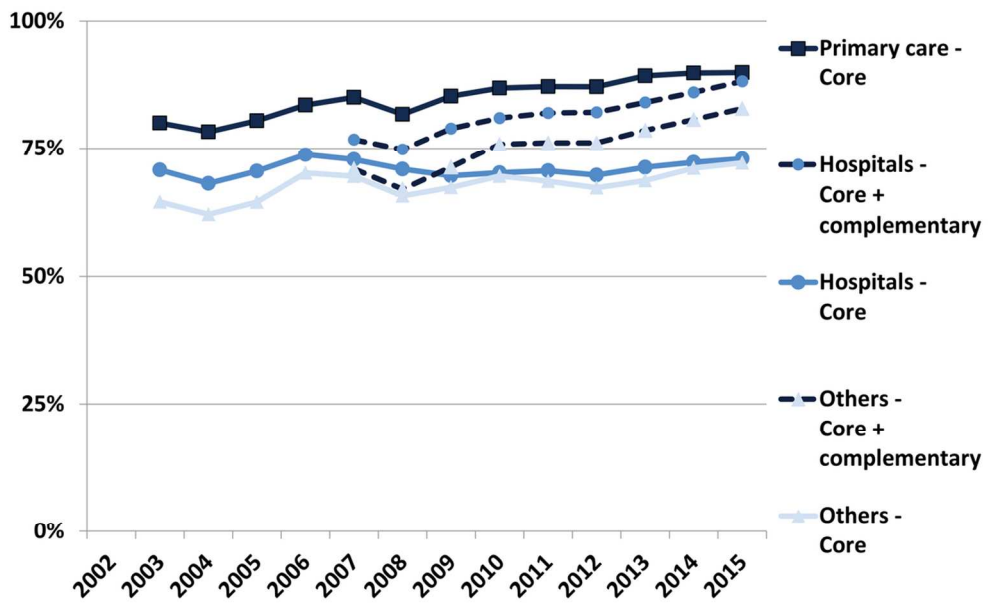

Figure 2. Adherence to recommendations (DU90%) for different prescriber categories between 2001 and 2015 (data on complementary medicines available only from 2007). "Others" includes psychiatry, geriatrics, rehabilitation, school health, occupational health and private practitioners in various specialties.

113x73mm (300 x 300 DPI)

ew only

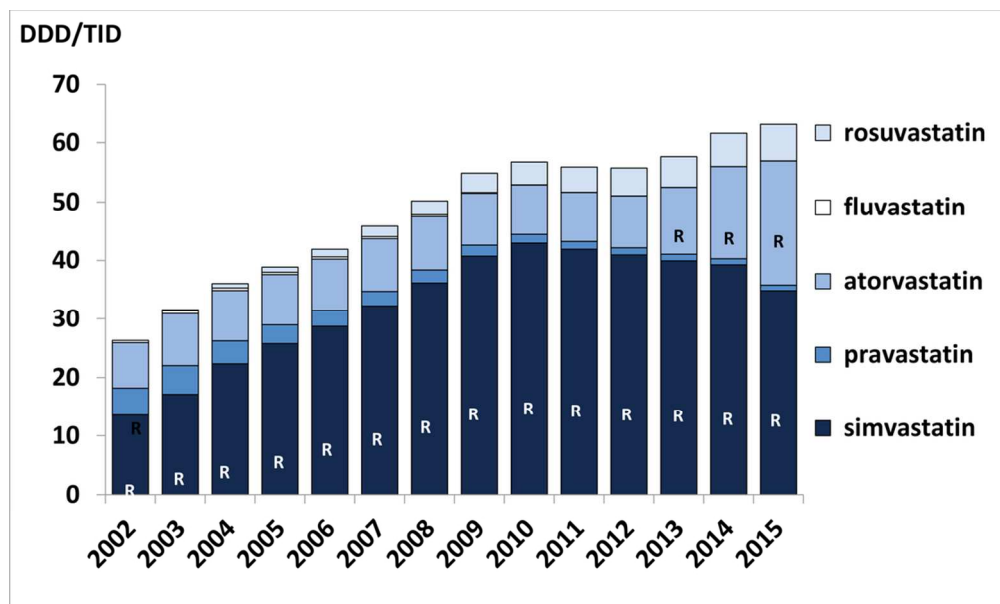

Figure 3. Prescribing patterns for statins in Stockholm Healthcare Region between 2002 and 2015. All prescriptions dispensed to the inhabitants in the region each year. The letter "R" signifies that the drug was recommended in the Wise List that year. DDD/TID = Defined daily dose/1000 inhabitants per day

104x62mm (300 x 300 DPI)

view only

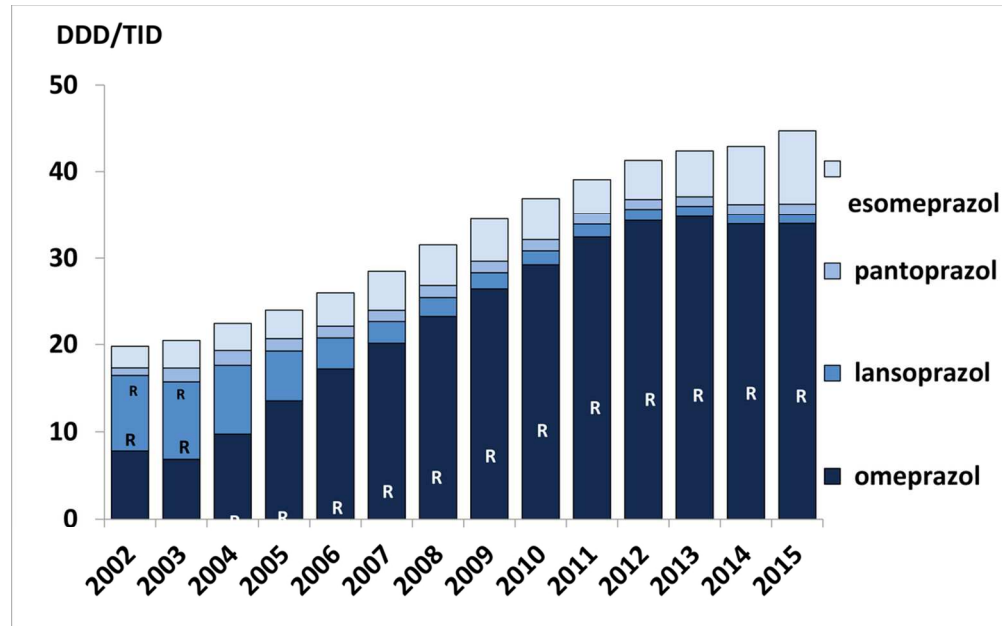

Figure 4. Prescribing pattern for proton pump inhibitors between 2002 and 2015. The letter "R" signifies that the drug was recommended in the Wise List that year. DDD/TID = Defined daily dose/1000 inhabitants per day

108x67mm (300 x 300 DPI)

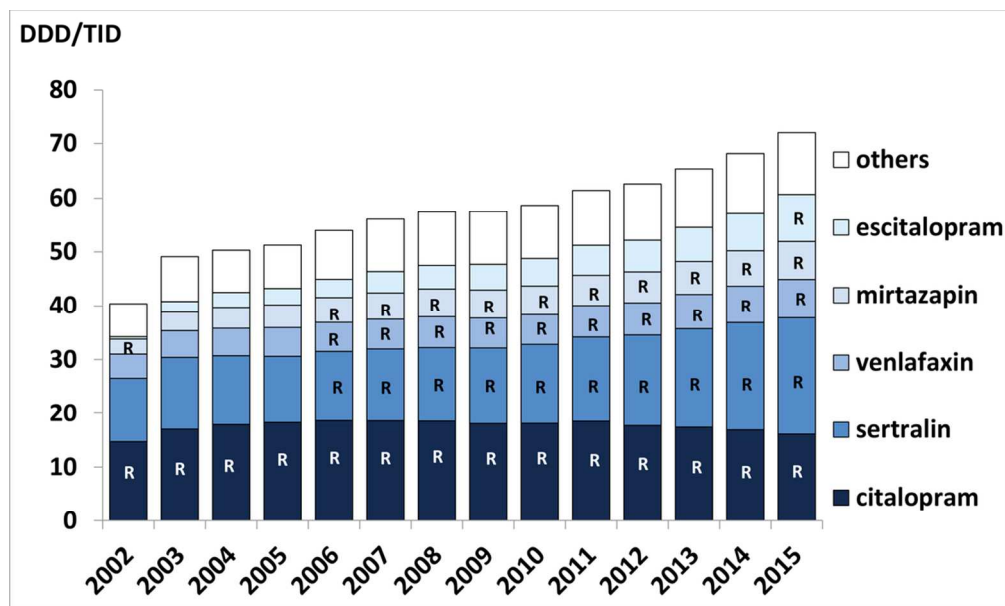

Figure 5. Prescribing pattern for SSRI and SNRI between 2002 and 2015. The letter "R" signifies that the drug was recommended in the Wise List that year. ("Others" includes duloxetine, fluoxetine, paroxetine).  
 DDD/TID = Defined daily dose/1000 inhabitants per day.

104x62mm (300 x 300 DPI)

view only

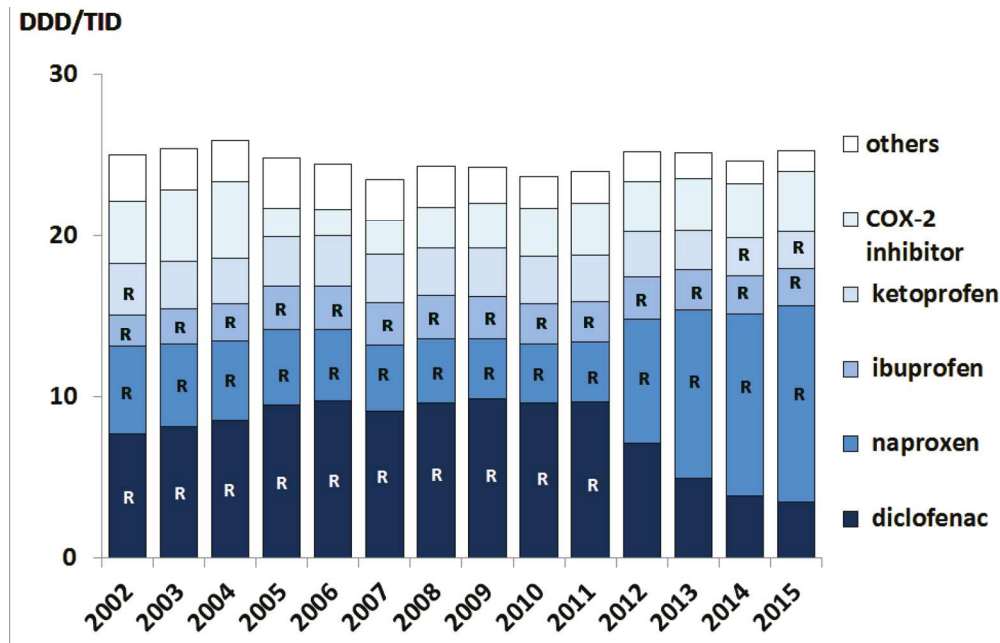

Figure 6. Prescribing pattern for COX-inhibitors between 2002 and 2015. The letter "R" signifies that the drug was recommended in the Wise List that year. ("Others" includes aceclofenac, dexibuprofen, phenylbutazone, indomethacin, ketorolac, lornoxicam, meloxicam, nabumetone, piroxicam, sulindac, tenoxicam). DDD/TID = Defined daily dose/1000 inhabitants per day

159x102mm (300 x 300 DPI)

Review only



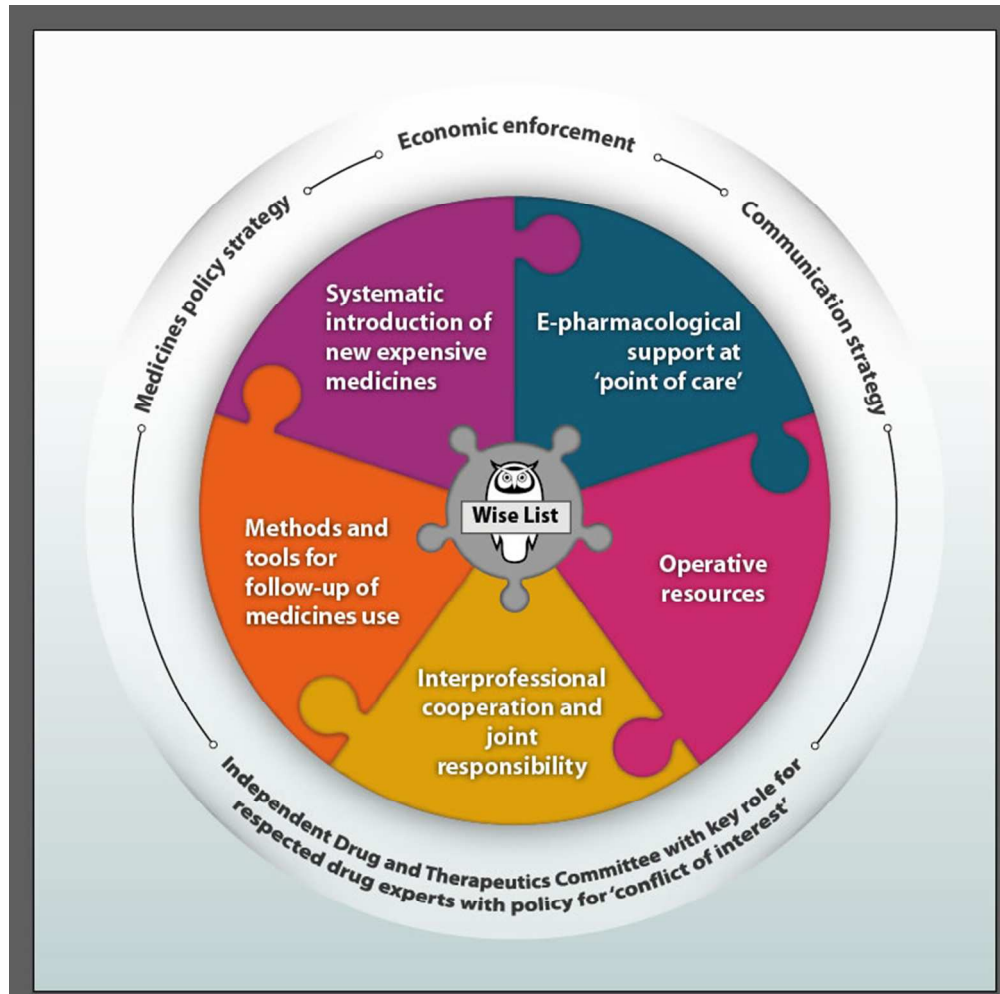

287x285mm (72 x 72 DPI)

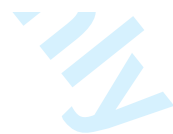

1  
2  
3  
4  
5  
6  
7  
8  
9  
10  
11  
12  
13  
14  
15  
16  
17  
18  
19  
20  
21  
22  
23  
24  
25  
26  
27  
28  
29  
30  
31  
32  
33  
34  
35  
36  
37  
38  
39  
40  
41  
42  
43  
44  
45  
46  
47  
48  
49  
50  
51  
52  
53  
54  
55  
56  
57  
58  
59  
60

1  
2  
3  
4  
5  
6  
7  
8  
9  
10  
11  
12  
13  
14  
15  
16  
17  
18  
19  
20  
21  
22  
23  
24  
25  
26  
27  
28  
29  
30  
31  
32  
33  
34  
35  
36  
37  
38  
39  
40  
41  
42  
43  
44  
45  
46  
47  
48  
49

**SQUIRE 2.0 Checklist**

| Title and Abstract            |                                                                                                                                                                                                                                                                                                               | Comment                                                                                                                                                                                       |
|-------------------------------|---------------------------------------------------------------------------------------------------------------------------------------------------------------------------------------------------------------------------------------------------------------------------------------------------------------|-----------------------------------------------------------------------------------------------------------------------------------------------------------------------------------------------|
| 1. Title                      | Indicate that the manuscript concerns an <b>initiative</b> to improve healthcare (broadly defined to include the quality, safety, effectiveness, patient-centeredness, timeliness, cost, efficiency, and equity of healthcare)                                                                                | Yes, included: <i>High adherence to the "Wise List" treatment recommendations in Stockholm: a 15-year retrospective review of a multifaceted approach promoting rational use of medicines</i> |
| 2. Abstract                   | a. Provide adequate information to aid in searching and indexing<br>b. Summarize all key information from various sections of the text using the abstract format of the intended publication or a structured summary such as: background, local <b>problem</b> , methods, interventions, results, conclusions | a. included<br>b. Yes, all points included except background and local problem (as the abstract has been formatted according to BMJOpen guidelines).                                          |
| Introduction                  | Why did you start?                                                                                                                                                                                                                                                                                            |                                                                                                                                                                                               |
| 3. <b>Problem Description</b> | Nature and significance of the local <b>problem</b>                                                                                                                                                                                                                                                           | In the background, second paragraph, the problem and its significance in the Stockholm Healthcare Region is described.                                                                        |
| 4. Available knowledge        | Summary of what is currently known about the <b>problem</b> , including relevant previous studies                                                                                                                                                                                                             | Described in first and second paragraphs in the background section.                                                                                                                           |
| 5. Rationale                  | Informal or formal frameworks, models, concepts, and/or <b>theories</b> used to explain the <b>problem</b> , any reasons or <b>assumptions</b> that                                                                                                                                                           | Described in the second paragraph of the background                                                                                                                                           |

|                                 |                                                                                                                                                                                                        |                                                                                                                                       |
|---------------------------------|--------------------------------------------------------------------------------------------------------------------------------------------------------------------------------------------------------|---------------------------------------------------------------------------------------------------------------------------------------|
|                                 | were used to develop the <b>intervention(s)</b> , and reasons why the <b>intervention(s)</b> was expected to work                                                                                      |                                                                                                                                       |
| 6. Specific aims                | Purpose of the project and of this report                                                                                                                                                              | Stated in the last sentence of the background.                                                                                        |
| Methods                         | What did you do?                                                                                                                                                                                       |                                                                                                                                       |
| 7. Context                      | Contextual elements considered important at the outset of introducing the <b>intervention(s)</b>                                                                                                       | Explained under “study area” (first section of “material and methods”)                                                                |
| 8. Intervention(s)              | a. Description of the <b>intervention(s)</b> in sufficient detail that others could reproduce it<br>b. Specifics of the team involved in the work                                                      | Explained in “box 1” and “box 2”                                                                                                      |
| 9. Study of the Intervention(s) | a. Approach chosen for assessing the impact of the <b>intervention(s)</b><br>b. Approach used to establish whether the observed outcomes were due to the <b>intervention(s)</b>                        | a. Explained under “data analysis”: three sections explaining each of the three approaches.<br>b. Described in “statistical analysis” |
| 10. Measures                    | a. Measures chosen for studying <b>processes</b> and outcomes of the <b>intervention(s)</b> , including rationale for choosing them, their operational definitions, and their validity and reliability | a. Described under “data sources”                                                                                                     |

1  
2  
3  
4  
5  
6  
7  
8  
9  
10  
11  
12  
13  
14  
15  
16  
17  
18  
19  
20  
21  
22  
23  
24  
25  
26  
27  
28  
29  
30  
31  
32  
33  
34  
35  
36  
37  
38  
39  
40  
41  
42  
43  
44  
45  
46  
47  
48  
49

|                            |                                                                                                                                                                                                                                                                                                            |                                                                                                                                                                                                                                  |
|----------------------------|------------------------------------------------------------------------------------------------------------------------------------------------------------------------------------------------------------------------------------------------------------------------------------------------------------|----------------------------------------------------------------------------------------------------------------------------------------------------------------------------------------------------------------------------------|
|                            | <p>b. Description of the approach to the ongoing assessment of contextual elements that contributed to the success, failure, efficiency, and cost</p> <p>c. Methods employed for assessing completeness and accuracy of data</p>                                                                           | <p>b. Described in the three subsections of “data analysis”</p> <p>c. N/A</p>                                                                                                                                                    |
| 11. Analysis               | <p>a. Qualitative and quantitative methods used to draw inferences from the data</p> <p>b. Methods for understanding variation within the data, including the effects of time as a variable</p>                                                                                                            | <p>a. Described under “statistical analysis”</p>                                                                                                                                                                                 |
| 12. Ethical Considerations | <p>Ethical aspects of implementing and studying the intervention(s) and how they were addressed, including, but not limited to, formal ethics review and potential conflict(s) of interest</p>                                                                                                             | <p>“Described in the section “ethical considerations”</p>                                                                                                                                                                        |
| Results                    | <p>What did you find?</p>                                                                                                                                                                                                                                                                                  |                                                                                                                                                                                                                                  |
| 13. Results                | <p>a. Initial steps of the intervention(s) and their evolution over time (e.g., time-line diagram, flow chart, or table), including modifications made to the intervention during the project</p> <p>b. Details of the process measures and outcome</p> <p>c. Contextual elements that interacted with</p> | <p>a. All results presented as change over time, e.g. all figures</p> <p>b. N/A</p> <p>c. Described where relevant, e.g. under subheading “adherence to specific pharmacotherapeutic areas...” for statins: page 10, line 7.</p> |

|                    |                                                                                                                                                                                                                                                                                                                                                                                                        |                                                                                                                                                 |
|--------------------|--------------------------------------------------------------------------------------------------------------------------------------------------------------------------------------------------------------------------------------------------------------------------------------------------------------------------------------------------------------------------------------------------------|-------------------------------------------------------------------------------------------------------------------------------------------------|
|                    | <p>the <a href="#">intervention(s)</a></p> <p>d. Observed associations between outcomes, interventions, and relevant contextual elements</p> <p>e. Unintended consequences such as unexpected benefits, problems, failures, or costs associated with the <a href="#">intervention(s)</a>.</p> <p>f. Details about missing data</p>                                                                     | <p>d. Described for each of the therapeutic areas on page 10</p> <p>e. Described for each of the therapeutic areas on page 10</p> <p>f. N/A</p> |
| Discussion         | What does it mean?                                                                                                                                                                                                                                                                                                                                                                                     |                                                                                                                                                 |
| 14. Summary        | <p>a. Key findings, including relevance to the <a href="#">rationale</a> and specific aims</p> <p>b. Particular strengths of the project</p>                                                                                                                                                                                                                                                           | <p>a. First paragraph of discussion</p> <p>b. Described on page 12, second paragraph</p>                                                        |
| 15. Interpretation | <p>a. Nature of the association between the intervention(s) and the outcomes</p> <p>b. Comparison of results with findings from other publications</p> <p>c. Impact of the project on people and systems</p> <p>d. Reasons for any differences between observed and anticipated outcomes, including the influence of context</p> <p>e. Costs and strategic trade-offs, including opportunity costs</p> | Described in second and third paragraphs of the discussion.                                                                                     |
|                    |                                                                                                                                                                                                                                                                                                                                                                                                        |                                                                                                                                                 |

1  
2  
3  
4  
5  
6  
7  
8  
9  
10  
11  
12  
13  
14  
15  
16  
17  
18  
19  
20  
21  
22  
23  
24  
25  
26  
27  
28  
29  
30  
31  
32  
33  
34  
35  
36  
37  
38  
39  
40  
41  
42  
43  
44  
45  
46  
47  
48  
49

|                   |                                                                                                                                                                                                                                                                                                                          |                                                   |
|-------------------|--------------------------------------------------------------------------------------------------------------------------------------------------------------------------------------------------------------------------------------------------------------------------------------------------------------------------|---------------------------------------------------|
| 16. Limitations   | <ul style="list-style-type: none"> <li>a. Limits to the generalizability of the work</li> <li>b. Factors that might have limited internal validity such as confounding, bias, or imprecision in the design, methods, measurement, or analysis</li> <li>c. Efforts made to minimize and adjust for limitations</li> </ul> | Described in second paragraph page 12             |
| 17. Conclusions   | <ul style="list-style-type: none"> <li>a. Usefulness of the work</li> <li>b. Sustainability</li> <li>c. Potential for spread to other contexts</li> <li>d. Implications for practice and for further study in the field</li> <li>e. Suggested next steps</li> </ul>                                                      | Described in the last paragraph of the discussion |
| Other information |                                                                                                                                                                                                                                                                                                                          |                                                   |
| 18. Funding       | Sources of funding that supported this work. Role, if any, of the funding organization in the design, implementation, interpretation, and reporting                                                                                                                                                                      | Described in competing interest statement         |

# BMJ Open

## High adherence to the "Wise List" treatment recommendations in Stockholm: a 15-year retrospective review of a multifaceted approach promoting rational use of medicines



|                                 |                                                                                                                                                                                                                                                                                                                                                                                                                                                                                                                                                                                                                                                                                                                                                                                                                                                                                                                                                                                                                                                                                                                                                                                                                                                                                                                                                                                                                        |
|---------------------------------|------------------------------------------------------------------------------------------------------------------------------------------------------------------------------------------------------------------------------------------------------------------------------------------------------------------------------------------------------------------------------------------------------------------------------------------------------------------------------------------------------------------------------------------------------------------------------------------------------------------------------------------------------------------------------------------------------------------------------------------------------------------------------------------------------------------------------------------------------------------------------------------------------------------------------------------------------------------------------------------------------------------------------------------------------------------------------------------------------------------------------------------------------------------------------------------------------------------------------------------------------------------------------------------------------------------------------------------------------------------------------------------------------------------------|
| Journal:                        | <i>BMJ Open</i>                                                                                                                                                                                                                                                                                                                                                                                                                                                                                                                                                                                                                                                                                                                                                                                                                                                                                                                                                                                                                                                                                                                                                                                                                                                                                                                                                                                                        |
| Manuscript ID                   | bmjopen-2016-014345.R1                                                                                                                                                                                                                                                                                                                                                                                                                                                                                                                                                                                                                                                                                                                                                                                                                                                                                                                                                                                                                                                                                                                                                                                                                                                                                                                                                                                                 |
| Article Type:                   | Research                                                                                                                                                                                                                                                                                                                                                                                                                                                                                                                                                                                                                                                                                                                                                                                                                                                                                                                                                                                                                                                                                                                                                                                                                                                                                                                                                                                                               |
| Date Submitted by the Author:   | 28-Nov-2016                                                                                                                                                                                                                                                                                                                                                                                                                                                                                                                                                                                                                                                                                                                                                                                                                                                                                                                                                                                                                                                                                                                                                                                                                                                                                                                                                                                                            |
| Complete List of Authors:       | Eriksen, Jaran; Karolinska Institutet, Division of Clinical Pharmacology, Department of Laboratory Medicine; Karolinska University Hospital, Clinical Pharmacology<br>Gustafsson, Lars; Division of Clinical Pharmacology, Department of Laboratory Medicine, Karolinska Institute<br>Ateva, Kristina; Stockholm Drug and Therapeutics Committee, Public Healthcare Services Committee<br>Rahmner, Pia; Medical Management Centre, Department of Learning, Informatics, Management and Economics (LIME), Karolinska Institutet<br>Håkanson.Ovesjö, Marie-Louise; Karolinska Institutet, Division of Clinical Pharmacology, Department of Laboratory Medicine; Södersjukhuset, Department of Quality and Development<br>Jirlow, Malena; Public Healthcare Services Committee<br>Juhász-Haverinen, Maria; Public Healthcare Services Committee<br>Lärfars, Gerd; Karolinska Institutet, Department of Clinical Science and Education, Internal Medicine, Södersjukhuset<br>Malmstrom, Rickard; Karolinska Institutet, Department of Medicine Solna; Karolinska University Hospital, Department of Clinical Pharmacology<br>Wettermarik, Björn; Karolinska Institutet, Division of Clinical Pharmacology, Department of Laboratory Medicines; Stockholm Drug and Therapeutics Committee<br>Andersén Karlsson, Eva; Karolinska Institutet, Department of Clinical Science and Education, Internal Medicine, Södersjukhuset |
| <b>Primary Subject Heading</b>: | Health services research                                                                                                                                                                                                                                                                                                                                                                                                                                                                                                                                                                                                                                                                                                                                                                                                                                                                                                                                                                                                                                                                                                                                                                                                                                                                                                                                                                                               |
| Secondary Subject Heading:      | Pharmacology and therapeutics, Health policy, Health economics, Evidence based practice                                                                                                                                                                                                                                                                                                                                                                                                                                                                                                                                                                                                                                                                                                                                                                                                                                                                                                                                                                                                                                                                                                                                                                                                                                                                                                                                |
| Keywords:                       | Adherence, Drug and therapeutics committee, Essential medicines, prescribing, Rational Use of Medicines, Health systems                                                                                                                                                                                                                                                                                                                                                                                                                                                                                                                                                                                                                                                                                                                                                                                                                                                                                                                                                                                                                                                                                                                                                                                                                                                                                                |
|                                 |                                                                                                                                                                                                                                                                                                                                                                                                                                                                                                                                                                                                                                                                                                                                                                                                                                                                                                                                                                                                                                                                                                                                                                                                                                                                                                                                                                                                                        |

SCHOLARONE™  
Manuscripts

1  
2  
3  
4  
5  
6  
7  
8  
9  
10  
11  
12  
13  
14  
15  
16  
17  
18  
19  
20  
21  
22  
23  
24  
25  
26  
27  
28  
29  
30  
31  
32  
33  
34  
35  
36  
37  
38  
39  
40  
41  
42  
43  
44  
45  
46  
47  
48  
49  
50  
51  
52  
53  
54  
55  
56  
57  
58  
59  
60

For peer review only



1  
2  
3 **High adherence to the "Wise List" treatment recommendations in Stockholm: a 15-year**  
4 **retrospective review of a multifaceted approach promoting rational use of medicines**  
5  
6

7 Jaran Eriksen\*, researcher and specialty registrar, Division of Clinical Pharmacology,  
8 Department of Laboratory Medicine, Karolinska Institutet and Department of Clinical  
9 Pharmacology, Karolinska University Hospital, SE-14186 Stockholm, Sweden

10 Lars L Gustafsson, professor MD, Division of Clinical Pharmacology, Department of  
11 Laboratory Medicine, Karolinska Institutet and Department of Clinical Pharmacology,  
12 Karolinska University Hospital, SE-14186 Stockholm, Sweden

13 Kristina Ateva, pharmacist, Stockholm Drug and Therapeutics Committee, Public Healthcare  
14 Services Committee, Box 17533, SE-118 91 Stockholm

15 Pia Bastholm-Rahmner, behavioural scientist, Medical Management Centre, Department of  
16 Learning, Informatics, Management and Ethics (LIME), Karolinska Institutet, SE-171 77  
17 Stockholm

18 Marie-Louise Ovesjö, consultant clinical pharmacologist, Division of Clinical Pharmacology,  
19 Department of Laboratory Medicine, Karolinska Institutet and Department of Quality and  
20 Development, Södersjukhuset, SE-118 83 Stockholm, Sweden.

21 Malena Jirlow, communication strategist, Public Healthcare Services Committee, Box 17533,  
22 SE-118 91 Stockholm

23 Maria Juhasz-Haverinen, pharmacist, Public Healthcare Services Committee, Box 17533, SE-  
24 118 91 Stockholm

25 Gerd Lärfars, associate professor, senior consultant, Department of Clinical Science and  
26 Education, Södersjukhuset, Internal Medicine, Karolinska Institutet, SE-118 83 Stockholm,  
27 Sweden

28 Rickard Malmström, associate professor, senior consultant, Department of Clinical  
29 Pharmacology, Karolinska University Hospital & Department of Medicine Solna, Karolinska  
30 Institutet, SE-17176 Stockholm, Sweden

31 Björn Wettermark, pharmacist, associate professor, Division of Clinical Pharmacology,  
32 Department of Laboratory Medicine, Karolinska Institutet at Karolinska University Hospital,  
33 Stockholm and Drug and Therapeutics Committee, SE-102 39 Stockholm

34 Eva Andersén-Karlsson, associate professor, senior consultant, Department of Clinical  
35 Science and Education, Södersjukhuset, Internal Medicine, Karolinska Institutet, SE-118 83  
36 Stockholm, Sweden

37  
38  
39  
40  
41  
42  
43  
44  
45  
46  
47  
48 On behalf of the Stockholm Drug and Therapeutics Committee: Tareq Alsaody, Peter  
49 Aspelin, Peter Bárány, Harry Beitner, Johan Bratt, Torkel B Brismar, Marja-Liisa Dahl,  
50 Ulrika Dahnell, Paulina Dalemo, Christine Fransson, Stina Fransson Sellgren, Jan  
51 Hasselström, Roger Henriksson, Rose Marie Hallin, Paul Hjemdahl, Margareta Holmström,  
52 Charlotte Höybye, Thomas Kahan, Inga Klarin, Angelica Lindén Hirschberg, Synnöve  
53 Lindemalm, Mikael Lördal, Mussie Msghina, Ricard Nergårdh, Christer Norman, Åke  
54 Örtqvist, Peter Persson, Magnus Røjvall, Michael Runold, Carl-Olav Stiller, Marie Almvik  
55 (Sundström), Leif Tallstedt, Inga Tjäder, Mia von Euler, Rumiana Zlatewa.  
56  
57  
58  
59  
60

1  
2  
3  
4 \*Corresponding author: Jaran Eriksen, Division of Clinical Pharmacology, Department of  
5 Laboratory Medicine, Karolinska Institutet at Karolinska University Hospital, SE-141 86  
6 Stockholm, Sweden. E-mail: [jaran.eriksen@ki.se](mailto:jaran.eriksen@ki.se)  
7  
8  
9  
10

11 **Key words:**

12 Adherence, drug and therapeutics committee. essential medicines, prescribing, guidelines,  
13 health systems, rational use of medicines  
14  
15  
16  
17  
18  
19  
20  
21  
22  
23  
24  
25  
26  
27  
28  
29  
30  
31  
32  
33  
34  
35  
36  
37  
38  
39  
40  
41  
42  
43  
44  
45  
46  
47  
48  
49  
50  
51  
52  
53  
54  
55  
56  
57  
58  
59  
60

## Abstract

**Objectives:** To present the “Wise List” (a formulary of essential medicines for primary and specialised care in Stockholm Healthcare Region) and assess adherence to the recommendations over a 15-year period.

**Design:** Retrospective analysis of all prescription data in the Stockholm Healthcare Region between 2000 and 2015 in relation to the Wise List recommendations in the same time period.

**Setting:** All outpatient care in the Stockholm Healthcare Region.

**Participants:** All prescribers in the Stockholm Healthcare Region

**Main outcome measures:** The number of core and complementary substances included in the Wise List, the adherence to recommendations by Anatomic Therapeutic Chemical (ATC) 1<sup>st</sup> level using Defined Daily Doses (DDDs) adjusted to the DDD for 2015, adherence to recommendations over time measured by dispensed prescriptions yearly between 2002 and 2015.

**Results:** The number of recommended core substances was stable (175 to 212). Overall adherence to the recommendations for core medicines for all prescribers increased from 77% to 84% (2001 to 2015). The adherence to recommendations in primary care for core medicines increased from 80% to 90% (2005 to 2015) with decreasing range in practice variation (32% to 13%). Hospital prescriber adherence to core medicine recommendations was stable but increased for the combination core and complementary medicines from 77% to 88% (2007 to 2015). Adherence varied between the four therapeutic areas studied.

**Conclusions:** High and increasing adherence to the Wise List recommendations was seen for all prescriber categories. The transparent process for developing recommendations involving respected experts and clinicians using strict criteria for handling potential conflicts of interests, feedback to prescribers, continuous medical education and financial incentives are possible contributing factors. High quality evidence based recommendations to prescribers, such as the Wise List, disseminated through a multifaceted approach, will become increasingly important and should be developed further to include recommendations and introduction protocols for new expensive medicines.

**Strengths of the study:**

- The study data covers all prescriptions for the Stockholm Healthcare Region (population 2.2 million)
- The study includes all care providers in the Stockholm Healthcare Region

**Limitations of the study:**

- The study does not include a control group
- A causal relationship between the guidelines and the seemingly high adherence cannot be determined

For peer review only

## Background

Inappropriate use of medicines increases the risk of therapeutic failure, adverse events, antimicrobial resistance, and is a waste of resources.<sup>1-6</sup> This recognition was a driving force behind the establishment of Drug and Therapeutics Committees (DTC)<sup>7-9</sup> and the Essential Medicines concept<sup>10</sup> introduced by the World Health Organization (WHO) in the 1970s. DTCs select medicines based on scientific evidence and influence physician prescribing to achieve rational use of medicines (RUM).<sup>8 10 11</sup> As part of their strategies, DTCs develop treatment guidelines and formularies but changing behaviour takes time and adherence to recommendations varies among prescribers and is surprisingly poor in most cases.<sup>12 13</sup> Consequently, new models need to be developed and evaluated to provide trust and adherence to recommendations of essential medicines throughout the healthcare system.

In 1996 a new Swedish law stipulated that each healthcare region should have at least one DTC to issue guidelines/recommendations and promote RUM.<sup>8</sup> This law has been essential as a platform and base for gaining trust in and assuring resources for DTCs in Stockholm. Six years after introduction of the law medicines budgets were devolved from the national to the regional level.<sup>14</sup> These changes prompted new ways to communicate independent prescribing recommendations such as the “Wise List” concept of essential medicines for common diseases introduced in Stockholm (Box 1).<sup>15</sup> The concept was designed based on the understanding that prescribing recommendations should be issued in one version for the whole region irrespective of whether patients were treated in primary or in specialised care in public or private facilities. Furthermore, a key consideration was that the recommendations have to be based on evidence and should be issued jointly by respected experts and clinicians with an aim to enhance quality of care.<sup>8 11 15-18</sup> The Wise List concept was developed knowing that multifaceted contextualized methods are needed to implement recommendations. Such strategies may include professional ownership, continuous medical education, active dissemination, “point-of-care” access to independent information about medicines as well as feedback of prescribing patterns to physicians using modern Information Communication Technology (ICT).<sup>17 19</sup> These concepts were all applied in what was introduced as the “Stockholm Model for Wise Use of Medicines” (Box 2). The Stockholm Healthcare Region had five local DTCs with their own formularies from 1980s to 1999, but a joint formulary for the entire Stockholm Healthcare Region was first issued by the regional coordinating DTC in 2000.<sup>15</sup> The Wise List concept has since then continuously improved to reach a mature design and work process. In 2008 a minor financial incentive was introduced for primary health care centres (PHCs) meeting agreed prescribing targets and writing an annual quality report.<sup>14</sup> Since its launch the Wise List concept has been further refined to address the increasing challenge to manage the introduction of new expensive medicines as well as to reduce the negative environmental impact of medicines.<sup>20</sup>

Due to increasing costs for developing medicines, generic competition and the strained global healthcare budgets, pharmaceutical companies have changed their focus from blockbuster medicines to niched orphan drugs that have a potential to generate more revenue.<sup>21</sup> At the same time, there is growing evidence that the pharmaceutical industry influences prescriber

practices,<sup>22,23</sup> but healthcare funders and medical professionals are increasingly implementing measures to minimise negative consequences of this.<sup>24</sup> In the context of the changing medicines market the need for independent, evidence-based information for prescribers becomes increasingly important. To our knowledge there have been no scientific evaluations of health system wide interventions aiming to tackle this challenge. It is therefore important to evaluate the effects of such work done to further refine strategies for optimising use of medicines. The objective of this paper is to describe the content of the “Wise List” since its launch and to assess prescribers’ adherence to the recommendations over a 15-year period.

#### Box 1: The Wise List concept<sup>20</sup>

- The Wise List (“Kloka Listan” in Swedish) was developed for the whole Stockholm Healthcare Region in 2000 (the name “Wise List” was launched in 2001)
- Includes around 200 recommended core medicines for the treatment of common diseases in primary and hospital care
- Includes 100 complementary medicines for common diseases in specialised care (since 2007)
- Covers 24 therapeutic areas
- Is a pocket-sized booklet and also available in a web-version
- Respected experts and clinicians together with clinical pharmacologists, pharmacists and nurses agree on recommendations based on review of scientific evidence using transparent criteria, including cost-effectiveness evaluation
- Is a joint effort across disciplines and institutions and includes a policy for conflict of interest with annually renewed declarations. This policy contains rules and regulations for definitions of conflict of interest and how to handle them<sup>25</sup>
- Includes non-pharmacological advice for several therapeutic areas. For some therapeutic areas there are step-wise recommendations linked to disease severity and concomitant diseases.
- The Wise List also includes around 10 “Wise piece of advice” (short, focussed messages) selected yearly to improve certain pharmacotherapeutic practices for which there are potential for improvement in quality of medicine use, e.g. “*Do not treat uncomplicated acute bronchitis with antibiotics*”
- The Wise List is communicated through a comprehensive communication, branding and marketing strategy with experts in a key role and integrated with a program for continuous medical education<sup>15,18</sup> (Box 2)

#### Definitions used in this paper

*Core medicines* = Essential medicines for common illnesses, recommended both for primary and specialised care.

*Complementary medicines* = Additional essential medicines to be recommended primarily for specialised care.

These definitions are based on the WHO model list of essential medicines.<sup>26</sup>

## Material and methods

### *Study area*

This study was conducted in Stockholm Healthcare Region with approximately 2.2 million inhabitants served by more than 200 PHCs, seven emergency hospitals as well as geriatric clinics, psychiatric services, private specialists, nursing homes and other healthcare providers (e.g. occupational health, school health, rehabilitation). Swedish healthcare is financed through public taxation with limited patient co-payment for prescribed medicines and health care visits.<sup>27</sup>

### *Data sources*

The number of different substances recommended as core or complementary medicines was collected from a database of the contents of the “Wise List” from 2000 to 2015. Data are presented by therapeutic area ATC 1st level and year.<sup>28</sup> The year 2000 was chosen as the initial year of observation as the first joint list of recommendations for the whole region was launched that year.

We also compiled all “Wise pieces of advice” (short messages aimed at improving pharmacotherapy (Box 1)), from each edition of the “Wise List”.

Data on dispensed prescriptions were collected from the Swedish Prescribed Drug Register. In addition to the prescriptions, the register contains patient demographics (age, sex and area of residence of the patient) as well as information about the unit where the prescription was issued.<sup>29</sup>

### *Data analysis*

#### *Number of substances and the Wise pieces of advice*

The number of substances included in the Wise List each year was calculated and presented according to their classification as core or complementary medicines.

The Wise pieces of advice were grouped within four areas, i.e.: (i) choice of medicine – i.e. preferred choice of substance within a group of medicines used for a specific disease, (ii) overtreatment – i.e. avoid using medicines unnecessarily, (iii) under treatment – i.e. reminders to test for and treat conditions that are under diagnosed and/or under treated in the Stockholm region, or (iv) any other type of general advice related to RUM.

#### *Adherence to recommendations*

Data were analysed by ATC using Defined Daily Doses (DDDs) adjusted to correspond to the DDD for the year 2015.<sup>28,30</sup> The year 2002 was chosen as baseline since a national regulation for mandatory generic substitution resulting in substantial price reductions for generics was introduced in October that year, thus changing the pharmaceutical market substantially.<sup>14,31</sup>



1  
2  
3 Separate analyses on the overall adherence were also made for each individual PHC in 2005,  
4 2010 and 2015 to assess to what extent variation between practices had changed over time.  
5

6 Data on prescriptions were analysed with respect to the overall adherence to the Wise List  
7 recommendations – both for all prescribers and by category (primary care, outpatient hospital  
8 care and others). The category others included psychiatry, geriatrics, rehabilitation, school  
9 health, occupational health and private practitioners of various specialities. Data on prescriber  
10 category of were available from 2003.  
11  
12

### 13 *Change over time in adherence to recommendations*

14 Adherence to recommendations was measured based on all dispensed prescriptions in  
15 Stockholm Healthcare Region each year between 2002 (when prescriber work place ID was  
16 added to the Swedish Prescribed Drug Register) and 2015. We also studied adherence to the  
17 guidelines in four different pharmacotherapeutic areas: (1) proton pump inhibitors (PPIs), (2)  
18 COX-inhibitors, (3) statins and (4) selective serotonin receptor uptake inhibitors (SSRI) or  
19 serotonin-noradrenaline reuptake inhibitors (SNRI). These medicines were selected as there  
20 were specific “Wise pieces of advice” relating to these groups of medicines during the study  
21 period. The Wise pieces of advice concerning these pharmacotherapeutic areas were  
22 warranted either because of safety concerns or because there was a need to counteract  
23 commercial pressure on physicians to prescribe new, less cost-effective treatments.<sup>32 33</sup>  
24  
25  
26  
27  
28  
29

### 30 **Statistical analyses**

31 Descriptive statistics were used including numbers and proportions expressed in percentages  
32 for different groups. The adherence to the Wise List was measured using the Drug Utilization  
33 90% (DU 90%) method.<sup>34</sup> This method is recommended by the WHO for drug utilization  
34 studies and defines the number of different substances (ATC 5th level) constituting 90% of  
35 the volume expressed in DDDs and the adherence to recommendations within this segment.<sup>34</sup>  
36 Note that the calculated adherence rate is not linked to data on diagnosis of the patient, but  
37 shows the amount of the substances prescribed for each specific ATC group of substances on  
38 the Wise List. E.g. for ATC A02BC (PPI), if a substance recommended on the Wise List is  
39 prescribed it is considered adherent to the Wise List recommendation. This method is  
40 routinely used in the Stockholm region to monitor the adherence to the Wise List  
41 recommendations as well as to provide feedback to prescribers forming the basis for local  
42 quality assessment and continuous medical education.<sup>19 35</sup>  
43  
44  
45  
46  
47

48 Variation in adherence rates between practices was calculated using the extremal quotient  
49 (ratio of maximum to minimum value).  
50

51  
52 All data were analysed using the statistical package SAS version 9.4 (SAS Institute, Cary,  
53 NC) and Microsoft Excel 2010.  
54

### 55 **Ethical considerations**



1  
2  
3 This work was based on routinely available aggregate prescribing information from databases  
4 used for monitoring healthcare with no possibility to identify individual patients or  
5 prescribers. The analyses were part of ongoing quality improvement work at Stockholm  
6 Healthcare Region. All data analyses complied with Swedish Personal Data Act and no  
7 application for approval by the Regional Institutional Review Board was therefore needed.  
8  
9

## 11 Results

### 12 *Number of substances included as recommendations in the Wise List over time*

13 The number of recommended core medicines in the Wise List was relatively stable over the  
14 years, fluctuating between 175 and 212 substances. Complementary medicines were included  
15 in the Wise List from 2007 and have remained at around 100 substances since then (fig. 1).  
16  
17

### 18 *Categories of Wise pieces of advice*

19 The concept of Wise pieces of advice was introduced in 2003. There have been around 10  
20 individual pieces of advice every year, comprising in total 55 unique messages. Some advice  
21 were only included in the list for one year, whereas 20 of the advice have been included for 3  
22 years or more. Most advice (n=19) addressed choice of medicine within a class, the remaining  
23 concerned general advice (n=14), over treatment (n=12) or under treatment (n=10). The  
24 pharmacotherapeutic areas with the highest number of Wise pieces of advice were  
25 cardiovascular diseases (n=9), infectious diseases (n=8), general/geriatric (n=7), psychiatry  
26 and pain treatment (both n=7). Examples of advice are listed in table 1.  
27  
28  
29  
30

### 31 *Overall adherence to the Wise List*

32 The overall adherence to the Wise List recommendations for core medicines for all  
33 prescribers (primary and specialised care) in the region increased steadily from 77% in 2001  
34 to 84% in 2015. The adherence rates differed between prescriber categories, but increased for  
35 all of them.  
36  
37  
38

39 The adherence to recommendations in primary care for core medicines increased from 80% in  
40 2005 to 90% in 2015 (fig 2) and showed a decreasing range in variation between practices  
41 over time from 32% (57% to 89%) in 2005, 26% (69% to 95%) in 2010 to 13% (84% to 97%)  
42 in 2015. The extremal quotient showed a significant reduction from 1.6 in 2005, 1.4 in 2010  
43 to 1.3 in 2015.  
44  
45

46 For prescribers at hospitals the adherence to core medicine recommendations was stable from  
47 2003 to 2015 (71% to 73%) but increased for the combination core plus complementary  
48 medicines between 2007 and 2015 from 77% to 88%. For all other prescriber categories the  
49 adherence increased over the time periods both for core (65% to 72%) and for the  
50 combination core plus complementary medicines (71% to 83%) (fig 2).  
51  
52  
53

### 54 *Adherence to specific pharmacotherapeutic areas in the Wise List*

55 Statins: Wise pieces of advice for statins have been included in the Wise List most years since  
56 its launch. The recommendation has been both to increase the use of statins in high-risk  
57  
58  
59  
60

1  
2  
3 patients, as well as to choose simvastatin. Simvastatin had good documentation and low price  
4 due to patent expiry already in 2003 and was, before patent expiry of atorvastatin, considered  
5 more cost-effective than the other statins.<sup>36</sup> The volumes of statins increased throughout the  
6 period and simvastatin was the dominating substance. Prescribing of other statins remained at  
7 a low level but when the patent for atorvastatin expired and less expensive generics became  
8 available, the Wise List included this substance among the recommended ones (from 2013),  
9 which is also reflected in higher volumes of atorvastatin prescriptions dispensed (fig 3).  
10  
11

12 PPIs: There have been several Wise pieces of advice related to the use of PPIs in the Wise  
13 List over the study period. These have aimed to decrease unnecessary use of PPIs, as well as  
14 recommending omeprazole (and pantoprazole and lansoprazole in 2002-2003) instead of other  
15 less cost-effective PPIs. Despite this, volumes of PPIs more than doubled between 2002 and  
16 2015 to the equivalent of 4.5% of the population constantly treated with PPIs with the vast  
17 majority of prescriptions for omeprazole (fig 4).  
18  
19

20  
21 SSRI/SNRI: Due to strong marketing pressure from the industry to prescribe the S-  
22 enantiomer of citalopram (escitalopram),<sup>37</sup> a Wise piece of advice was introduced in 2011  
23 recommending the prescriber to use either citalopram or sertraline for patients in need of  
24 pharmacological treatment of depression. Citalopram and sertraline dominated the treatment  
25 throughout the period, but prescriptions for all other antidepressants have also increased (fig  
26 5).  
27  
28

29  
30 COX-inhibitors: In 2012 the Wise List changed its recommendation from diclofenac to  
31 naproxen based on accumulated evidence indicating an increased risk for cardiovascular  
32 events in patients using diclofenac.<sup>38</sup> A rapid change in prescribing patterns was observed  
33 with a marked decrease in diclofenac prescribing with a corresponding increase for naproxen  
34 (figure 6).  
35  
36  
37

## 38 Discussion

39  
40 This study demonstrates high adherence to the Wise List recommendations in the Stockholm  
41 Healthcare Region. The overall adherence rate increased steadily over time, but with  
42 variations between therapeutic areas. Additionally the number of recommended core  
43 substances has been kept stable (around 200 substances) for the 15 years since the  
44 introduction of the Wise List despite the number of substances with market authorisation in  
45 Sweden increasing from 1235 to 1554 in the same time period.<sup>39</sup> A limited number of  
46 recommendations is critical to make it feasible for prescribers to choose the best therapies for  
47 their patients, keeping knowledge up to date among prescribers about the clinical  
48 pharmacology and pharmacotherapeutic characteristics of each recommended medicine.<sup>8 9 15</sup>  
49  
50  
51  
52

53  
54 High adherence to the Wise List recommendations was seen across all therapeutic areas both  
55 in primary and hospital care. There could be several reasons for this. We consider that the  
56 transparent development process of recommendations involving respected experts and  
57 clinicians within different therapeutic areas and strict criteria for handling potential conflicts  
58  
59  
60

of interests are essential for the high success rates to recommendations.<sup>15 40</sup> Financial incentives were introduced in Stockholm healthcare region in 2008<sup>14</sup> and have also been shown to contribute to the high adherence.<sup>35</sup> Originally, these incentives were introduced in primary care where PHCs received a small bonus linked to their adherence to the Wise List if the adherence was more than 80% and if they reflected on their prescribing patterns in a “quality report”.<sup>35</sup> A higher target has not been set, as complete adherence is not considered suitable. This is because the Wise List does not include all possible treatment strategies for e.g. complicated cases, patients with allergies to medicines, or cases with potential drug-drug interactions. Physicians should have the possibility of using their clinical judgment and prescribe a substance not included on the Wise List if this is better for the patients. Therefore, complete adherence is neither wanted nor aimed for. Since 2008 core Wise List medicines (about 200) are free of charge for all hospitals, whereas they have to fund 50% of the cost of all other prescribed medicines. Previously the healthcare region covered all costs for prescriptions across hospitals and healthcare institutions centrally. Sound and trusted evidence based guidelines in combination with a communication strategy consisting of a branding and marketing strategy for both prescribers and the public, integrated with a program for continuous medical education, are major factors for successful adherence to DTC recommendations. In Stockholm this communication strategy and the continuous medical education programme is an ongoing, continuously evolving important part of the Wise List strategy.<sup>18</sup> The branding and marketing strategy is based on principles of social marketing. Core values of the brand Wise List have been defined as a shortlist of the best medicines, set up by respected experts and clinicians, for the best treatment of the most common diseases. This is in contrast to the marketing material provided by pharmaceutical industry. The Wise List has been promoted to prescribers and patients by traditional marketing methods such as ads in print, direct mail marketing like postcards, brochures, letters, and fliers and at oral presentations among stakeholders. The core value of the product has been consistent over the years and so also the key message in the marketing campaigns<sup>14,15,18</sup>. Prescriber ownership of the strategy has strengthened the Wise List work in developing and adopting state-of-the-art recommendations.<sup>11-13 15 16</sup> Multifaceted interventions, academic detailing and reminders have all been found to be effective.<sup>16 41 42</sup>

Our findings from the specific therapeutic areas demonstrate that the prescribers switched substances within a therapeutic area and reduced under treatment in accordance with the Wise List and Wise pieces of advice. However, the list has not been successful in reducing overtreatment. The failure in reducing PPI use is in concordance with other European countries where prescribing of PPI has also increased several-fold.<sup>32</sup> In contrast, there was a marked switch in COX-inhibitor prescriptions from diclofenac to naproxen after a change of recommendations in the 2012 Wise List edition. An important explanation for the difference in adherence between these therapeutic areas may be the fact that using omeprazole has no clear medical disadvantage. The reason for switching from diclofenac to naproxen was accumulated evidence showing increased risk of cardiovascular disease with diclofenac,<sup>38</sup> which was clearly accepted by clinicians. Similar to the findings for COX-inhibitors the prescribers followed the recommendations for statins and SSRI/SNRI to a high degree and the prescribing of non-recommended escitalopram was low despite high marketing pressure

1  
2  
3 similar to that of esomeprazole.<sup>37</sup> This marketing pressure from the pharmaceutical industry  
4 could have contributed to the failure in reducing PPI prescriptions, but despite increasing  
5 numbers of prescriptions, the vast majority remained omeprazole, as recommended by the  
6 Wise List. The adherence to the recommendation to use simvastatin instead of atorvastatin or  
7 rosuvastatin resulted in substantial economical savings for the Stockholm Health Care Region  
8 in contrast to other countries where rosuvastatin was the most prescribed statin.<sup>43</sup> To illustrate  
9 this, if just 10% of the simvastatin DDD had been replaced by rosuvastatin in 2008 this would  
10 have increased costs by 14.4 million SEK (1 SEK ~ 0.1 € in 2008). This is similar to a  
11 Canadian study of publically funded outpatient medicines where implementing harmonised  
12 prescribing recommendations could save pharmaceutical cost.<sup>44</sup> Regional differences in  
13 medicine costs within the Medicare system in the US have been shown to depend on the  
14 medicines selected for the formulary.<sup>45</sup>  
15  
16  
17  
18

19 Although we can relate prescribing data to the content of the Wise List and the Wise pieces of  
20 advice, without a control group we cannot know whether the seemingly high adherence is in  
21 fact due to a causal relationship between these factors. However, a major strength of the study  
22 is that we have data for a whole region, including all prescriptions from all care providers.  
23  
24  
25

26 New niche medicines, soaring medicine costs and limited budgets pose new challenges to  
27 health care systems globally. Furthermore, the large number of new expensive biological  
28 medicines in pipeline has highlighted the importance of priority setting and development of  
29 methods to monitor the adherence to the recommendations,<sup>46</sup> and high quality evidence based  
30 recommendations to prescribers, such as the Wise List, become increasingly important. This  
31 is in line with the Lancet's Commission on Essential Medicines Policies' recommendations  
32 for achieving Sustainable Development Goal 3.8 for universal access to safe, effective,  
33 quality and affordable essential medicines and vaccines.<sup>47</sup> The Wise List already contains  
34 recommendations for some new expensive biological medicines, e.g. TNF inhibitors for use  
35 in inflammatory bowel disease and rheumatologic diseases. In our opinion, it is of critical  
36 importance that trusted recommendations and introduction protocols are developed for the use  
37 of new expensive medicines. A DTC/Wise List with focus on and with recommendations for  
38 specialised healthcare is necessary to ensure cost-effective and egalitarian use of medicines in  
39 the future. In fact, a recent study of ours demonstrated that the most important factor  
40 influencing use of anticoagulants, warfarin or a New Oral Anticoagulants, in Stockholm  
41 during the last five years was whether the substance was included as a Wise List  
42 recommendation.<sup>48</sup> New multifaceted methods for safe and successful evidence-based  
43 introduction of medicines must be developed. This will be a major challenge for the future but  
44 could build on components in the Wise List concept that has led to high adherence to  
45 recommendations sustained for 15 years.  
46  
47  
48  
49  
50  
51

#### 52 53 54 **Acknowledgments**

55 The authors would like to thank Stockholm Healthcare Region for providing time for experts  
56 to evaluate the data making completion of this study possible.  
57  
58  
59  
60

### Competing Interest Statement

All authors have completed the ICMJE uniform disclosure form at [http://www.icmje.org/coi\\_disclosure.pdf](http://www.icmje.org/coi_disclosure.pdf) and declare: no support from any organisation for the submitted work and no financial relationships with any organisations that might have an interest in the submitted work in the previous three years. Jaran Eriksen is member of an expert panel of the Stockholm DTC since 2013. Kristina Ateva, Pia Bastholm-Rahmner, Maria Juhasz-Haverinen, Malena Jirlow, Marie-Louise Ovesjö, Björn Wettermark are employed by Stockholm Healthcare Region that finances the Drug and Therapeutics Committee (DTC) issuing the “Wise List” in Stockholm. Eva Andersén-Karlsson served as chair-woman of Stockholm DTC 2010-2016, Lars L Gustafsson as chairman 2000-2009 and Gerd Lärfars is chair woman since 2016 and Rickard Malmström deputy chairman since 2016.

The co-authors and collaborators: Tareq Alsaody, Peter Aspelin, Peter Bárány, Harry Beitner, Johan Bratt, Torkel B Brismar, Marja-Liisa Dahl, Ulrika Dahnell, Paulina Dalemo, Christine Fransson, Stina Fransson Sellgren, Jan Hasselström, Roger Henriksson, Rose Marie Hallin, Paul Hjemdahl, Margareta Holmström, Charlotte Höybye, Thomas Kahan, Inga Klarin, Angelica Lindén Hirschberg, Synnöve Lindemalm, Mikael Lördal, Mussie Msghina, Ricard Nergårdh, Christer Norman, Åke Örtqvist, Peter Persson, Magnus Røjvall, Michael Runold, Carl-Olav Stiller, Marie Almvik (Sundström), Leif Tallstedt, Inga Tjäder, Mia von Euler, Rumiana Zlatewa are either present member of Stockholm DTC or chairing one of the 21 expert panels of Stockholm DTC. None of the authors or collaborators listed here have received any salary or economic support for the research presented in this work.

### Data sharing

We have used routinely available prescribing data for a selected group of therapeutic classes. More analyses can be made for these medicines as well as for other medicines prescribed in Sweden.

### Contributorship statement

JE contributed to the conception and design of the study, analysis and interpretation of the data, drafted and revised the manuscript. LLG contributed to the conception and design of the study, analysis and interpretation of the data, and revised the manuscript. KA contributed to data acquisition, analysis and interpretation, and revised the manuscript. PBR contributed to data analysis and interpretation, and revised the manuscript. BW contributed to the conception and design of the study, data acquisition, analysis and interpretation of the data, and revised the manuscript. MJ contributed to data analysis and interpretation, and revised the manuscript. MJH contributed to the data acquisition, analysis and interpretation of the data, and revised the manuscript. RM contributed to the conception and design of the study, analysis and interpretation of the data, and revised the manuscript. MLHO contributed to the conception and design of the study, analysis and interpretation of the data, and revised the manuscript. GL contributed to data analysis and interpretation, and revised the manuscript. EAK



contributed to the conception and design of the study, analysis and interpretation of the data, and revised the manuscript. All authors critically revised and approved the final manuscript.

### Funding statement

This study was in part supported by grants from Karolinska Institutet, Stockholm, Sweden.

### References

1. Bergman U, Wiholm BE. Drug-related problems causing admission to a medical clinic. *Eur J Clin Pharmacol* 1981;20(3):193-200.
2. Davies EC, Green CF, Taylor S, et al. Adverse drug reactions in hospital in-patients: a prospective analysis of 3695 patient-episodes. *PLoS One* 2009;4(2):e4439. doi: 10.1371/journal.pone.0004439
3. Molstad S, Erntell M, Hanberger H, et al. Sustained reduction of antibiotic use and low bacterial resistance: 10-year follow-up of the Swedish Strama programme. *Lancet Infect Dis* 2008;8(2):125-32. doi: 10.1016/S1473-3099(08)70017-3
4. WHO. The rational use of drugs - report of the conference of experts Nairobi, 25-29 November 1985. <http://apps.who.int/medicinedocs/documents/s17054e/s17054e.pdf>. Geneva, Switzerland: World Health Organization, 1987.
5. McGinn D, Godman B, Lonsdale J, et al. Initiatives to enhance the quality and efficiency of statin and PPI prescribing in the UK: impact and implications. *Expert Rev Pharmacoecon Outcomes Res* 2010;10(1):73-85. doi: 10.1586/erp.09.73
6. Norman C, Zarrinkoub R, Hasselstrom J, et al. Potential savings without compromising the quality of care. *Int J Clin Pract* 2009;63(9):1320-6. doi: 10.1111/j.1742-1241.2009.02129.x
7. Fijn R, Brouwers JR, Knaap RJ, et al. Drug and Therapeutics (D & T) committees in Dutch hospitals: a nation-wide survey of structure, activities, and drug selection procedures. *Br J Clin Pharmacol* 1999;48(2):239-46.
8. Sjöqvist F, Bergman U, Dahl M, et al. Drug and therapeutics committees: a Swedish experience. *WHO Drug Information* 2002;16(3)
9. Birkett D, Brose K, Cascorbi I, et al. Clinical pharmacology in research, teaching and health care: Considerations by IUPHAR, the International Union of Basic and Clinical Pharmacology. *Basic Clin Pharmacol Toxicol* 2010;107(1):531-59. doi: 10.1111/j.1742-7843.2010.00602.x
10. WHO. The Selection of Essential Drugs: Report of a WHO Expert Committee. Technical Report Series no 615. Geneva, Switzerland: World Health Organization, 1977.
11. Schiff GD, Galanter WL, Duhig J, et al. A prescription for improving drug formulary decision making. *PLoS Med* 2012;9(5):1-7. doi: 10.1371/journal.pmed.1001220
12. Grol R, Grimshaw J. From best evidence to best practice: effective implementation of change in patients' care. *Lancet* 2003;362(9391):1225-30.
13. Grol R. Successes and failures in the implementation of evidence-based guidelines for clinical practice. *Med Care* 2001;39(8 Suppl 2):II46-54.
14. Godman B, Wettermark B, Hoffmann M, et al. Multifaceted national and regional drug reforms and initiatives in ambulatory care in Sweden: global relevance. *Expert Rev Pharmacoecon Outcomes Res* 2009;9(1):65-83. doi: 10.1586/14737167.9.1.65
15. Gustafsson LL, Wettermark B, Godman B, et al. The 'wise list'- a comprehensive concept to select, communicate and achieve adherence to recommendations of essential drugs in ambulatory care in Stockholm. *Basic Clin Pharmacol Toxicol* 2011;108(4):224-33. doi: 10.1111/j.1742-7843.2011.00682.x

16. Grimshaw JM, Thomas RE, MacLennan G, et al. Effectiveness and efficiency of guideline dissemination and implementation strategies. *Health Technol Assess* 2004;8(6):iii-iv, 1-72.
17. Grol R, Dalhuijsen J, Thomas S, et al. Attributes of clinical guidelines that influence use of guidelines in general practice: observational study. *BMJ* 1998;317(7162):858-61.
18. Bjorkhem-Bergman L, Andersen-Karlsson E, Laing R, et al. Interface management of pharmacotherapy. Joint hospital and primary care drug recommendations. *Eur J Clin Pharmacol* 2013;69 Suppl 1:73-8. doi: 10.1007/s00228-013-1497-5
19. Wettermark B, Haglund K, Gustafsson LL, et al. A study of adherence to drug recommendations by providing feedback of outpatient prescribing patterns to hospital specialists. *Pharmacoepidemiol Drug Saf* 2005;14(8):579-88. doi: 10.1002/pds.1098
20. The Stockholm Drug and Therapeutics Committee. The Wise List 2015 in English. <http://www.janusinfo.se/In-English/The-Wise-List-2015-in-English/>. Stockholm, Sweden: Stockholm Healthcare Region, 2015.
21. Kumar Kakkar A, Dahiya N. The evolving drug development landscape: from blockbusters to niche busters in the orphan drug space. *Drug Dev Res* 2014;75(4):231-4. doi: 10.1002/ddr.21176
22. Yeh JS, Franklin JM, Avorn J, et al. Association of Industry Payments to Physicians With the Prescribing of Brand-name Statins in Massachusetts. *JAMA Intern Med* 2016;176(6):763-8. doi: 10.1001/jamainternmed.2016.1709
23. Lieb K, Scheurich A. Contact between doctors and the pharmaceutical industry, their perceptions, and the effects on prescribing habits. *PLoS One* 2014;9(10):e110130. doi: 10.1371/journal.pone.0110130
24. Abbasi K, Smith R. No more free lunches. *BMJ* 2003;326(7400):1155-6. doi: 10.1136/bmj.326.7400.1155
25. Stockholm County Council DTC. Jävspolicy för läkemedelskommittéorganisationen i Stockholms läns landsting (SLL) 2011 [Available from: [http://www.janusinfo.se/Global/SLK/javspolicy\\_slk\\_2011\\_2.pdf2016](http://www.janusinfo.se/Global/SLK/javspolicy_slk_2011_2.pdf2016).
26. WHO. WHO Model List of Essential Medicines - 19th List. In: <http://www.who.int/medicines/publications/essentialmedicines/en/>, ed. Geneva, Switzerland: World Health Organization, 2015.
27. Anell A. The public-private pendulum--patient choice and equity in Sweden. *N Engl J Med* 2015;372(1):1-4. doi: 10.1056/NEJMp1411430
28. WHO. WHO Collaborating Centre for Drug Statistics Methodology, Guidelines for ATC classification and DDD assignment, 2015. Oslo: World Health Organization, 2014.
29. Wettermark B, Hammar N, Fored CM, et al. The new Swedish Prescribed Drug Register--opportunities for pharmacoepidemiological research and experience from the first six months. *Pharmacoepidemiol Drug Saf* 2007;16(7):726-35. doi: 10.1002/pds.1294
30. Vlahovic-Palcevski V, Gantumur M, Radosevic N, et al. Coping with changes in the Defined Daily Dose in a longitudinal drug consumption database. *Pharm World Sci* 2010;32(2):125-9. doi: 10.1007/s11096-010-9366-0
31. Andersson K, Bergstrom G, Petzold MG, et al. Impact of a generic substitution reform on patients' and society's expenditure for pharmaceuticals. *Health Policy* 2007;81(2-3):376-84. doi: 10.1016/j.healthpol.2006.07.005
32. Godman B, Shrank W, Andersen M, et al. Comparing policies to enhance prescribing efficiency in Europe through increasing generic utilization: changes seen and global implications. *Expert Rev Pharmacoecon Outcomes Res* 2010;10(6):707-22. doi: 10.1586/erp.10.72
33. Godman B, Malmstrom RE, Diogene E, et al. Are new models needed to optimize the utilization of new medicines to sustain healthcare systems? *Expert Rev Clin Pharmacol* 2015;8(1):77-94. doi: 10.1586/17512433.2015.990380
34. Bergman U, Popa C, Tomson Y, et al. Drug utilization 90%--a simple method for assessing the quality of drug prescribing. *Eur J Clin Pharmacol* 1998;54(2):113-8.

- 1  
2  
3 35. Wettermark B, Pehrsson A, Juhasz-Haverinen M, et al. Financial incentives linked to self-  
4 assessment of prescribing patterns: a new approach for quality improvement of drug  
5 prescribing in primary care. *Qual Prim Care* 2009;17(3):179-89.  
6 36. Hjemdahl P, Allhammar A, Heaton C, et al. [SBU should investigate what is an evidence-based and  
7 cost-effective use of statins]. *Lakartidningen* 2009;106(32-33):1992-4.  
8 37. Gellad WF, Choi P, Mizah M, et al. Assessing the chiral switch: approval and use of single-  
9 enantiomer drugs, 2001 to 2011. *Am J Manag Care* 2014;20(3):e90-7.  
10 38. Fosbol EL, Folke F, Jacobsen S, et al. Cause-specific cardiovascular risk associated with  
11 nonsteroidal antiinflammatory drugs among healthy individuals. *Circ Cardiovasc Qual*  
12 *Outcomes* 2010;3(4):395-405. doi: 10.1161/CIRCOUTCOMES.109.861104  
13 39. Swedish Medical Products Agency. National Substance Register for Medicinal Products (NSL) 2016  
14 [Available from: [http://nsl.mpa.se/index\\_english.htm2016](http://nsl.mpa.se/index_english.htm2016).  
15  
16 40. Stammen LA, Stalmeijer RE, Paternotte E, et al. Training Physicians to Provide High-Value, Cost-  
17 Conscious Care: A Systematic Review. *JAMA* 2015;314(22):2384-400. doi:  
18 10.1001/jama.2015.16353  
19 41. Dreischulte T, Donnan P, Grant A, et al. Safer Prescribing--A Trial of Education, Informatics, and  
20 Financial Incentives. *N Engl J Med* 2016;374(11):1053-64. doi: 10.1056/NEJMsa1508955  
21 42. Oxman AD, Thomson MA, Davis DA, et al. No magic bullets: a systematic review of 102 trials of  
22 interventions to improve professional practice. *CMAJ* 1995;153(10):1423-31.  
23 43. Wolfe S. Rosuvastatin: winner in the statin wars, patients' health notwithstanding. *BMJ*  
24 2015;350:h1388. doi: 10.1136/bmj.h1388  
25 44. Lapointe-Shaw L, Fischer HD, Newman A, et al. Potential savings of harmonising hospital and  
26 community formularies for chronic disease medications initiated in hospital. *PLoS One*  
27 2012;7(6):e39737. doi: 10.1371/journal.pone.0039737  
28 45. Donohue JM, Morden NE, Gellad WF, et al. Sources of regional variation in Medicare Part D drug  
29 spending. *N Engl J Med* 2012;366(6):530-8. doi: 10.1056/NEJMsa1104816  
30 46. Wettermark B, Persson ME, Wilking N, et al. Forecasting drug utilization and expenditure in a  
31 metropolitan health region. *BMC Health Serv Res* 2010;10:128. doi: 10.1186/1472-6963-10-  
32 128  
33 47. Wirtz VJ, Hogerzeil HV, Gray AL, et al. Essential medicines for universal health coverage. *Lancet*  
34 2016 doi: 10.1016/S0140-6736(16)31599-9  
35 48. Komen J, Forslund T, Hjemdahl P, et al. Effects of policy interventions on the introduction of  
36 novel oral anticoagulants in Stockholm: an interrupted time series analysis. *Br J Clin*  
37 *Pharmacol* 2016 doi: 10.1111/bcp.13150  
38  
39  
40  
41  
42  
43  
44  
45  
46  
47  
48  
49  
50  
51  
52  
53  
54  
55  
56  
57  
58  
59  
60



**Table 1.** Some examples of the 55 individual Wise pieces of advice included in the Wise List. Categories: (i) choice of medicine – i.e. preferred choice of substance within a group of medicines used for a specific diagnosis, (ii) overtreatment – i.e. avoid using medicines unnecessarily, (iii) under treatment – i.e. reminders to look for and treat conditions that are often inadequately diagnosed and/or treated, or (iv) any other type of general advice related to drug therapy.

| Example of advice                                                                                                                                                          | Category of advice |
|----------------------------------------------------------------------------------------------------------------------------------------------------------------------------|--------------------|
| Use naproxen as first choice when prescribing cox-inhibitors                                                                                                               | Choice of medicine |
| Choose simvastatin for prevention of cardiovascular disease in high-risk patients with normal to medium increased levels of cholesterol.                                   | Choice of medicine |
| Do not use quinolones for treatment of uncomplicated Urinary Tract Infection (UTI) in women                                                                                | Choice of medicine |
| Always give the patient an updated medication list.                                                                                                                        | General advice     |
| Estimate and consider renal function in the selection and dosing of medicines.                                                                                             | General advice     |
| Verify the diagnosis before treating according to the “heart failure treatment ladder” and seek to establish good heart rate control (below 70 beats/min in sinus rhythm). | General advice     |
| Do not treat uncomplicated acute bronchitis with antibiotics.                                                                                                              | Over treatment     |
| Do not treat asymptomatic bacteriuria in the elderly and only culture from urine if the patient is experiencing urinary tract symptoms.                                    | Over treatment     |
| Treatment with proton pump inhibitors is not advisable in the case of stomach pain of unknown cause.                                                                       | Over treatment     |
| Improve antihypertensive treatment: determine a target blood pressure together with the patient, combine medicines more often and follow up.                               | Under treatment    |
| Treat depression to complete remission.                                                                                                                                    | Under treatment    |
| Increase the use of medicines to prevent relapse in alcohol dependence and follow up treatment outcome.                                                                    | Under treatment    |

1  
2  
3  
4  
5  
6  
7  
8  
9  
10  
11  
12  
13  
14  
15  
16  
17  
18  
19  
20  
21  
22  
23  
24  
25  
26  
27  
28  
29  
30  
31  
32  
33  
34  
35  
36  
37  
38  
39  
40  
41  
42  
43  
44  
45  
46  
47  
48  
49  
50  
51  
52  
53  
54  
55  
56  
57  
58  
59  
60

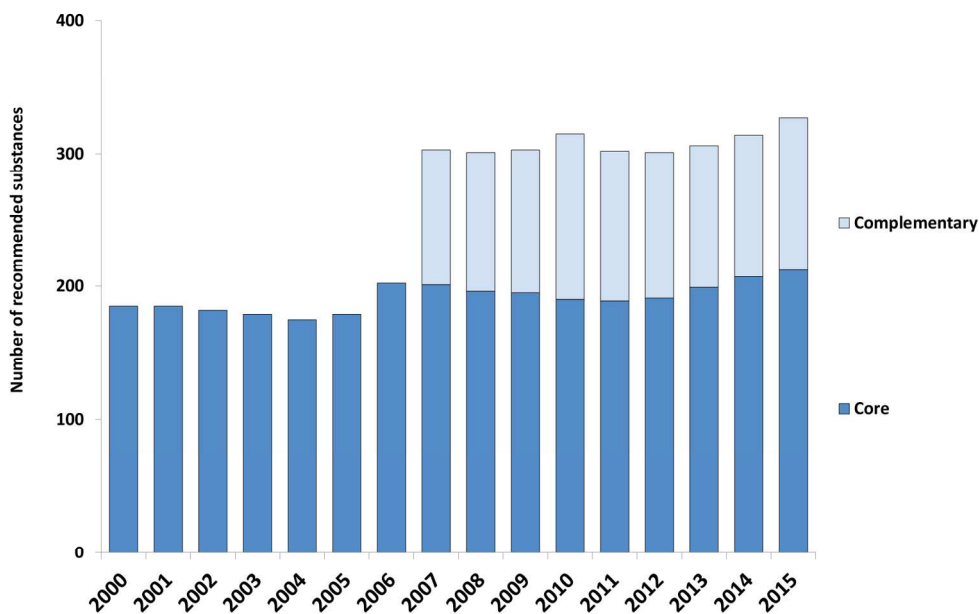

Figure 1. Number of substances included in the Wise List over time. Core medicines = Essential medicines for common illnesses, used both in primary and hospital care. Complementary medicines = Additional essential medicines to be used primarily for specialised care.<sup>26</sup>

164x108mm (300 x 300 DPI)

Review only

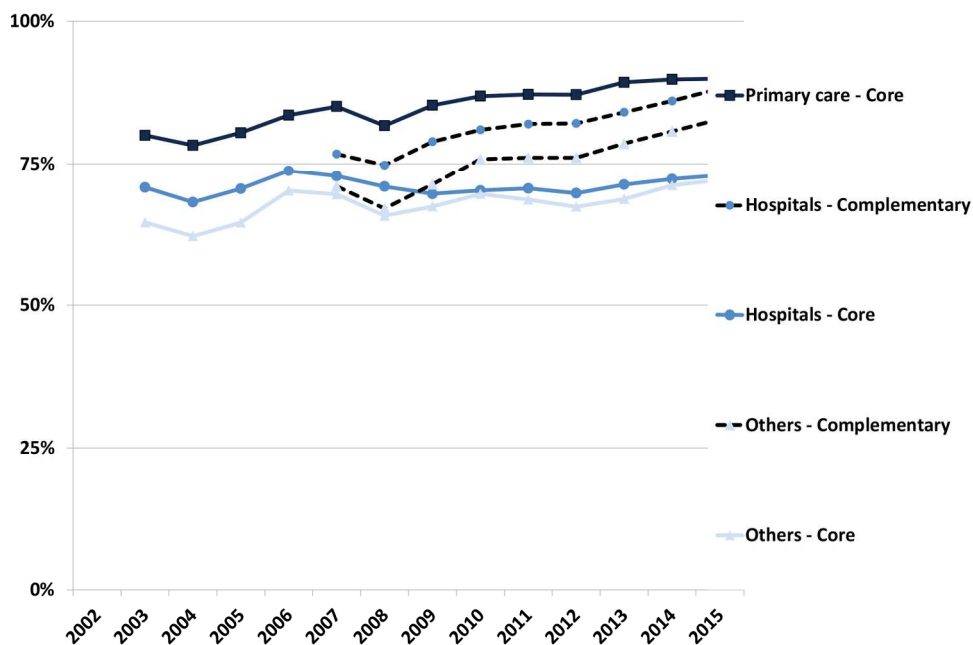

Figure 2. Adherence to recommendations (DU90%) in the Wise List for different prescriber categories in Stockholm Healthcare Region between 2001 and 2015. Data on complementary medicines available only from 2007. "Others" includes psychiatry, geriatrics, rehabilitation, school health, occupational health and private practitioners in various specialties.

166x119mm (300 x 300 DPI)

For peer review only

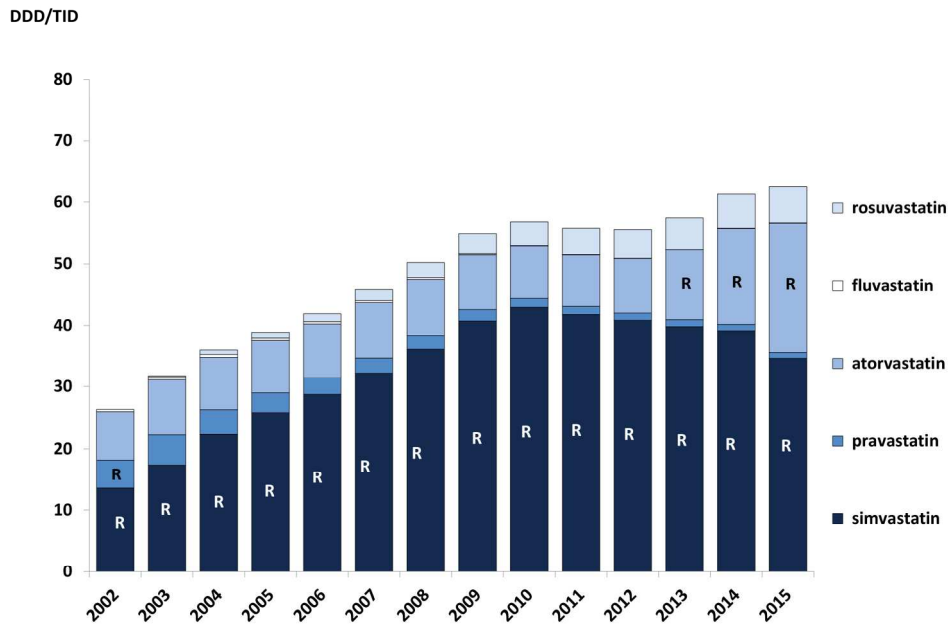

Figure 3. Prescribing patterns for statins in Stockholm Healthcare Region between 2002 and 2015 showing all statin prescriptions dispensed to the inhabitants in the region each year. The letter "R" signifies that the drug was a core recommendation in the Wise List that year. DDD/TID = Defined Daily Dose/1000 inhabitants per day.

172x112mm (300 x 300 DPI)

View only

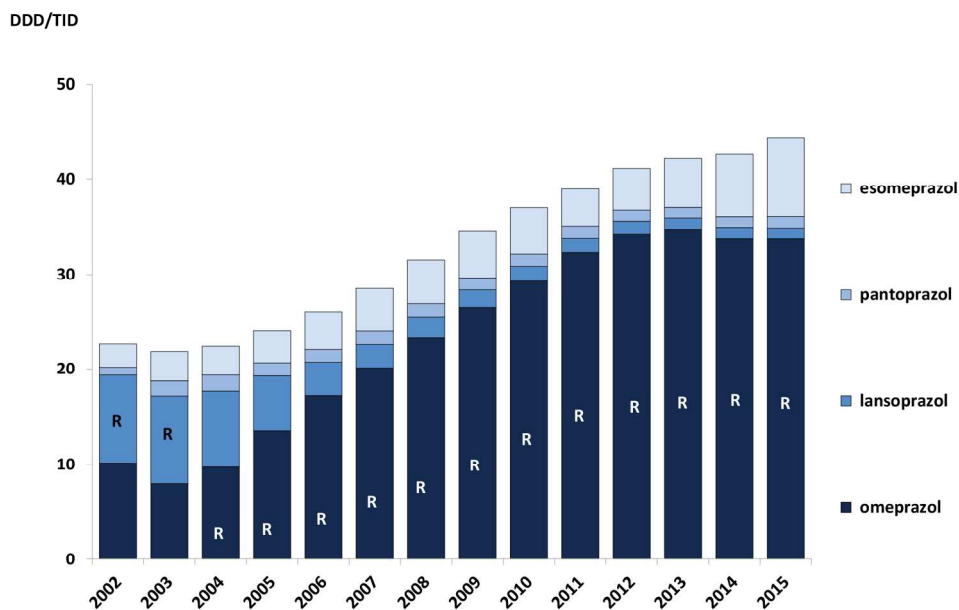

Figure 4. Prescribing pattern for proton pump inhibitors (PPI) in Stockholm Healthcare Region between 2002 and 2015 showing all PPI prescriptions dispensed to the inhabitants in the region each year. The letter "R" signifies that the drug was a core recommendation in the Wise List that year. DDD/TID = Defined Daily Dose/1000 inhabitants per day.

164x106mm (300 x 300 DPI)

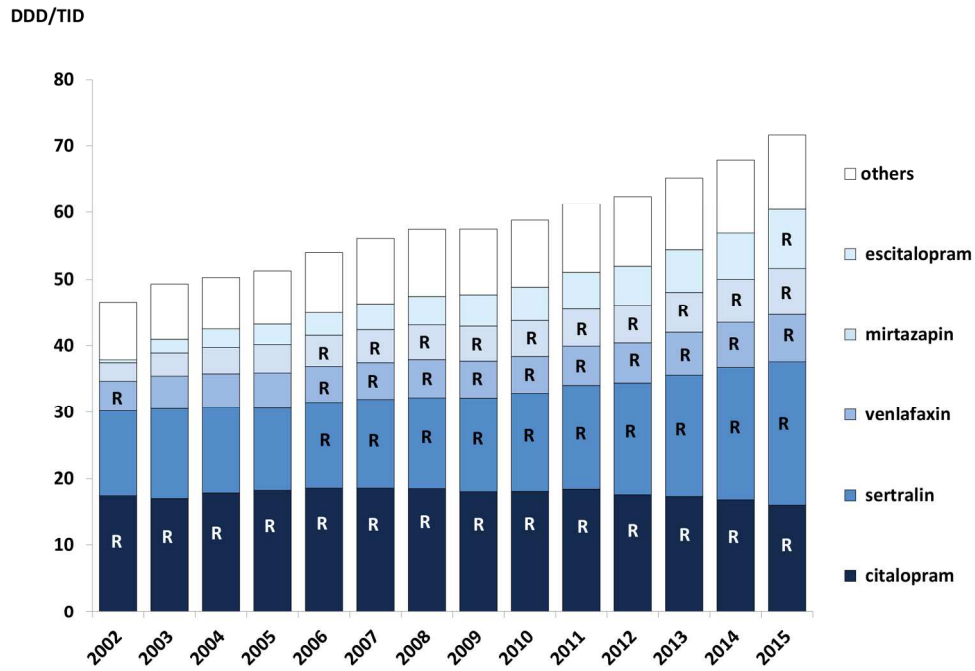

Figure 5. Prescribing pattern for SSRIs and SNRIs in Stockholm Healthcare Region between 2002 and 2015 showing all SSRI and SNRI prescriptions dispensed to the inhabitants in the region each year. The letter "R" signifies that the drug was a core recommendation in the Wise List that year. ("Others" includes duloxetine, fluoxetine, paroxetine). DDD/TID = Defined Daily Dose/1000 inhabitants per day.

167x118mm (300 x 300 DPI)

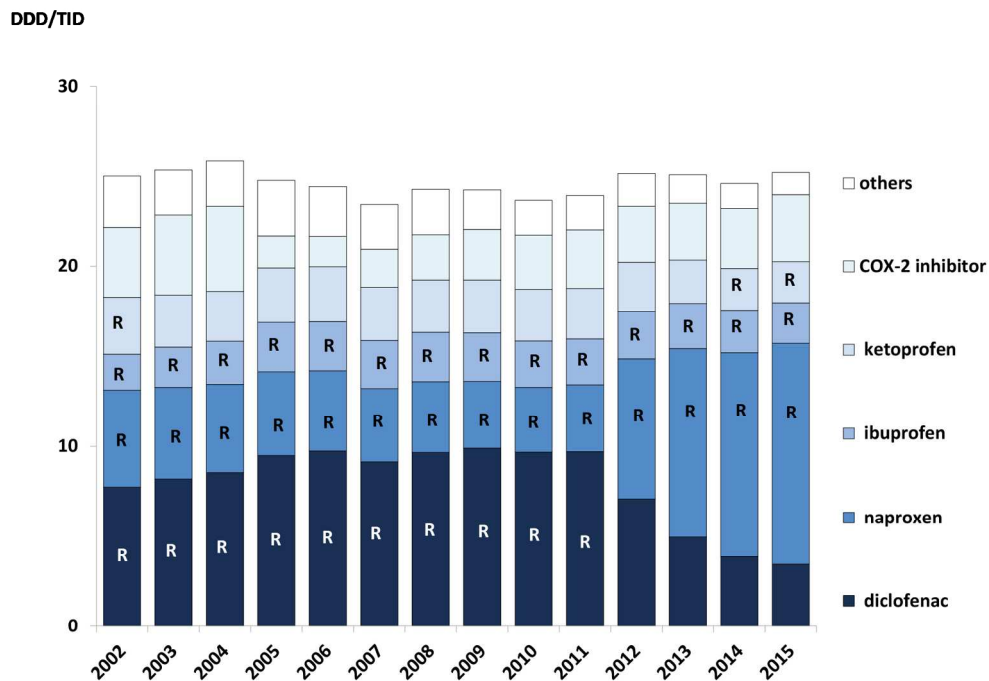

Figure 6. Prescribing pattern for COX-inhibitors in Stockholm Healthcare Region between 2002 and 2015 showing all COX-inhibitor prescriptions dispensed to the inhabitants in the region each year. The letter "R" signifies that the drug was a core recommendation in the Wise List that year. ("Others" includes aceclofenac, dexibuprofen, phenylbutazone, indomethacin, ketorolac, lornoxicam, meloxicam, nabumetone, piroxicam, sulindac, tenoxicam). DDD/TID = Defined Daily Dose/1000 inhabitants per day.

166x121mm (300 x 300 DPI)

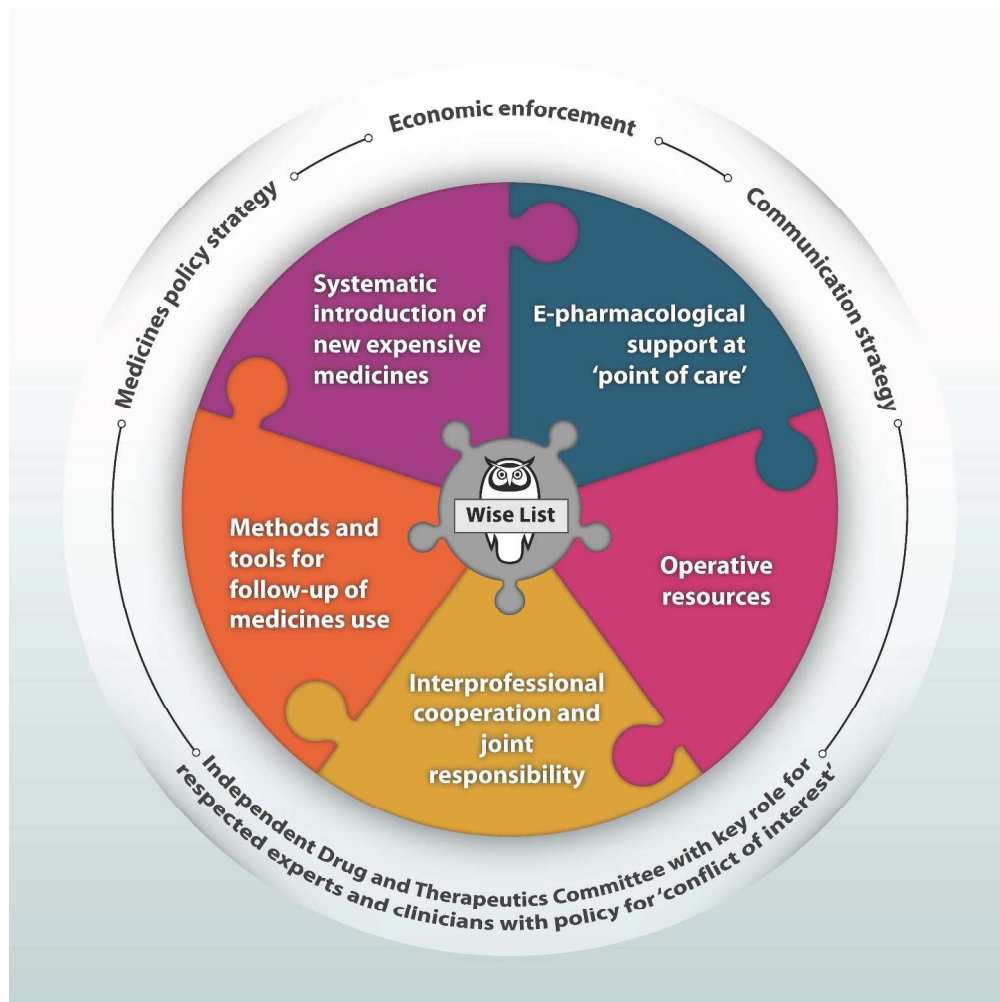

Box 2: The Stockholm model for wise use of medicines

The core part of the model is The Wise List (central part of figure). The outer circle represents the Key Strategies and the Organisational Unit, which are a pre-requisite for the collaborative work for a rational use of medicines. Since 1996 a new Swedish law stipulated that each healthcare region should have at least one Drug and Therapeutics Committee (DTC). This has provided mandate and organisational stability to issued recommendations by DTCs.<sup>8</sup> The jigsaw puzzle shows key elements necessary for producing the Wise List and implementing its guidelines in medical practice in the Stockholm Healthcare region. Operative resources include an annual budget for staff, continuous medical education of our 200 experts, infrastructure, printing, distribution and marketing of the Wise List.

552x552mm (150 x 150 DPI)



## SQUIRE 2.0 Checklist

| Title and Abstract            |                                                                                                                                                                                                                                                                                                               | Comment                                                                                                                                                                                       |
|-------------------------------|---------------------------------------------------------------------------------------------------------------------------------------------------------------------------------------------------------------------------------------------------------------------------------------------------------------|-----------------------------------------------------------------------------------------------------------------------------------------------------------------------------------------------|
| 1. Title                      | Indicate that the manuscript concerns an <b>initiative</b> to improve healthcare (broadly defined to include the quality, safety, effectiveness, patient-centeredness, timeliness, cost, efficiency, and equity of healthcare)                                                                                | Yes, included: <i>High adherence to the "Wise List" treatment recommendations in Stockholm: a 15-year retrospective review of a multifaceted approach promoting rational use of medicines</i> |
| 2. Abstract                   | a. Provide adequate information to aid in searching and indexing<br>b. Summarize all key information from various sections of the text using the abstract format of the intended publication or a structured summary such as: background, local <b>problem</b> , methods, interventions, results, conclusions | a. included<br>b. Yes, all points included except background and local problem (as the abstract has been formatted according to BMJOpen guidelines).                                          |
| Introduction                  | Why did you start?                                                                                                                                                                                                                                                                                            |                                                                                                                                                                                               |
| 3. <b>Problem Description</b> | Nature and significance of the local <b>problem</b>                                                                                                                                                                                                                                                           | In the background, second paragraph, the problem and its significance in the Stockholm Healthcare Region is described.                                                                        |
| 4. Available knowledge        | Summary of what is currently known about the <b>problem</b> , including relevant previous studies                                                                                                                                                                                                             | Described in first and second paragraphs in the background section.                                                                                                                           |
| 5. Rationale                  | Informal or formal frameworks, models, concepts, and/or <b>theories</b> used to explain the <b>problem</b> , any reasons or <b>assumptions</b> that                                                                                                                                                           | Described in the second paragraph of the background                                                                                                                                           |

1  
2  
3  
4  
5  
6  
7  
8  
9  
10  
11  
12  
13  
14  
15  
16  
17  
18  
19  
20  
21  
22  
23  
24  
25  
26  
27  
28  
29  
30  
31  
32  
33  
34  
35  
36  
37  
38  
39  
40  
41  
42  
43  
44  
45  
46  
47  
48  
49

|                                 |                                                                                                                                                                                                        |                                                                                                                                       |
|---------------------------------|--------------------------------------------------------------------------------------------------------------------------------------------------------------------------------------------------------|---------------------------------------------------------------------------------------------------------------------------------------|
|                                 | were used to develop the <b>intervention(s)</b> , and reasons why the <b>intervention(s)</b> was expected to work                                                                                      |                                                                                                                                       |
| 6. Specific aims                | Purpose of the project and of this report                                                                                                                                                              | Stated in the last sentence of the background.                                                                                        |
| Methods                         | What did you do?                                                                                                                                                                                       |                                                                                                                                       |
| 7. Context                      | Contextual elements considered important at the outset of introducing the <b>intervention(s)</b>                                                                                                       | Explained under “study area” (first section of “material and methods”)                                                                |
| 8. Intervention(s)              | a. Description of the <b>intervention(s)</b> in sufficient detail that others could reproduce it<br>b. Specifics of the team involved in the work                                                      | Explained in “box 1” and “box 2”                                                                                                      |
| 9. Study of the Intervention(s) | a. Approach chosen for assessing the impact of the <b>intervention(s)</b><br>b. Approach used to establish whether the observed outcomes were due to the <b>intervention(s)</b>                        | a. Explained under “data analysis”: three sections explaining each of the three approaches.<br>b. Described in “statistical analysis” |
| 10. Measures                    | a. Measures chosen for studying <b>processes</b> and outcomes of the <b>intervention(s)</b> , including rationale for choosing them, their operational definitions, and their validity and reliability | a. Described under “data sources”                                                                                                     |

|                            |                                                                                                                                                                                                                                                                                                                          |                                                                                                                                                                                                                                  |
|----------------------------|--------------------------------------------------------------------------------------------------------------------------------------------------------------------------------------------------------------------------------------------------------------------------------------------------------------------------|----------------------------------------------------------------------------------------------------------------------------------------------------------------------------------------------------------------------------------|
|                            | <p>b. Description of the approach to the ongoing assessment of contextual elements that contributed to the success, failure, efficiency, and cost</p> <p>c. Methods employed for assessing completeness and accuracy of data</p>                                                                                         | <p>b. Described in the three subsections of “data analysis”</p> <p>c. N/A</p>                                                                                                                                                    |
| 11. Analysis               | <p>a. Qualitative and quantitative methods used to draw <b>inferences</b> from the data</p> <p>b. Methods for understanding variation within the data, including the effects of time as a variable</p>                                                                                                                   | <p>a. Described under “statistical analysis”</p>                                                                                                                                                                                 |
| 12. Ethical Considerations | <p><b>Ethical aspects</b> of implementing and studying the <b>intervention(s)</b> and how they were addressed, including, but not limited to, formal ethics review and potential conflict(s) of interest</p>                                                                                                             | <p>“Described in the section “ethical considerations”</p>                                                                                                                                                                        |
| Results                    | <p>What did you find?</p>                                                                                                                                                                                                                                                                                                |                                                                                                                                                                                                                                  |
| 13. Results                | <p>a. Initial steps of the <b>intervention(s)</b> and their evolution over time (e.g., time-line diagram, flow chart, or table), including modifications made to the intervention during the project</p> <p>b. Details of the <b>process</b> measures and outcome</p> <p>c. Contextual elements that interacted with</p> | <p>a. All results presented as change over time, e.g. all figures</p> <p>b. N/A</p> <p>c. Described where relevant, e.g. under subheading “adherence to specific pharmacotherapeutic areas...” for statins: page 10, line 7.</p> |

1  
2  
3  
4  
5  
6  
7  
8  
9  
10  
11  
12  
13  
14  
15  
16  
17  
18  
19  
20  
21  
22  
23  
24  
25  
26  
27  
28  
29  
30  
31  
32  
33  
34  
35  
36  
37  
38  
39  
40  
41  
42  
43  
44  
45  
46  
47  
48  
49

|                    |                                                                                                                                                                                                                                                                                                                                                                                                        |                                                                                                                                                 |
|--------------------|--------------------------------------------------------------------------------------------------------------------------------------------------------------------------------------------------------------------------------------------------------------------------------------------------------------------------------------------------------------------------------------------------------|-------------------------------------------------------------------------------------------------------------------------------------------------|
|                    | <p>the <a href="#">intervention(s)</a></p> <p>d. Observed associations between outcomes, interventions, and relevant contextual elements</p> <p>e. Unintended consequences such as unexpected benefits, problems, failures, or costs associated with the <a href="#">intervention(s)</a>.</p> <p>f. Details about missing data</p>                                                                     | <p>d. Described for each of the therapeutic areas on page 10</p> <p>e. Described for each of the therapeutic areas on page 10</p> <p>f. N/A</p> |
| Discussion         | What does it mean?                                                                                                                                                                                                                                                                                                                                                                                     |                                                                                                                                                 |
| 14. Summary        | <p>a. Key findings, including relevance to the <a href="#">rationale</a> and specific aims</p> <p>b. Particular strengths of the project</p>                                                                                                                                                                                                                                                           | <p>a. First paragraph of discussion</p> <p>b. Described on page 12, second paragraph</p>                                                        |
| 15. Interpretation | <p>a. Nature of the association between the intervention(s) and the outcomes</p> <p>b. Comparison of results with findings from other publications</p> <p>c. Impact of the project on people and systems</p> <p>d. Reasons for any differences between observed and anticipated outcomes, including the influence of context</p> <p>e. Costs and strategic trade-offs, including opportunity costs</p> | Described in second and third paragraphs of the discussion.                                                                                     |
|                    |                                                                                                                                                                                                                                                                                                                                                                                                        |                                                                                                                                                 |

|                   |                                                                                                                                                                                                                                                            |                                                   |
|-------------------|------------------------------------------------------------------------------------------------------------------------------------------------------------------------------------------------------------------------------------------------------------|---------------------------------------------------|
| 16. Limitations   | a. Limits to the generalizability of the work<br>b. Factors that might have limited internal validity such as confounding, bias, or imprecision in the design, methods, measurement, or analysis<br>c. Efforts made to minimize and adjust for limitations | Described in second paragraph page 12             |
| 17. Conclusions   | a. Usefulness of the work<br>b. Sustainability<br>c. Potential for spread to other contexts<br>d. Implications for practice and for further study in the field<br>e. Suggested next steps                                                                  | Described in the last paragraph of the discussion |
| Other information |                                                                                                                                                                                                                                                            |                                                   |
| 18. Funding       | Sources of funding that supported this work. Role, if any, of the funding organization in the design, implementation, interpretation, and reporting                                                                                                        | Described in competing interest statement         |

# BMJ Open

## High adherence to the "Wise List" treatment recommendations in Stockholm: a 15-year retrospective review of a multifaceted approach promoting rational use of medicines



|                                 |                                                                                                                                                                                                                                                                                                                                                                                                                                                                                                                                                                                                                                                                                                                                                                                                                                                                                                                                                                                                                                                                                                                                                                                                                                                                                                                                                                                                                        |
|---------------------------------|------------------------------------------------------------------------------------------------------------------------------------------------------------------------------------------------------------------------------------------------------------------------------------------------------------------------------------------------------------------------------------------------------------------------------------------------------------------------------------------------------------------------------------------------------------------------------------------------------------------------------------------------------------------------------------------------------------------------------------------------------------------------------------------------------------------------------------------------------------------------------------------------------------------------------------------------------------------------------------------------------------------------------------------------------------------------------------------------------------------------------------------------------------------------------------------------------------------------------------------------------------------------------------------------------------------------------------------------------------------------------------------------------------------------|
| Journal:                        | <i>BMJ Open</i>                                                                                                                                                                                                                                                                                                                                                                                                                                                                                                                                                                                                                                                                                                                                                                                                                                                                                                                                                                                                                                                                                                                                                                                                                                                                                                                                                                                                        |
| Manuscript ID                   | bmjopen-2016-014345.R2                                                                                                                                                                                                                                                                                                                                                                                                                                                                                                                                                                                                                                                                                                                                                                                                                                                                                                                                                                                                                                                                                                                                                                                                                                                                                                                                                                                                 |
| Article Type:                   | Research                                                                                                                                                                                                                                                                                                                                                                                                                                                                                                                                                                                                                                                                                                                                                                                                                                                                                                                                                                                                                                                                                                                                                                                                                                                                                                                                                                                                               |
| Date Submitted by the Author:   | 26-Jan-2017                                                                                                                                                                                                                                                                                                                                                                                                                                                                                                                                                                                                                                                                                                                                                                                                                                                                                                                                                                                                                                                                                                                                                                                                                                                                                                                                                                                                            |
| Complete List of Authors:       | Eriksen, Jaran; Karolinska Institutet, Division of Clinical Pharmacology, Department of Laboratory Medicine; Karolinska University Hospital, Clinical Pharmacology<br>Gustafsson, Lars; Division of Clinical Pharmacology, Department of Laboratory Medicine, Karolinska Institute<br>Ateva, Kristina; Stockholm Drug and Therapeutics Committee, Public Healthcare Services Committee<br>Rahmner, Pia; Medical Management Centre, Department of Learning, Informatics, Management and Economics (LIME), Karolinska Institutet<br>Håkanson.Ovesjö, Marie-Louise; Karolinska Institutet, Division of Clinical Pharmacology, Department of Laboratory Medicine; Södersjukhuset, Department of Quality and Development<br>Jirlow, Malena; Public Healthcare Services Committee<br>Juhász-Haverinen, Maria; Public Healthcare Services Committee<br>Lärfars, Gerd; Karolinska Institutet, Department of Clinical Science and Education, Internal Medicine, Södersjukhuset<br>Malmstrom, Rickard; Karolinska Institutet, Department of Medicine Solna; Karolinska University Hospital, Department of Clinical Pharmacology<br>Wettermarik, Björn; Karolinska Institutet, Division of Clinical Pharmacology, Department of Laboratory Medicines; Stockholm Drug and Therapeutics Committee<br>Andersén Karlsson, Eva; Karolinska Institutet, Department of Clinical Science and Education, Internal Medicine, Södersjukhuset |
| <b>Primary Subject Heading</b>: | Health services research                                                                                                                                                                                                                                                                                                                                                                                                                                                                                                                                                                                                                                                                                                                                                                                                                                                                                                                                                                                                                                                                                                                                                                                                                                                                                                                                                                                               |
| Secondary Subject Heading:      | Pharmacology and therapeutics, Health policy, Health economics, Evidence based practice                                                                                                                                                                                                                                                                                                                                                                                                                                                                                                                                                                                                                                                                                                                                                                                                                                                                                                                                                                                                                                                                                                                                                                                                                                                                                                                                |
| Keywords:                       | Adherence, Drug and therapeutics committee, Essential medicines, prescribing, Rational Use of Medicines, Health systems                                                                                                                                                                                                                                                                                                                                                                                                                                                                                                                                                                                                                                                                                                                                                                                                                                                                                                                                                                                                                                                                                                                                                                                                                                                                                                |
|                                 |                                                                                                                                                                                                                                                                                                                                                                                                                                                                                                                                                                                                                                                                                                                                                                                                                                                                                                                                                                                                                                                                                                                                                                                                                                                                                                                                                                                                                        |

SCHOLARONE™  
Manuscripts

1  
2  
3  
4  
5  
6  
7  
8  
9  
10  
11  
12  
13  
14  
15  
16  
17  
18  
19  
20  
21  
22  
23  
24  
25  
26  
27  
28  
29  
30  
31  
32  
33  
34  
35  
36  
37  
38  
39  
40  
41  
42  
43  
44  
45  
46  
47  
48  
49  
50  
51  
52  
53  
54  
55  
56  
57  
58  
59  
60

For peer review only

1  
2  
3 **High adherence to the "Wise List" treatment recommendations in Stockholm: a 15-year**  
4 **retrospective review of a multifaceted approach promoting rational use of medicines**  
5  
6

7 Jaran Eriksen\*, researcher and specialty registrar, Division of Clinical Pharmacology,  
8 Department of Laboratory Medicine, Karolinska Institutet and Department of Clinical  
9 Pharmacology, Karolinska University Hospital, SE-14186 Stockholm, Sweden

10 Lars L Gustafsson, professor MD, Division of Clinical Pharmacology, Department of  
11 Laboratory Medicine, Karolinska Institutet and Department of Clinical Pharmacology,  
12 Karolinska University Hospital, SE-14186 Stockholm, Sweden

13 Kristina Ateva, pharmacist, Stockholm Drug and Therapeutics Committee, Public Healthcare  
14 Services Committee, Box 17533, SE-118 91 Stockholm

15 Pia Bastholm-Rahmner, behavioural scientist, Medical Management Centre, Department of  
16 Learning, Informatics, Management and Ethics (LIME), Karolinska Institutet, SE-171 77  
17 Stockholm

18 Marie-Louise Ovesjö, consultant clinical pharmacologist, Division of Clinical Pharmacology,  
19 Department of Laboratory Medicine, Karolinska Institutet and Department of Quality and  
20 Development, Södersjukhuset, SE-118 83 Stockholm, Sweden.

21 Malena Jirlow, communication strategist, Public Healthcare Services Committee, Box 17533,  
22 SE-118 91 Stockholm

23 Maria Juhasz-Haverinen, pharmacist, Public Healthcare Services Committee, Box 17533, SE-  
24 118 91 Stockholm

25 Gerd Lärfars, associate professor, senior consultant, Department of Clinical Science and  
26 Education, Södersjukhuset, Internal Medicine, Karolinska Institutet, SE-118 83 Stockholm,  
27 Sweden

28 Rickard E. Malmström, associate professor, senior consultant, Department of Clinical  
29 Pharmacology, Karolinska University Hospital & Department of Medicine Solna, Karolinska  
30 Institutet, SE-17176 Stockholm, Sweden

31 Björn Wettermark, pharmacist, associate professor, Division of Clinical Pharmacology,  
32 Department of Laboratory Medicine, Karolinska Institutet at Karolinska University Hospital,  
33 Stockholm and Drug and Therapeutics Committee, SE-102 39 Stockholm

34 Eva Andersén-Karlsson, associate professor, senior consultant, Department of Clinical  
35 Science and Education, Södersjukhuset, Internal Medicine, Karolinska Institutet, SE-118 83  
36 Stockholm, Sweden

37  
38  
39  
40  
41  
42  
43  
44  
45  
46  
47  
48 On behalf of the Stockholm Drug and Therapeutics Committee: Tareq Alsaody, Peter  
49 Aspelin, Peter Bárány, Harry Beitner, Johan Bratt, Torkel B Brismar, Marja-Liisa Dahl,  
50 Ulrika Dahnell, Paulina Dalemo, Christine Fransson, Stina Fransson Sellgren, Jan  
51 Hasselström, Roger Henriksson, Rose Marie Hallin, Paul Hjemdahl, Margareta Holmström,  
52 Charlotte Höybye, Thomas Kahan, Inga Klarin, Angelica Lindén Hirschberg, Synnöve  
53 Lindemalm, Mikael Lördal, Mussie Msghina, Ricard Nergårdh, Christer Norman, Åke  
54 Örtqvist, Peter Persson, Magnus Røjvall, Michael Runold, Carl-Olav Stiller, Marie Almvik  
55 (Sundström), Leif Tallstedt, Inga Tjäder, Mia von Euler, Rumiana Zlatewa.  
56  
57  
58  
59  
60



1  
2  
3  
4  
5  
6  
7  
8  
9  
10  
11  
12  
13  
14  
15  
16  
17  
18  
19  
20  
21  
22  
23  
24  
25  
26  
27  
28  
29  
30  
31  
32  
33  
34  
35  
36  
37  
38  
39  
40  
41  
42  
43  
44  
45  
46  
47  
48  
49  
50  
51  
52  
53  
54  
55  
56  
57  
58  
59  
60

\*Corresponding author: Jaran Eriksen, Division of Clinical Pharmacology, Department of Laboratory Medicine, Karolinska Institutet at Karolinska University Hospital, SE-141 86 Stockholm, Sweden. E-mail: [jaran.eriksen@ki.se](mailto:jaran.eriksen@ki.se)

**Key words:**

Adherence, drug and therapeutics committee. essential medicines, prescribing, guidelines, health systems, rational use of medicines

For peer review only

## Abstract

**Objectives:** To present the “Wise List” (a formulary of essential medicines for primary and specialised care in Stockholm Healthcare Region) and assess adherence to the recommendations over a 15-year period.

**Design:** Retrospective analysis of all prescription data in the Stockholm Healthcare Region between 2000 and 2015 in relation to the Wise List recommendations in the same time period.

**Setting:** All outpatient care in the Stockholm Healthcare Region.

**Participants:** All prescribers in the Stockholm Healthcare Region

**Main outcome measures:** The number of core and complementary substances included in the Wise List, the adherence to recommendations by Anatomic Therapeutic Chemical (ATC) 1<sup>st</sup> level using Defined Daily Doses (DDDs) adjusted to the DDD for 2015, adherence to recommendations over time measured by dispensed prescriptions yearly between 2002 and 2015.

**Results:** The number of recommended core substances was stable (175 to 212). Overall adherence to the recommendations for core medicines for all prescribers increased from 75% to 84% (2000 to 2015). The adherence to recommendations in primary care for core medicines increased from 80% to 90% (2005 to 2015) with decreasing range in practice variation (32% to 13%). Hospital prescriber adherence to core medicine recommendations was stable but increased for the combination core and complementary medicines from 77% to 88% (2007 to 2015). Adherence varied between the four therapeutic areas studied.

**Conclusions:** High and increasing adherence to the Wise List recommendations was seen for all prescriber categories. The transparent process for developing recommendations involving respected experts and clinicians using strict criteria for handling potential conflicts of interests, feedback to prescribers, continuous medical education and financial incentives are possible contributing factors. High quality evidence based recommendations to prescribers, such as the Wise List, disseminated through a multifaceted approach, will become increasingly important and should be developed further to include recommendations and introduction protocols for new expensive medicines.

**Strengths of the study:**

- The study data covers all prescriptions for the Stockholm Healthcare Region (population 2.2 million)
- The study includes all care providers in the Stockholm Healthcare Region

**Limitations of the study:**

- The study does not include a control group
- A causal relationship between the guidelines and the seemingly high adherence cannot be determined

For peer review only

## Background

Inappropriate use of medicines increases the risk of therapeutic failure, adverse events, antimicrobial resistance, and is a waste of resources.<sup>1-6</sup> This recognition was a driving force behind the establishment of Drug and Therapeutics Committees (DTC)<sup>7-9</sup> and the Essential Medicines concept<sup>10</sup> introduced by the World Health Organization (WHO) in the 1970s. DTCs select medicines based on scientific evidence and influence physician prescribing to achieve rational use of medicines (RUM).<sup>8 10 11</sup> As part of their strategies, DTCs develop treatment guidelines and formularies but changing behaviour takes time and adherence to recommendations varies among prescribers and is surprisingly poor in most cases.<sup>12 13</sup> Consequently, new models need to be developed and evaluated to provide trust and adherence to recommendations of essential medicines throughout the healthcare system.

In 1996 a new Swedish law stipulated that each healthcare region should have at least one DTC to issue guidelines/recommendations and promote RUM.<sup>8</sup> This law has been essential as a platform and base for gaining trust in and assuring resources for DTCs in Stockholm. Six years after introduction of the law medicines budgets were devolved from the national to the regional level.<sup>14</sup> These changes prompted new ways to communicate independent prescribing recommendations such as the “Wise List” concept of essential medicines for common diseases introduced in Stockholm (Box 1).<sup>15</sup> The concept was designed based on the understanding that prescribing recommendations should be issued in one version for the whole region irrespective of whether patients were treated in primary or in specialised care in public or private facilities. Furthermore, a key consideration was that the recommendations have to be based on evidence and should be issued jointly by respected experts and clinicians with an aim to enhance quality of care.<sup>8 11 15-18</sup> The Wise List concept was developed knowing that multifaceted contextualized methods are needed to implement recommendations. Such strategies may include professional ownership, continuous medical education, active dissemination, “point-of-care” access to independent information about medicines as well as feedback of prescribing patterns to physicians using modern Information Communication Technology (ICT).<sup>17 19</sup> These concepts were all applied in what was introduced as the “Stockholm Model for Wise Use of Medicines” (Box 2). The Stockholm Healthcare Region had five local DTCs with their own formularies from 1980s to 1999, but a joint formulary for the entire Stockholm Healthcare Region was first issued by the regional coordinating DTC in 2000.<sup>15</sup> The Wise List concept has since then continuously improved to reach a mature design and work process. In 2008 a minor financial incentive was introduced for primary health care centres (PHCs) meeting agreed prescribing targets and writing an annual quality report.<sup>14</sup> Since its launch the Wise List concept has been further refined to address the increasing challenge to manage the introduction of new expensive medicines as well as to reduce the negative environmental impact of medicines.<sup>20</sup>

Due to increasing costs for developing medicines, generic competition and the strained global healthcare budgets, pharmaceutical companies have changed their focus from blockbuster medicines to niched orphan drugs that have a potential to generate more revenue.<sup>21</sup> At the same time, there is growing evidence that the pharmaceutical industry influences prescriber

practices,<sup>22 23</sup> but healthcare funders and medical professionals are increasingly implementing measures to minimise negative consequences of this.<sup>24</sup> In the context of the changing medicines market the need for independent, evidence-based information for prescribers becomes increasingly important. To our knowledge there have been no scientific evaluations of health system wide interventions aiming to tackle this challenge. It is therefore important to evaluate the effects of such work done to further refine strategies for optimising use of medicines. The objective of this paper is to describe the content of the “Wise List” since its launch and to assess prescribers’ adherence to the recommendations over a 15-year period.

#### Box 1: The Wise List concept<sup>20</sup>

- The Wise List (“Kloka Listan” in Swedish) was developed for the whole Stockholm Healthcare Region in 2000 (the name “Wise List” was launched in 2001)
- Includes around 200 recommended core medicines for the treatment of common diseases in primary and hospital care
- Includes 100 complementary medicines for common diseases in specialised care (since 2007)
- Covers 24 therapeutic areas
- Is a pocket-sized booklet and also available in a web-version
- Respected experts and clinicians together with clinical pharmacologists, pharmacists and nurses agree on recommendations based on review of scientific evidence using transparent criteria, including cost-effectiveness evaluation
- Is a joint effort across disciplines and institutions and includes a policy for conflict of interest with annually renewed declarations. This policy contains rules and regulations for definitions of conflict of interest and how to handle them<sup>25</sup>
- Includes non-pharmacological advice for several therapeutic areas. For some therapeutic areas there are step-wise recommendations linked to disease severity and concomitant diseases.
- The Wise List also includes around 10 “Wise piece of advice” (short, focussed messages) selected yearly to improve certain pharmacotherapeutic practices for which there are potential for improvement in quality of medicine use, e.g. “*Do not treat uncomplicated acute bronchitis with antibiotics*”
- The Wise List is communicated through a comprehensive communication, branding and marketing strategy with experts in a key role and integrated with a program for continuous medical education<sup>15 18</sup> (Box 2)

#### Definitions used in this paper

*Core medicines* = Essential medicines for common illnesses, recommended both for primary and specialised care.

*Complementary medicines* = Additional essential medicines to be recommended primarily for specialised care.

These definitions are based on the WHO model list of essential medicines.<sup>26</sup>

## Material and methods

### *Study area*

This study was conducted in Stockholm Healthcare Region with approximately 2.2 million inhabitants served by more than 200 PHCs, seven emergency hospitals as well as geriatric clinics, psychiatric services, private specialists, nursing homes and other healthcare providers (e.g. occupational health, school health, rehabilitation). Swedish healthcare is financed through public taxation with limited patient co-payment for prescribed medicines and health care visits.<sup>27</sup>

### *Data sources*

The number of different substances recommended as core or complementary medicines was collected from a database of the contents of the “Wise List” from 2000 to 2015. Data are presented by therapeutic area ATC 1st level and year.<sup>28</sup> The year 2000 was chosen as the initial year of observation as the first joint list of recommendations for the whole region was launched that year.

We also compiled all “Wise pieces of advice” (short messages aimed at improving pharmacotherapy (Box 1, Table 1)), from each edition of the “Wise List”.

Data on dispensed prescriptions were collected from the Swedish Prescribed Drug Register. In addition to the prescriptions, the register contains patient demographics (age, sex and area of residence of the patient) as well as information about the unit where the prescription was issued.<sup>29</sup>

### *Data analysis*

#### *Number of substances and the Wise pieces of advice*

The number of substances included in the Wise List each year was calculated and presented according to their classification as core or complementary medicines.

The Wise pieces of advice were grouped within four areas, i.e.: (i) choice of medicine – i.e. preferred choice of substance within a group of medicines used for a specific disease, (ii) overtreatment – i.e. avoid using medicines unnecessarily, (iii) under treatment – i.e. reminders to test for and treat conditions that are under diagnosed and/or under treated in the Stockholm region, or (iv) any other type of general advice related to RUM.

#### *Adherence to recommendations*

Data were analysed by ATC using Defined Daily Doses (DDDs) adjusted to correspond to the DDD for the year 2015.<sup>28,30</sup> The year 2002 was chosen as baseline since a national regulation for mandatory generic substitution resulting in substantial price reductions for generics was introduced in October that year, thus changing the pharmaceutical market substantially.<sup>14,31</sup>

1  
2  
3 Separate analyses on the overall adherence were also made for each individual PHC in 2005,  
4 2010 and 2015 to assess to what extent variation between practices had changed over time.  
5

6 Data on prescriptions were analysed with respect to the overall adherence to the Wise List  
7 recommendations – both for all prescribers and by category (primary care, outpatient hospital  
8 care and others). The category others included psychiatry, geriatrics, rehabilitation, school  
9 health, occupational health and private practitioners of various specialities. Data on prescriber  
10 category of were available from 2003.  
11  
12

### 13 *Change over time in adherence to recommendations*

14 Adherence to recommendations was measured based on all dispensed prescriptions in  
15 Stockholm Healthcare Region each year between 2000 (the year the first joint list of treatment  
16 recommendations in Stockholm was launched) and 2015. Adherence to guidelines in different  
17 pharmacotherapeutic areas were studied from 2002 (when prescriber work place ID was  
18 added to the Swedish Prescribed Drug Register, and a national regulation for mandatory  
19 generic substitution was introduced in Sweden) to 2015. We studied adherence to the  
20 guidelines in the following four different pharmacotherapeutic areas: (1) proton pump  
21 inhibitors (PPIs), (2) COX-inhibitors, (3) statins and (4) selective serotonin receptor uptake  
22 inhibitors (SSRI) or serotonin-noradrenaline reuptake inhibitors (SNRI). These medicines  
23 were selected as there were specific “Wise pieces of advice” relating to these groups of  
24 medicines during the study period. The Wise pieces of advice concerning these  
25 pharmacotherapeutic areas were warranted either because of safety concerns or because there  
26 was a need to counteract commercial pressure on physicians to prescribe new, less cost-  
27 effective treatments.<sup>32 33</sup>  
28  
29  
30  
31  
32  
33  
34

### 35 **Statistical analyses**

36 Descriptive statistics were used including numbers and proportions expressed in percentages  
37 for different groups. The adherence to the Wise List was measured using the Drug Utilization  
38 90% (DU 90%) method.<sup>34</sup> This method is recommended by the WHO for drug utilization  
39 studies and defines the number of different substances (ATC 5th level) constituting 90% of  
40 the volume expressed in DDDs and the adherence to recommendations within this segment.<sup>34</sup>  
41 Note that the calculated adherence rate is not linked to data on diagnosis of the patient, but  
42 shows the amount of the substances prescribed for each specific ATC group of substances on  
43 the Wise List. E.g. for ATC A02BC (PPI), if a substance recommended on the Wise List is  
44 prescribed it is considered adherent to the Wise List recommendation. This method is  
45 routinely used in the Stockholm region to monitor the adherence to the Wise List  
46 recommendations as well as to provide feedback to prescribers forming the basis for local  
47 quality assessment and continuous medical education.<sup>19 35</sup>  
48  
49  
50  
51  
52

53 Variation in adherence rates between practices was calculated using the extremal quotient  
54 (ratio of maximum to minimum value).  
55  
56  
57  
58  
59  
60



1  
2  
3 All data were analysed using the statistical package SAS version 9.4 (SAS Institute, Cary,  
4 NC) and Microsoft Excel 2010.  
5  
6

### 7 **Ethical considerations**

8 This work was based on routinely available aggregate prescribing information from databases  
9 used for monitoring healthcare with no possibility to identify individual patients or  
10 prescribers. The analyses were part of ongoing quality improvement work at Stockholm  
11 Healthcare Region. All data analyses complied with Swedish Personal Data Act and no  
12 application for approval by the Regional Institutional Review Board was therefore needed.  
13  
14

### 15 **Results**

#### 16 *Number of substances included as recommendations in the Wise List over time*

17 The number of recommended core medicines in the Wise List was relatively stable over the  
18 years, fluctuating between 175 and 212 substances. Complementary medicines were included  
19 in the Wise List from 2007 and have remained at around 100 substances since then (fig. 1).  
20  
21  
22

#### 23 *Categories of Wise pieces of advice*

24 The concept of Wise pieces of advice was introduced in 2003. There have been around 10  
25 individual pieces of advice every year, comprising in total 55 unique messages. Some advice  
26 were only included in the list for one year, whereas 20 of the advice have been included for 3  
27 years or more. Most advice (n=19) addressed choice of medicine within a class, the remaining  
28 concerned general advice (n=14), over treatment (n=12) or under treatment (n=10). The  
29 pharmacotherapeutic areas with the highest number of Wise pieces of advice were  
30 cardiovascular diseases (n=9), infectious diseases (n=8), general/geriatric (n=7), psychiatry  
31 and pain treatment (both n=7). Examples of advice are listed in table 1.  
32  
33  
34  
35  
36

#### 37 *Overall adherence to the Wise List*

38 The overall adherence to the Wise List recommendations for core medicines for all  
39 prescribers (primary and specialised care) in the region increased steadily from 75% in 2000  
40 to 84% in 2015. The adherence rates differed between prescriber categories, but increased for  
41 all of them.  
42  
43

44 The adherence to recommendations in primary care for core medicines increased from 80% in  
45 2005 to 90% in 2015 (fig 2) and showed a decreasing range in variation between practices  
46 over time from 32% (57% to 89%) in 2005, 26% (69% to 95%) in 2010 to 13% (84% to 97%)  
47 in 2015. The extremal quotient showed a significant reduction from 1.6 in 2005, 1.4 in 2010  
48 to 1.3 in 2015.  
49  
50

51  
52 For prescribers at hospitals the adherence to core medicine recommendations was stable from  
53 2003 to 2015 (71% to 73%) but increased for the combination core plus complementary  
54 medicines between 2007 and 2015 from 77% to 88%. For all other prescriber categories the  
55 adherence increased over the time periods both for core (65% to 72%) and for the  
56 combination core plus complementary medicines (71% to 83%) (fig 2).  
57  
58  
59  
60



### *Adherence to specific pharmacotherapeutic areas in the Wise List*

Statins: Wise pieces of advice for statins have been included in the Wise List most years since its launch. The recommendation has been both to increase the use of statins in high-risk patients, as well as to choose simvastatin. Simvastatin had good documentation and low price due to patent expiry already in 2003 and was, before patent expiry of atorvastatin, considered more cost-effective than the other statins.<sup>36</sup> The volumes of statins increased throughout the period and simvastatin was the dominating substance. Prescribing of other statins remained at a low level but when the patent for atorvastatin expired and less expensive generics became available, the Wise List included this substance among the recommended ones (from 2013), which is also reflected in higher volumes of atorvastatin prescriptions dispensed (fig 3).

PPIs: There have been several Wise pieces of advice related to the use of PPIs in the Wise List over the study period. These have aimed to decrease unnecessary use of PPIs, as well as recommending omeprazole (and pantoprazole and lansoprazole in 2002-2003) instead of other less cost-effective PPIs. Despite this, volumes of PPIs more than doubled between 2002 and 2015 to the equivalent of 4.5% of the population constantly treated with PPIs with the vast majority of prescriptions for omeprazole (fig 4).

SSRI/SNRI: Due to strong marketing pressure from the industry to prescribe the S-enantiomer of citalopram (escitalopram),<sup>37</sup> a Wise piece of advice was introduced in 2011 recommending the prescriber to use either citalopram or sertraline for patients in need of pharmacological treatment of depression. Citalopram and sertraline dominated the treatment throughout the period, but prescriptions for all other antidepressants have also increased (fig 5).

COX-inhibitors: In 2012 the Wise List changed its recommendation from diclofenac to naproxen based on accumulated evidence indicating an increased risk for cardiovascular events in patients using diclofenac.<sup>38</sup> A rapid change in prescribing patterns was observed with a marked decrease in diclofenac prescribing with a corresponding increase for naproxen (figure 6).

## **Discussion**

This study demonstrates high adherence to the Wise List recommendations in the Stockholm Healthcare Region. The overall adherence rate increased steadily over time, but with variations between therapeutic areas. Additionally the number of recommended core substances has been kept stable (around 200 substances) for the 15 years since the introduction of the Wise List despite the number of substances with market authorisation in Sweden increasing from 1235 to 1554 in the same time period.<sup>39</sup> A limited number of recommendations is critical to make it feasible for prescribers to choose the best therapies for their patients, keeping knowledge up to date among prescribers about the clinical pharmacology and pharmacotherapeutic characteristics of each recommended medicine.<sup>8 9 15</sup>

1  
2  
3 High adherence to the Wise List recommendations was seen across all therapeutic areas both  
4 in primary and hospital care. There could be several reasons for this. We consider that the  
5 transparent development process of recommendations involving respected experts and  
6 clinicians within different therapeutic areas and strict criteria for handling potential conflicts  
7 of interests are essential for the high success rates to recommendations.<sup>15 40</sup> Financial  
8 incentives were introduced in Stockholm healthcare region in 2008<sup>14</sup> and have also been  
9 shown to contribute to the high adherence.<sup>35</sup> Originally, these incentives were introduced in  
10 primary care where PHCs received a small bonus linked to their adherence to the Wise List if  
11 the adherence was more than 80% and if they reflected on their prescribing patterns in a  
12 “quality report”.<sup>35</sup> A higher target has not been set, as complete adherence is not considered  
13 suitable. This is because the Wise List does not include all possible treatment strategies for  
14 e.g. complicated cases, patients with allergies to medicines, or cases with potential drug-drug  
15 interactions. Physicians should have the possibility of using their clinical judgment and  
16 prescribe a substance not included on the Wise List if this is better for the patients. Therefore,  
17 complete adherence is neither wanted nor aimed for. Since 2008 core Wise List medicines  
18 (about 200) are free of charge for all hospitals, whereas they have to fund 50% of the cost of  
19 all other prescribed medicines. Previously the healthcare region covered all costs for  
20 prescriptions across hospitals and healthcare institutions centrally. Sound and trusted evidence  
21 based guidelines in combination with a communication strategy consisting of a branding and  
22 marketing strategy for both prescribers and the public, integrated with a program for  
23 continuous medical education, are major factors for successful adherence to DTC  
24 recommendations. In Stockholm this communication strategy and the continuous medical  
25 education programme is an ongoing, continuously evolving important part of the Wise List  
26 strategy.<sup>18</sup> The branding and marketing strategy is based on principles of social marketing.  
27 Core values of the brand Wise List have been defined as a shortlist of the best medicines, set  
28 up by respected experts and clinicians, for the best treatment of the most common diseases.  
29 This is in contrast to the marketing material provided by pharmaceutical industry. The Wise  
30 List has been promoted to prescribers and patients by traditional marketing methods such as  
31 ads in print, direct mail marketing like postcards, brochures, letters, and fliers and at oral  
32 presentations among stakeholders. The core value of the product has been consistent over the  
33 years and so also the key message in the marketing campaigns<sup>14,15,18</sup>. Prescriber ownership of  
34 the strategy has strengthened the Wise List work in developing and adopting state-of-the-art  
35 recommendations.<sup>11-13 15 16</sup> Multifaceted interventions, academic detailing and reminders have  
36 all been found to be effective.<sup>16 41 42</sup>

37  
38  
39  
40  
41  
42  
43  
44  
45  
46  
47  
48 Our findings from the specific therapeutic areas demonstrate that the prescribers switched  
49 substances within a therapeutic area and reduced under treatment in accordance with the Wise  
50 List and Wise pieces of advice. However, the list has not been successful in reducing  
51 overtreatment. The failure in reducing PPI use is in concordance with other European  
52 countries where prescribing of PPI has also increased several-fold.<sup>32</sup> In contrast, there was a  
53 marked switch in COX-inhibitor prescriptions from diclofenac to naproxen after a change of  
54 recommendations in the 2012 Wise List edition. An important explanation for the difference  
55 in adherence between these therapeutic areas may be the fact that using omeprazole has no  
56 clear medical disadvantage. The reason for switching from diclofenac to naproxen was  
57  
58  
59  
60

1  
2  
3 accumulated evidence showing increased risk of cardiovascular disease with diclofenac,<sup>38</sup>  
4 which was clearly accepted by clinicians. Similar to the findings for COX-inhibitors the  
5 prescribers followed the recommendations for statins and SSRI/SNRI to a high degree and the  
6 prescribing of non-recommended escitalopram was low despite high marketing pressure  
7 similar to that of esomeprazole.<sup>37</sup> This marketing pressure from the pharmaceutical industry  
8 could have contributed to the failure in reducing PPI prescriptions, but despite increasing  
9 numbers of prescriptions, the vast majority remained omeprazole, as recommended by the  
10 Wise List. The adherence to the recommendation to use simvastatin instead of atorvastatin or  
11 rosuvastatin resulted in substantial economical savings for the Stockholm Health Care Region  
12 in contrast to other countries where rosuvastatin was the most prescribed statin.<sup>43</sup> To illustrate  
13 this, if just 10% of the simvastatin DDD had been replaced by rosuvastatin in 2008 this would  
14 have increased costs by 14.4 million SEK (1 SEK ~ 0.1 € in 2008). This is similar to a  
15 Canadian study of publically funded outpatient medicines where implementing harmonised  
16 prescribing recommendations could save pharmaceutical cost.<sup>44</sup> Regional differences in  
17 medicine costs within the Medicare system in the US have been shown to depend on the  
18 medicines selected for the formulary.<sup>45</sup>

19  
20  
21  
22  
23  
24  
25 Although we can relate prescribing data to the content of the Wise List and the Wise pieces of  
26 advice, without a control group we cannot know whether the seemingly high adherence is in  
27 fact due to a causal relationship between these factors. However, a major strength of the study  
28 is that we have data for a whole region, including all prescriptions from all care providers.  
29  
30

31  
32  
33  
34  
35  
36  
37  
38  
39  
40  
41  
42  
43  
44  
45  
46  
47  
48  
49  
50  
51  
52  
53  
54  
55  
56  
57  
58  
59  
60  
New niche medicines, soaring medicine costs and limited budgets pose new challenges to  
health care systems globally. Furthermore, the large number of new expensive biological  
medicines in pipeline has highlighted the importance of priority setting and development of  
methods to monitor the adherence to the recommendations,<sup>46</sup> and high quality evidence based  
recommendations to prescribers, such as the Wise List, become increasingly important. This  
is in line with the Lancet's Commission on Essential Medicines Policies' recommendations  
for achieving Sustainable Development Goal 3.8 for universal access to safe, effective,  
quality and affordable essential medicines and vaccines.<sup>47</sup> The Wise List already contains  
recommendations for some new expensive biological medicines, e.g. TNF inhibitors for use  
in inflammatory bowel disease and rheumatologic diseases. In our opinion, it is of critical  
importance that trusted recommendations and introduction protocols are developed for the use  
of new expensive medicines. A DTC/Wise List with focus on and with recommendations for  
specialised healthcare is necessary to ensure cost-effective and egalitarian use of medicines in  
the future. In fact, a recent study of ours demonstrated that the most important factor  
influencing use of anticoagulants, warfarin or a New Oral Anticoagulants, in Stockholm  
during the last five years was whether the substance was included as a Wise List  
recommendation.<sup>48</sup> New multifaceted methods for safe and successful evidence-based  
introduction of medicines must be developed. This will be a major challenge for the future but  
could build on components in the Wise List concept that has led to high adherence to  
recommendations sustained for 15 years.

### Acknowledgments

The authors would like to thank Stockholm Healthcare Region for providing time for experts to evaluate the data making completion of this study possible.

### Competing Interest Statement

All authors have completed the ICMJE uniform disclosure form at [http://www.icmje.org/coi\\_disclosure.pdf](http://www.icmje.org/coi_disclosure.pdf) and declare: no support from any organisation for the submitted work and no financial relationships with any organisations that might have an interest in the submitted work in the previous three years. Jaran Eriksen is member of an expert panel of the Stockholm DTC since 2013. Kristina Ateva, Pia Bastholm-Rahmner, Maria Juhasz-Haverinen, Malena Jirlow, Marie-Louise Ovesjö, Björn Wettermark are employed by Stockholm Healthcare Region that finances the Drug and Therapeutics Committee (DTC) issuing the “Wise List” in Stockholm. Eva Andersén-Karlsson served as chair-woman of Stockholm DTC 2010-2016, Lars L Gustafsson as chairman 2000-2009 and Gerd Lärffars is chair woman since 2016 and Rickard Malmström deputy chairman since 2016.

The co-authors and collaborators: Tareq Alsaody, Peter Aspelin, Peter Bárány, Harry Beitner, Johan Bratt, Torkel B Brismar, Marja-Liisa Dahl, Ulrika Dahnell, Paulina Dalemo, Christine Fransson, Stina Fransson Sellgren, Jan Hasselström, Roger Henriksson, Rose Marie Hallin, Paul Hjemdahl, Margareta Holmström, Charlotte Höybye, Thomas Kahan, Inga Klarin, Angelica Lindén Hirschberg, Synnöve Lindemalm, Mikael Lördal, Mussie Msghina, Ricard Nergårdh, Christer Norman, Åke Örtqvist, Peter Persson, Magnus Røjvall, Michael Runold, Carl-Olav Stiller, Marie Almvik (Sundström), Leif Tallstedt, Inga Tjäder, Mia von Euler, Rumiana Zlatewa are either present member of Stockholm DTC or chairing one of the 21 expert panels of Stockholm DTC. None of the authors or collaborators listed here have received any salary or economic support for the research presented in this work.

### Data sharing

We have used routinely available prescribing data for a selected group of therapeutic classes. More analyses can be made for these medicines as well as for other medicines prescribed in Sweden.

### Contributorship statement

JE contributed to the conception and design of the study, analysis and interpretation of the data, drafted and revised the manuscript. LLG contributed to the conception and design of the study, analysis and interpretation of the data, and revised the manuscript. KA contributed to data acquisition, analysis and interpretation, and revised the manuscript. PBR contributed to data analysis and interpretation, and revised the manuscript. BW contributed to the conception and design of the study, data acquisition, analysis and interpretation of the data, and revised the manuscript. MJ contributed to data analysis and interpretation, and revised the manuscript. MJH contributed to the data acquisition, analysis and interpretation of the data, and revised

1  
2  
3 the manuscript. RM contributed to the conception and design of the study, analysis and  
4 interpretation of the data, and revised the manuscript. MLHO contributed to the conception  
5 and design of the study, analysis and interpretation of the data, and revised the manuscript.  
6 GL contributed to data analysis and interpretation, and revised the manuscript. EAK  
7 contributed to the conception and design of the study, analysis and interpretation of the data,  
8 and revised the manuscript. All authors critically revised and approved the final manuscript.  
9  
10

### 11 12 13 **Funding statement**

14 This study was in part supported by grants from Karolinska Institutet, Stockholm, Sweden.  
15  
16  
17  
18  
19

### 20 **References**

- 21 1. Bergman U, Wiholm BE. Drug-related problems causing admission to a medical clinic. *Eur J Clin*  
22 *Pharmacol* 1981;20(3):193-200.
- 23 2. Davies EC, Green CF, Taylor S, et al. Adverse drug reactions in hospital in-patients: a prospective  
24 analysis of 3695 patient-episodes. *PLoS One* 2009;4(2):e4439. doi:  
25 10.1371/journal.pone.0004439
- 26 3. Molstad S, Erntell M, Hanberger H, et al. Sustained reduction of antibiotic use and low bacterial  
27 resistance: 10-year follow-up of the Swedish Strama programme. *Lancet Infect Dis*  
28 2008;8(2):125-32. doi: 10.1016/S1473-3099(08)70017-3
- 29 4. WHO. The rational use of drugs - report of the conference of experts Nairobi, 25-29 November  
30 1985. <http://apps.who.int/medicinedocs/documents/s17054e/s17054epdf>. Geneva,  
31 Switzerland: World Health Organization, 1987.
- 32 5. McGinn D, Godman B, Lonsdale J, et al. Initiatives to enhance the quality and efficiency of statin  
33 and PPI prescribing in the UK: impact and implications. *Expert Rev Pharmacoecon Outcomes*  
34 *Res* 2010;10(1):73-85. doi: 10.1586/erp.09.73
- 35 6. Norman C, Zarrinkoub R, Hasselstrom J, et al. Potential savings without compromising the quality  
36 of care. *Int J Clin Pract* 2009;63(9):1320-6. doi: 10.1111/j.1742-1241.2009.02129.x
- 37 7. Fijn R, Brouwers JR, Knaap RJ, et al. Drug and Therapeutics (D & T) committees in Dutch hospitals:  
38 a nation-wide survey of structure, activities, and drug selection procedures. *Br J Clin*  
39 *Pharmacol* 1999;48(2):239-46.
- 40 8. Sjöqvist F, Bergman U, Dahl M, et al. Drug and therapeutics committees: a Swedish experience.  
41 *WHO Drug Information* 2002;16(3)
- 42 9. Birkett D, Brose K, Cascorbi I, et al. Clinical pharmacology in research, teaching and health care:  
43 Considerations by IUPHAR, the International Union of Basic and Clinical Pharmacology. *Basic*  
44 *Clin Pharmacol Toxicol* 2010;107(1):531-59. doi: 10.1111/j.1742-7843.2010.00602.x
- 45 10. WHO. The Selection of Essential Drugs: Report of a WHO Expert Committee. Technical Report  
46 Series no 615. Geneva, Switzerland: World Health Organization, 1977.
- 47 11. Schiff GD, Galanter WL, Duhig J, et al. A prescription for improving drug formulary decision  
48 making. *PLoS Med* 2012;9(5):1-7. doi: 10.1371/journal.pmed.1001220
- 49 12. Grol R, Grimshaw J. From best evidence to best practice: effective implementation of change in  
50 patients' care. *Lancet* 2003;362(9391):1225-30.
- 51 13. Grol R. Successes and failures in the implementation of evidence-based guidelines for clinical  
52 practice. *Med Care* 2001;39(8 Suppl 2):II46-54.  
53  
54  
55  
56  
57  
58  
59  
60



14. Godman B, Wettermark B, Hoffmann M, et al. Multifaceted national and regional drug reforms and initiatives in ambulatory care in Sweden: global relevance. *Expert Rev Pharmacoecon Outcomes Res* 2009;9(1):65-83. doi: 10.1586/14737167.9.1.65
15. Gustafsson LL, Wettermark B, Godman B, et al. The 'wise list'- a comprehensive concept to select, communicate and achieve adherence to recommendations of essential drugs in ambulatory care in Stockholm. *Basic Clin Pharmacol Toxicol* 2011;108(4):224-33. doi: 10.1111/j.1742-7843.2011.00682.x
16. Grimshaw JM, Thomas RE, MacLennan G, et al. Effectiveness and efficiency of guideline dissemination and implementation strategies. *Health Technol Assess* 2004;8(6):iii-iv, 1-72.
17. Grol R, Dalhuijsen J, Thomas S, et al. Attributes of clinical guidelines that influence use of guidelines in general practice: observational study. *BMJ* 1998;317(7162):858-61.
18. Bjorkhem-Bergman L, Andersen-Karlsson E, Laing R, et al. Interface management of pharmacotherapy. Joint hospital and primary care drug recommendations. *Eur J Clin Pharmacol* 2013;69 Suppl 1:73-8. doi: 10.1007/s00228-013-1497-5
19. Wettermark B, Haglund K, Gustafsson LL, et al. A study of adherence to drug recommendations by providing feedback of outpatient prescribing patterns to hospital specialists. *Pharmacoepidemiol Drug Saf* 2005;14(8):579-88. doi: 10.1002/pds.1098
20. The Stockholm Drug and Therapeutics Committee. The Wise List 2015 in English. <http://www.janusinfo.se/In-English/The-Wise-List-2015-in-English/>. Stockholm, Sweden: Stockholm Healthcare Region, 2015.
21. Kumar Kakkar A, Dahiya N. The evolving drug development landscape: from blockbusters to niche busters in the orphan drug space. *Drug Dev Res* 2014;75(4):231-4. doi: 10.1002/ddr.21176
22. Yeh JS, Franklin JM, Avorn J, et al. Association of Industry Payments to Physicians With the Prescribing of Brand-name Statins in Massachusetts. *JAMA Intern Med* 2016;176(6):763-8. doi: 10.1001/jamainternmed.2016.1709
23. Lieb K, Scheurich A. Contact between doctors and the pharmaceutical industry, their perceptions, and the effects on prescribing habits. *PLoS One* 2014;9(10):e110130. doi: 10.1371/journal.pone.0110130
24. Abbasi K, Smith R. No more free lunches. *BMJ* 2003;326(7400):1155-6. doi: 10.1136/bmj.326.7400.1155
25. Stockholm County Council DTC. Jävspolicy för läkemedelskommittéorganisationen i Stockholms läns landsting (SLL) 2011 [Available from: [http://www.janusinfo.se/Global/SLK/javspolicy\\_slk\\_2011\\_2.pdf2016](http://www.janusinfo.se/Global/SLK/javspolicy_slk_2011_2.pdf2016).
26. WHO. WHO Model List of Essential Medicines - 19th List. In: <http://www.who.int/medicines/publications/essentialmedicines/en/>, ed. Geneva, Switzerland: World Health Organization, 2015.
27. Anell A. The public-private pendulum--patient choice and equity in Sweden. *N Engl J Med* 2015;372(1):1-4. doi: 10.1056/NEJMp1411430
28. WHO. WHO Collaborating Centre for Drug Statistics Methodology, Guidelines for ATC classification and DDD assignment, 2015. Oslo: World Health Organization, 2014.
29. Wettermark B, Hammar N, Fored CM, et al. The new Swedish Prescribed Drug Register--opportunities for pharmacoepidemiological research and experience from the first six months. *Pharmacoepidemiol Drug Saf* 2007;16(7):726-35. doi: 10.1002/pds.1294
30. Vlahovic-Palcevski V, Gantumur M, Radosevic N, et al. Coping with changes in the Defined Daily Dose in a longitudinal drug consumption database. *Pharm World Sci* 2010;32(2):125-9. doi: 10.1007/s11096-010-9366-0
31. Andersson K, Bergstrom G, Petzold MG, et al. Impact of a generic substitution reform on patients' and society's expenditure for pharmaceuticals. *Health Policy* 2007;81(2-3):376-84. doi: 10.1016/j.healthpol.2006.07.005
32. Godman B, Shrank W, Andersen M, et al. Comparing policies to enhance prescribing efficiency in Europe through increasing generic utilization: changes seen and global implications. *Expert Rev Pharmacoecon Outcomes Res* 2010;10(6):707-22. doi: 10.1586/erp.10.72

- 1  
2  
3 33. Godman B, Malmstrom RE, Diogene E, et al. Are new models needed to optimize the utilization of  
4 new medicines to sustain healthcare systems? *Expert Rev Clin Pharmacol* 2015;8(1):77-94.  
5 doi: 10.1586/17512433.2015.990380  
6  
7 34. Bergman U, Popa C, Tomson Y, et al. Drug utilization 90%--a simple method for assessing the  
8 quality of drug prescribing. *Eur J Clin Pharmacol* 1998;54(2):113-8.  
9  
10 35. Wettermark B, Pehrsson A, Juhasz-Haverinen M, et al. Financial incentives linked to self-  
11 assessment of prescribing patterns: a new approach for quality improvement of drug  
12 prescribing in primary care. *Qual Prim Care* 2009;17(3):179-89.  
13  
14 36. Hjemdahl P, Allhammar A, Heaton C, et al. [SBU should investigate what is an evidence-based and  
15 cost-effective use of statins]. *Lakartidningen* 2009;106(32-33):1992-4.  
16  
17 37. Gellad WF, Choi P, Mizah M, et al. Assessing the chiral switch: approval and use of single-  
18 enantiomer drugs, 2001 to 2011. *Am J Manag Care* 2014;20(3):e90-7.  
19  
20 38. Fosbol EL, Folke F, Jacobsen S, et al. Cause-specific cardiovascular risk associated with  
21 nonsteroidal antiinflammatory drugs among healthy individuals. *Circ Cardiovasc Qual*  
22 *Outcomes* 2010;3(4):395-405. doi: 10.1161/CIRCOUTCOMES.109.861104  
23  
24 39. Swedish Medical Products Agency. National Substance Register for Medicinal Products (NSL) 2016  
25 [Available from: [http://nsl.mpa.se/index\\_english.htm2016](http://nsl.mpa.se/index_english.htm2016).  
26  
27 40. Stammen LA, Stalmeijer RE, Paternotte E, et al. Training Physicians to Provide High-Value, Cost-  
28 Conscious Care: A Systematic Review. *JAMA* 2015;314(22):2384-400. doi:  
29 10.1001/jama.2015.16353  
30  
31 41. Dreischulte T, Donnan P, Grant A, et al. Safer Prescribing--A Trial of Education, Informatics, and  
32 Financial Incentives. *N Engl J Med* 2016;374(11):1053-64. doi: 10.1056/NEJMsa1508955  
33  
34 42. Oxman AD, Thomson MA, Davis DA, et al. No magic bullets: a systematic review of 102 trials of  
35 interventions to improve professional practice. *CMAJ* 1995;153(10):1423-31.  
36  
37 43. Wolfe S. Rosuvastatin: winner in the statin wars, patients' health notwithstanding. *BMJ*  
38 2015;350:h1388. doi: 10.1136/bmj.h1388  
39  
40 44. Lapointe-Shaw L, Fischer HD, Newman A, et al. Potential savings of harmonising hospital and  
41 community formularies for chronic disease medications initiated in hospital. *PLoS One*  
42 2012;7(6):e39737. doi: 10.1371/journal.pone.0039737  
43  
44 45. Donohue JM, Morden NE, Gellad WF, et al. Sources of regional variation in Medicare Part D drug  
45 spending. *N Engl J Med* 2012;366(6):530-8. doi: 10.1056/NEJMsa1104816  
46  
47 46. Wettermark B, Persson ME, Wilking N, et al. Forecasting drug utilization and expenditure in a  
48 metropolitan health region. *BMC Health Serv Res* 2010;10:128. doi: 10.1186/1472-6963-10-  
49 128  
50  
51 47. Wirtz VJ, Hogerzeil HV, Gray AL, et al. Essential medicines for universal health coverage. *Lancet*  
52 2016 doi: 10.1016/S0140-6736(16)31599-9  
53  
54 48. Komen J, Forslund T, Hjemdahl P, et al. Effects of policy interventions on the introduction of  
55 novel oral anticoagulants in Stockholm: an interrupted time series analysis. *Br J Clin*  
56 *Pharmacol* 2016 doi: 10.1111/bcp.13150  
57  
58  
59  
60

**Table 1.** Some examples of the 55 individual Wise pieces of advice included in the Wise List. Categories: (i) choice of medicine – i.e. preferred choice of substance within a group of medicines used for a specific diagnosis, (ii) overtreatment – i.e. avoid using medicines unnecessarily, (iii) under treatment – i.e. reminders to look for and treat conditions that are often inadequately diagnosed and/or treated, or (iv) any other type of general advice related to drug therapy.

| Example of advice                                                                                                                                                          | Category of advice |
|----------------------------------------------------------------------------------------------------------------------------------------------------------------------------|--------------------|
| Use naproxen as first choice when prescribing cox-inhibitors                                                                                                               | Choice of medicine |
| Choose simvastatin for prevention of cardiovascular disease in high-risk patients with normal to medium increased levels of cholesterol.                                   | Choice of medicine |
| Do not use quinolones for treatment of uncomplicated Urinary Tract Infection (UTI) in women                                                                                | Choice of medicine |
| Always give the patient an updated medication list.                                                                                                                        | General advice     |
| Estimate and consider renal function in the selection and dosing of medicines.                                                                                             | General advice     |
| Verify the diagnosis before treating according to the “heart failure treatment ladder” and seek to establish good heart rate control (below 70 beats/min in sinus rhythm). | General advice     |
| Do not treat uncomplicated acute bronchitis with antibiotics.                                                                                                              | Over treatment     |
| Do not treat asymptomatic bacteriuria in the elderly and only culture from urine if the patient is experiencing urinary tract symptoms.                                    | Over treatment     |
| Treatment with proton pump inhibitors is not advisable in the case of stomach pain of unknown cause.                                                                       | Over treatment     |
| Improve antihypertensive treatment: determine a target blood pressure together with the patient, combine medicines more often and follow up.                               | Under treatment    |
| Treat depression to complete remission.                                                                                                                                    | Under treatment    |
| Increase the use of medicines to prevent relapse in alcohol dependence and follow up treatment outcome.                                                                    | Under treatment    |



1  
2  
3 **Figure 1.** Number of substances included in the Stockholm Healthcare Region's Wise List  
4 over time. *Core medicines* = Essential medicines for common illnesses, used both in primary  
5 and hospital care. *Complementary medicines* = Additional essential medicines to be used  
6 primarily for specialised care.<sup>26</sup>  
7  
8

9  
10  
11 **Figure 2.** Adherence to recommendations (DU90%) in the Wise List for different prescriber  
12 categories in Stockholm Healthcare Region between 2003 and 2015. Data on complementary  
13 medicines available only from 2007. "Others" includes psychiatry, geriatrics, rehabilitation,  
14 school health, occupational health and private practitioners in various specialties.  
15  
16

17  
18  
19 **Figure 3.** Prescribing patterns for statins in Stockholm Healthcare Region between 2002 and  
20 2015 showing all statin prescriptions dispensed to the inhabitants in the region each year. The  
21 letter "R" signifies that the drug was a core recommendation in the Wise List that year.  
22 DDD/TID = Defined Daily Dose/1000 inhabitants per day.  
23  
24

25  
26  
27 **Figure 4.** Prescribing pattern for proton pump inhibitors (PPI) in Stockholm Healthcare  
28 Region between 2002 and 2015 showing all PPI prescriptions dispensed to the inhabitants in  
29 the region each year. The letter "R" signifies that the drug was a core recommendation in the  
30 Wise List that year. DDD/TID = Defined Daily Dose/1000 inhabitants per day.  
31  
32

33  
34  
35 **Figure 5.** Prescribing pattern for SSRIs and SNRIs in Stockholm Healthcare Region between  
36 2002 and 2015 showing all SSRI and SNRI prescriptions dispensed to the inhabitants in the  
37 region each year. The letter "R" signifies that the drug was a core recommendation in the  
38 Wise List that year. ("Others" includes duloxetine, fluoxetine, paroxetine). DDD/TID =  
39 Defined Daily Dose/1000 inhabitants per day.  
40  
41

42  
43  
44 **Figure 6.** Prescribing pattern for COX-inhibitors in Stockholm Healthcare Region between  
45 2002 and 2015 showing all COX-inhibitor prescriptions dispensed to the inhabitants in the  
46 region each year. The letter "R" signifies that the drug was a core recommendation in the  
47 Wise List that year. ("Others" includes aceclofenac, dexibuprofen, phenylbutazone,  
48 indomethacin, ketorolac, lornoxicam, meloxicam, nabumetone, piroxicam, sulindac,  
49 tenoxicam). DDD/TID = Defined Daily Dose/1000 inhabitants per day.  
50  
51

## 52 53 54 **Box 2: The Stockholm model for wise use of medicines**

55 The core part of the model is The Wise List (central part of figure). The outer circle represents  
56 the Key Strategies and the Organisational Unit, which are a pre-requisite for the collaborative  
57  
58  
59

1  
2  
3 work for a rational use of medicines. Since 1996 a new Swedish law stipulated that each  
4 healthcare region should have at least one Drug and Therapeutics Committee (DTC). This has  
5 provided mandate and organisational stability to issued recommendations by DTCs.<sup>8</sup> The  
6 jigsaw puzzle shows key elements necessary for producing the Wise List and implementing  
7 its guidelines in medical practice in the Stockholm Healthcare region. Operative resources  
8 include an annual budget for staff, continuous medical education of our 200 experts,  
9 infrastructure, printing, distribution and marketing of the Wise List.  
10  
11  
12  
13  
14  
15  
16  
17  
18  
19  
20  
21  
22  
23  
24  
25  
26  
27  
28  
29  
30  
31  
32  
33  
34  
35  
36  
37  
38  
39  
40  
41  
42  
43  
44  
45  
46  
47  
48  
49  
50  
51  
52  
53  
54  
55  
56  
57  
58  
59  
60

For peer review only

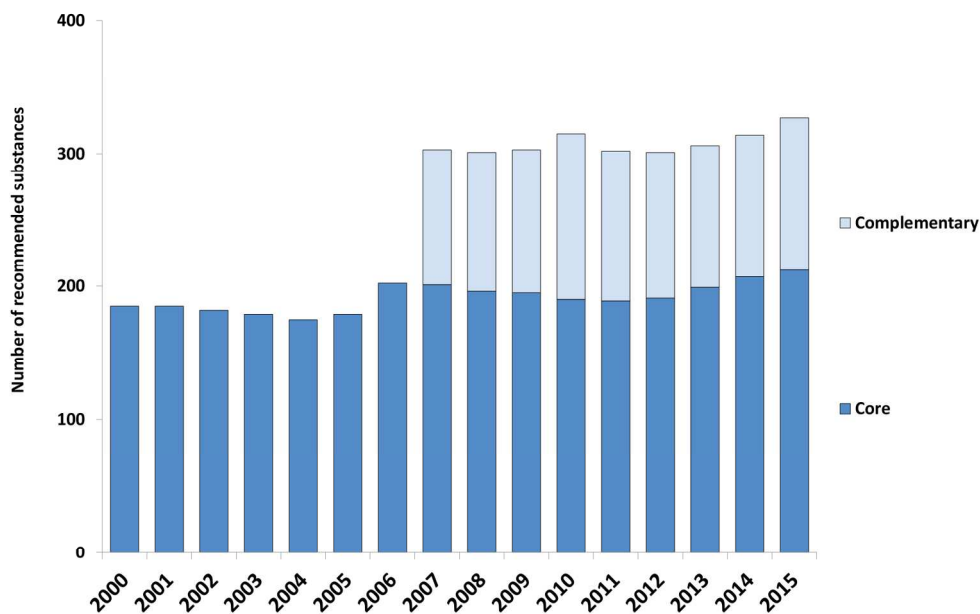

Figure 1. Number of substances included in the Stockholm Healthcare Region's Wise List over time. Core medicines = Essential medicines for common illnesses, used both in primary and hospital care. Complementary medicines = Additional essential medicines to be used primarily for specialised care.<sup>26</sup>

164x108mm (300 x 300 DPI)



Figure 2. Adherence to recommendations (DU90%) in the Wise List for different prescriber categories in Stockholm Healthcare Region between 2003 and 2015. Data on complementary medicines available only from 2007. "Others" includes psychiatry, geriatrics, rehabilitation, school health, occupational health and private practitioners in various specialties.

166x119mm (300 x 300 DPI)

For peer review only

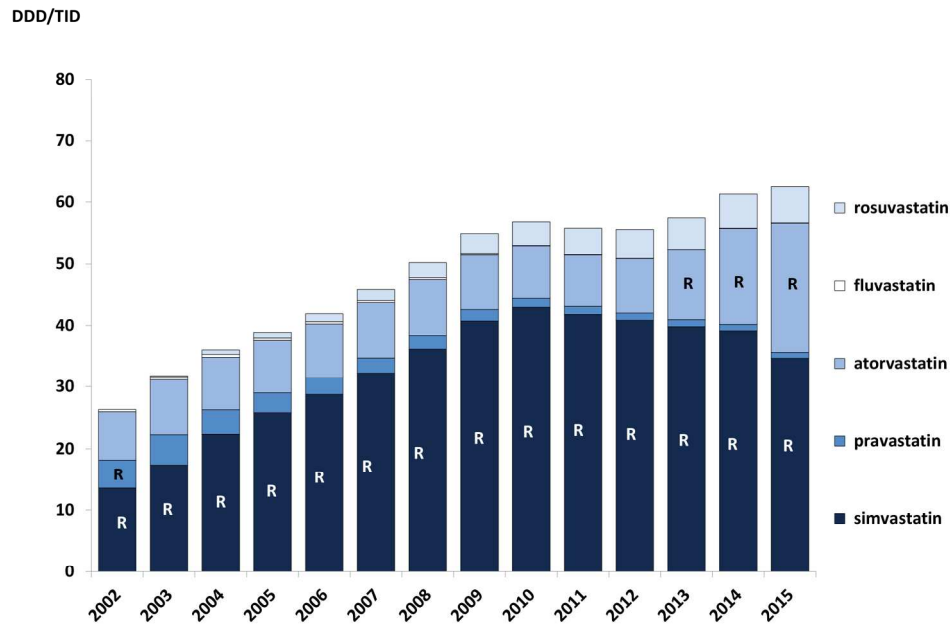

Figure 3. Prescribing patterns for statins in Stockholm Healthcare Region between 2002 and 2015 showing all statin prescriptions dispensed to the inhabitants in the region each year. The letter "R" signifies that the drug was a core recommendation in the Wise List that year. DDD/TID = Defined Daily Dose/1000 inhabitants per day.

172x112mm (300 x 300 DPI)

View only

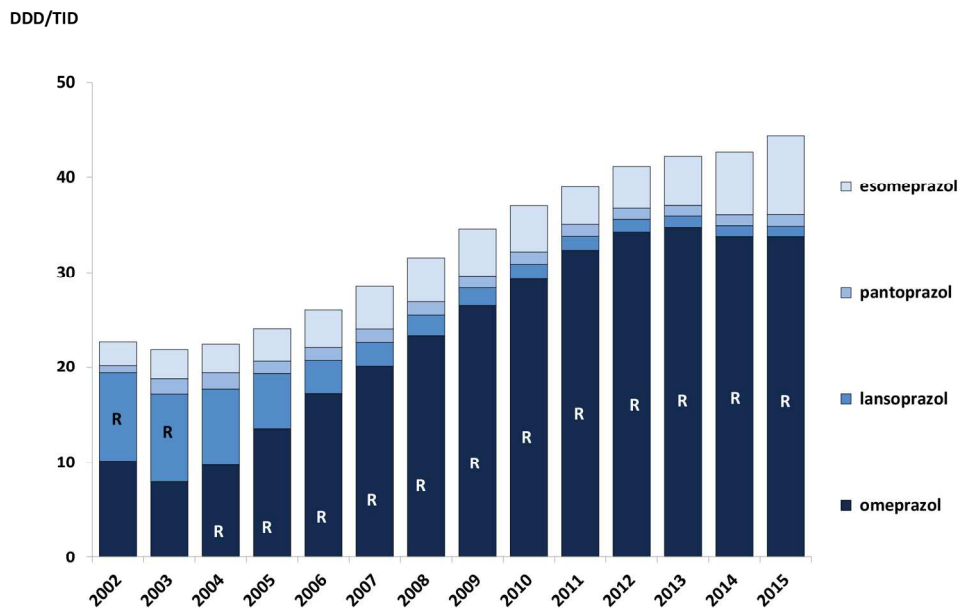

Figure 4. Prescribing pattern for proton pump inhibitors (PPI) in Stockholm Healthcare Region between 2002 and 2015 showing all PPI prescriptions dispensed to the inhabitants in the region each year. The letter "R" signifies that the drug was a core recommendation in the Wise List that year. DDD/TID = Defined Daily Dose/1000 inhabitants per day.

164x106mm (300 x 300 DPI)

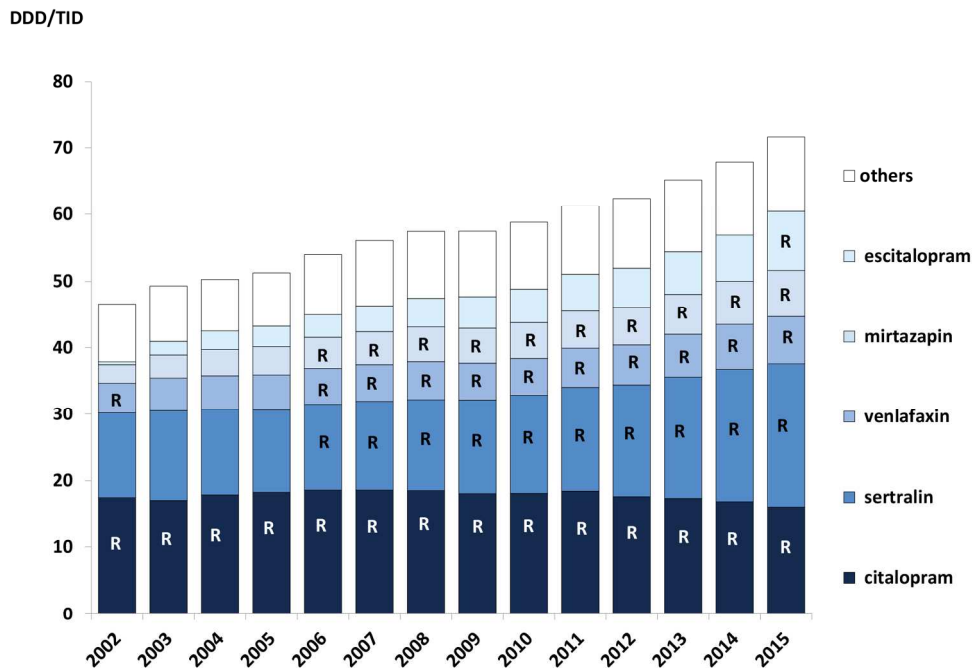

Figure 5. Prescribing pattern for SSRIs and SNRIs in Stockholm Healthcare Region between 2002 and 2015 showing all SSRI and SNRI prescriptions dispensed to the inhabitants in the region each year. The letter "R" signifies that the drug was a core recommendation in the Wise List that year. ("Others" includes duloxetine, fluoxetine, paroxetine). DDD/TID = Defined Daily Dose/1000 inhabitants per day.

167x118mm (300 x 300 DPI)



Figure 6. Prescribing pattern for COX-inhibitors in Stockholm Healthcare Region between 2002 and 2015 showing all COX-inhibitor prescriptions dispensed to the inhabitants in the region each year. The letter "R" signifies that the drug was a core recommendation in the Wise List that year. ("Others" includes aceclofenac, dexibuprofen, phenylbutazone, indomethacin, ketorolac, lornoxicam, meloxicam, nabumetone, piroxicam, sulindac, tenoxicam). DDD/TID = Defined Daily Dose/1000 inhabitants per day.

166x121mm (300 x 300 DPI)



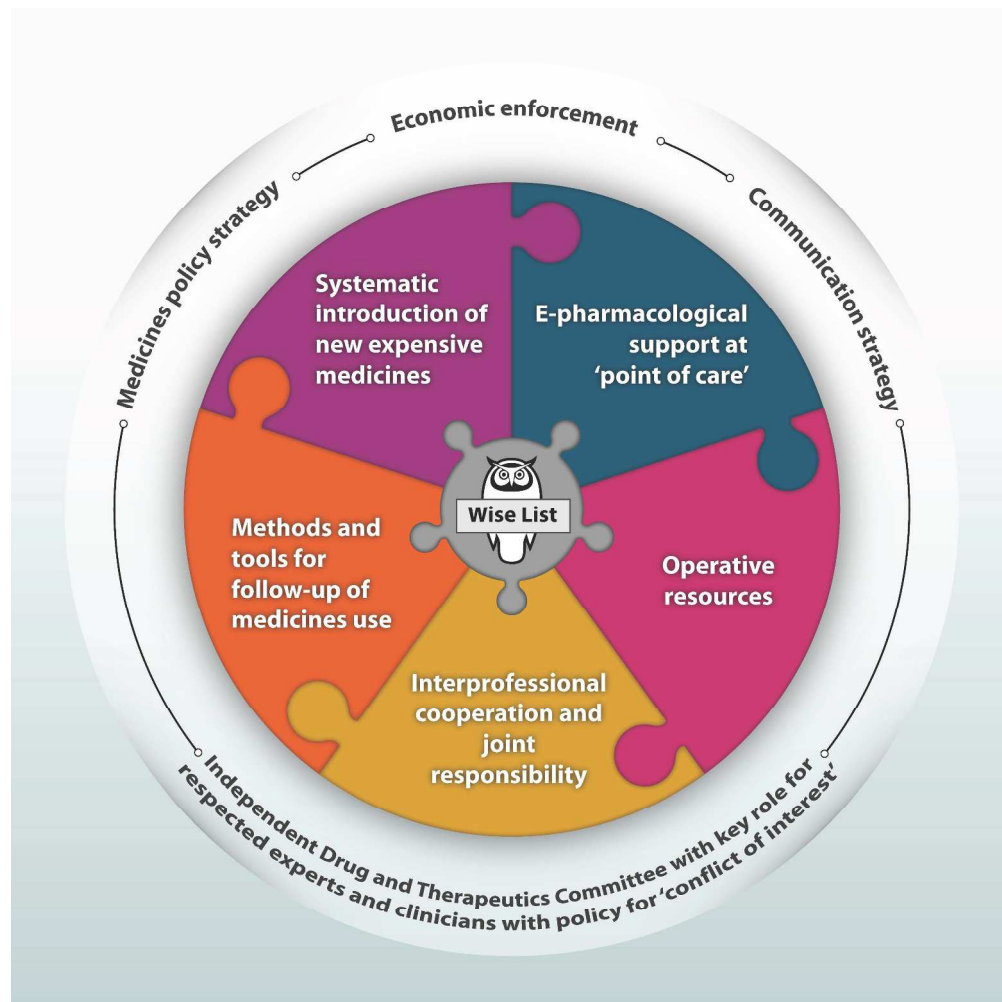

Box 2: The Stockholm model for wise use of medicines

The core part of the model is The Wise List (central part of figure). The outer circle represents the Key Strategies and the Organisational Unit, which are a pre-requisite for the collaborative work for a rational use of medicines. Since 1996 a new Swedish law stipulated that each healthcare region should have at least one Drug and Therapeutics Committee (DTC). This has provided mandate and organisational stability to issued recommendations by DTCs.<sup>8</sup> The jigsaw puzzle shows key elements necessary for producing the Wise List and implementing its guidelines in medical practice in the Stockholm Healthcare region. Operative resources include an annual budget for staff, continuous medical education of our 200 experts, infrastructure, printing, distribution and marketing of the Wise List.

552x552mm (150 x 150 DPI)

## SQUIRE 2.0 Checklist

| Title and Abstract            |                                                                                                                                                                                                                                                                                                               | Comment                                                                                                                                                                                       |
|-------------------------------|---------------------------------------------------------------------------------------------------------------------------------------------------------------------------------------------------------------------------------------------------------------------------------------------------------------|-----------------------------------------------------------------------------------------------------------------------------------------------------------------------------------------------|
| 1. Title                      | Indicate that the manuscript concerns an <b>initiative</b> to improve healthcare (broadly defined to include the quality, safety, effectiveness, patient-centeredness, timeliness, cost, efficiency, and equity of healthcare)                                                                                | Yes, included: <i>High adherence to the "Wise List" treatment recommendations in Stockholm: a 15-year retrospective review of a multifaceted approach promoting rational use of medicines</i> |
| 2. Abstract                   | a. Provide adequate information to aid in searching and indexing<br>b. Summarize all key information from various sections of the text using the abstract format of the intended publication or a structured summary such as: background, local <b>problem</b> , methods, interventions, results, conclusions | a. included<br>b. Yes, all points included except background and local problem (as the abstract has been formatted according to BMJOpen guidelines).                                          |
| Introduction                  | Why did you start?                                                                                                                                                                                                                                                                                            |                                                                                                                                                                                               |
| 3. <b>Problem Description</b> | Nature and significance of the local <b>problem</b>                                                                                                                                                                                                                                                           | In the background, second paragraph, the problem and its significance in the Stockholm Healthcare Region is described.                                                                        |
| 4. Available knowledge        | Summary of what is currently known about the <b>problem</b> , including relevant previous studies                                                                                                                                                                                                             | Described in first and second paragraphs in the background section.                                                                                                                           |
| 5. Rationale                  | Informal or formal frameworks, models, concepts, and/or <b>theories</b> used to explain the <b>problem</b> , any reasons or <b>assumptions</b> that                                                                                                                                                           | Described in the second paragraph of the background                                                                                                                                           |

1  
2  
3  
4  
5  
6  
7  
8  
9  
10  
11  
12  
13  
14  
15  
16  
17  
18  
19  
20  
21  
22  
23  
24  
25  
26  
27  
28  
29  
30  
31  
32  
33  
34  
35  
36  
37  
38  
39  
40  
41  
42  
43  
44  
45  
46  
47  
48  
49

|                                 |                                                                                                                                                                                                        |                                                                                                                                       |
|---------------------------------|--------------------------------------------------------------------------------------------------------------------------------------------------------------------------------------------------------|---------------------------------------------------------------------------------------------------------------------------------------|
|                                 | were used to develop the <b>intervention(s)</b> , and reasons why the <b>intervention(s)</b> was expected to work                                                                                      |                                                                                                                                       |
| 6. Specific aims                | Purpose of the project and of this report                                                                                                                                                              | Stated in the last sentence of the background.                                                                                        |
| Methods                         | What did you do?                                                                                                                                                                                       |                                                                                                                                       |
| 7. Context                      | Contextual elements considered important at the outset of introducing the <b>intervention(s)</b>                                                                                                       | Explained under “study area” (first section of “material and methods”)                                                                |
| 8. Intervention(s)              | a. Description of the <b>intervention(s)</b> in sufficient detail that others could reproduce it<br>b. Specifics of the team involved in the work                                                      | Explained in “box 1” and “box 2”                                                                                                      |
| 9. Study of the Intervention(s) | a. Approach chosen for assessing the impact of the <b>intervention(s)</b><br>b. Approach used to establish whether the observed outcomes were due to the <b>intervention(s)</b>                        | a. Explained under “data analysis”: three sections explaining each of the three approaches.<br>b. Described in “statistical analysis” |
| 10. Measures                    | a. Measures chosen for studying <b>processes</b> and outcomes of the <b>intervention(s)</b> , including rationale for choosing them, their operational definitions, and their validity and reliability | a. Described under “data sources”                                                                                                     |

|                            |                                                                                                                                                                                                                                                                                                                          |                                                                                                                                                                                                                                  |
|----------------------------|--------------------------------------------------------------------------------------------------------------------------------------------------------------------------------------------------------------------------------------------------------------------------------------------------------------------------|----------------------------------------------------------------------------------------------------------------------------------------------------------------------------------------------------------------------------------|
|                            | <p>b. Description of the approach to the ongoing assessment of contextual elements that contributed to the success, failure, efficiency, and cost</p> <p>c. Methods employed for assessing completeness and accuracy of data</p>                                                                                         | <p>b. Described in the three subsections of “data analysis”</p> <p>c. N/A</p>                                                                                                                                                    |
| 11. Analysis               | <p>a. Qualitative and quantitative methods used to draw <b>inferences</b> from the data</p> <p>b. Methods for understanding variation within the data, including the effects of time as a variable</p>                                                                                                                   | <p>a. Described under “statistical analysis”</p>                                                                                                                                                                                 |
| 12. Ethical Considerations | <p><b>Ethical aspects</b> of implementing and studying the <b>intervention(s)</b> and how they were addressed, including, but not limited to, formal ethics review and potential conflict(s) of interest</p>                                                                                                             | <p>“Described in the section “ethical considerations”</p>                                                                                                                                                                        |
| Results                    | <p>What did you find?</p>                                                                                                                                                                                                                                                                                                |                                                                                                                                                                                                                                  |
| 13. Results                | <p>a. Initial steps of the <b>intervention(s)</b> and their evolution over time (e.g., time-line diagram, flow chart, or table), including modifications made to the intervention during the project</p> <p>b. Details of the <b>process</b> measures and outcome</p> <p>c. Contextual elements that interacted with</p> | <p>a. All results presented as change over time, e.g. all figures</p> <p>b. N/A</p> <p>c. Described where relevant, e.g. under subheading “adherence to specific pharmacotherapeutic areas...” for statins: page 10, line 7.</p> |

1  
2  
3  
4  
5  
6  
7  
8  
9  
10  
11  
12  
13  
14  
15  
16  
17  
18  
19  
20  
21  
22  
23  
24  
25  
26  
27  
28  
29  
30  
31  
32  
33  
34  
35  
36  
37  
38  
39  
40  
41  
42  
43  
44  
45  
46  
47  
48  
49

|                    |                                                                                                                                                                                                                                                                                                                                                                                                        |                                                                                                                                                 |
|--------------------|--------------------------------------------------------------------------------------------------------------------------------------------------------------------------------------------------------------------------------------------------------------------------------------------------------------------------------------------------------------------------------------------------------|-------------------------------------------------------------------------------------------------------------------------------------------------|
|                    | <p>the <a href="#">intervention(s)</a></p> <p>d. Observed associations between outcomes, interventions, and relevant contextual elements</p> <p>e. Unintended consequences such as unexpected benefits, problems, failures, or costs associated with the <a href="#">intervention(s)</a>.</p> <p>f. Details about missing data</p>                                                                     | <p>d. Described for each of the therapeutic areas on page 10</p> <p>e. Described for each of the therapeutic areas on page 10</p> <p>f. N/A</p> |
| Discussion         | What does it mean?                                                                                                                                                                                                                                                                                                                                                                                     |                                                                                                                                                 |
| 14. Summary        | <p>a. Key findings, including relevance to the <a href="#">rationale</a> and specific aims</p> <p>b. Particular strengths of the project</p>                                                                                                                                                                                                                                                           | <p>a. First paragraph of discussion</p> <p>b. Described on page 12, second paragraph</p>                                                        |
| 15. Interpretation | <p>a. Nature of the association between the intervention(s) and the outcomes</p> <p>b. Comparison of results with findings from other publications</p> <p>c. Impact of the project on people and systems</p> <p>d. Reasons for any differences between observed and anticipated outcomes, including the influence of context</p> <p>e. Costs and strategic trade-offs, including opportunity costs</p> | Described in second and third paragraphs of the discussion.                                                                                     |
|                    |                                                                                                                                                                                                                                                                                                                                                                                                        |                                                                                                                                                 |

|                   |                                                                                                                                                                                                                                                            |                                                   |
|-------------------|------------------------------------------------------------------------------------------------------------------------------------------------------------------------------------------------------------------------------------------------------------|---------------------------------------------------|
| 16. Limitations   | a. Limits to the generalizability of the work<br>b. Factors that might have limited internal validity such as confounding, bias, or imprecision in the design, methods, measurement, or analysis<br>c. Efforts made to minimize and adjust for limitations | Described in second paragraph page 12             |
| 17. Conclusions   | a. Usefulness of the work<br>b. Sustainability<br>c. Potential for spread to other contexts<br>d. Implications for practice and for further study in the field<br>e. Suggested next steps                                                                  | Described in the last paragraph of the discussion |
| Other information |                                                                                                                                                                                                                                                            |                                                   |
| 18. Funding       | Sources of funding that supported this work. Role, if any, of the funding organization in the design, implementation, interpretation, and reporting                                                                                                        | Described in competing interest statement         |
